# Supplementary material for: Synthesis of alpha-pyrones and chromen-2-ones by transition-metal catalyzed annulations of sulfoxonium and iodonium ylides withcis-stilbene acids
Source: Royal Society of Chemistry journal article supplement (doi:10.1039/d2nj03454a), 2022-01-01

## Synthesis of alpha-pyrones and chromen-2-ones by transition-metal catalyzed annulations of sulfoxonium and iodonium ylides with *cis*-stilbene acids

Stephy Elza John, Darshana Bora, Sowmya Dastari, Durgesh Gurukkala Valapil and Nagula Shankaraiah\*

*Department of Medicinal Chemistry, National Institute of Pharmaceutical Education and Research (NIPER), Hyderabad - 500 037, India*

\*Corresponding author; E-mail.: [shankar@niperhyd.ac.in](mailto:shankar@niperhyd.ac.in); [shankarnbs@gmail.com](mailto:shankarnbs@gmail.com)

### Contents

|                                                                                      |    |
|--------------------------------------------------------------------------------------|----|
| 1. General Information .....                                                         | 2  |
| 2. Preparation of starting precursor .....                                           | 2  |
| 2.1. General procedure for synthesis of <b>1a-o</b> .....                            | 2  |
| 2.2. General procedure for the synthesis of ylides <b>2a-k</b> and <b>4a-e</b> ..... | 2  |
| 3. General procedure for synthesis of $\alpha$ -pyrones and chromene-2-ones .....    | 3  |
| 3.1. General procedure for synthesis of <b>3</b> .....                               | 3  |
| 4. Optimization of Rh(III)-catalyzed C-H activation with iodonium ylide.....         | 5  |
| 5. Characterization data.....                                                        | 5  |
| 6. Mechanistic studies for ruthenium-catalyzed $\alpha$ -pyrone synthesis.....       | 16 |
| 6.1. Competitive reaction between <i>cis</i> -stilbene acids .....                   | 16 |
| 6.2. H/D Exchange Experiment .....                                                   | 17 |
| 7. Mass studies.....                                                                 | 18 |
| 8. Gram-Scale Preparation and Transformations .....                                  | 20 |
| 8.1. Gram-Scale Synthesis of <b>3i</b> .....                                         | 20 |
| 8.2. Synthesis of thione ( <b>6</b> ) .....                                          | 21 |
| 8.3. Gram-Scale Synthesis of <b>5a</b> .....                                         | 21 |
| 9. Application .....                                                                 | 21 |
| 9.1. Photophysical study .....                                                       | 21 |
| 9.2. Molecular docking .....                                                         | 22 |
| 9.3. MTT Assay .....                                                                 | 22 |
| 10. References .....                                                                 | 23 |
| 11. Spectral Data.....                                                               | 25 |

## 1. General Information

All the chemicals, starting materials, reagents and solvents were procured from commercial sources and were used without further purification. Thin layer chromatography was performed on MERCK precoated silica gel 60F-254 (0.5 mm) aluminum plates and visualized under UV light at 254 nm. Column chromatography was performed using silica gel #60-120 and #100-200 mesh. The  $^1\text{H}$  NMR spectra were recorded on NMR Bruker instrument operated at 500 MHz. Chemical shifts are reported in ppm with the solvent resonance as the internal standard ( $\text{CDCl}_3$ :  $\delta$  7.25 ppm).  $^{13}\text{C}$  NMR spectra were recorded on NMR Bruker instrument operated at 125 MHz with complete proton decoupling. Chemical shifts are reported in ppm with the solvent resonance as the internal standard ( $\text{CDCl}_3$ :  $\delta$  77.16 ppm). The following abbreviations were used for  $^1\text{H}$  NMR spectra to indicate the signal multiplicity: s (singlet), d (doublet), t (triplet), q (quartet), m (multiplet), dd (doublet of doublet) and dt (doublet of triplet). HRMS was measured in ESI-MS mass spectrophotometer.

## 2. Preparation of starting precursor

### 2.1. General procedure for synthesis of 1a-o

The *cis*-stilbene acids were synthesized using the previous literature report.<sup>1</sup>

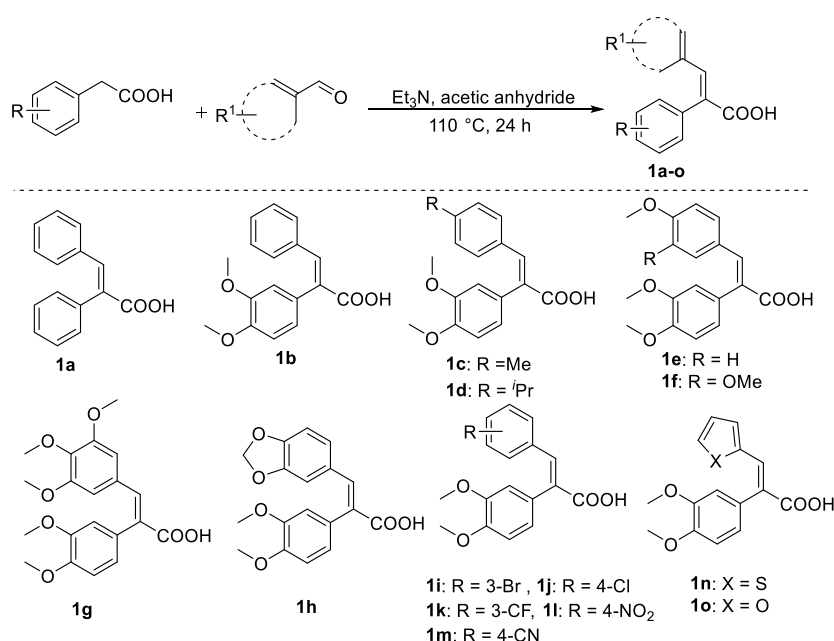

### 2.2. General procedure for the synthesis of ylides 2a-k and 4a-e

The sulfoxonium ylides were prepared using reported literature procedure. Similarly, the hypervalent iodonium ylides were prepared using reported method.<sup>2</sup>

### Sulfoxonium ylides

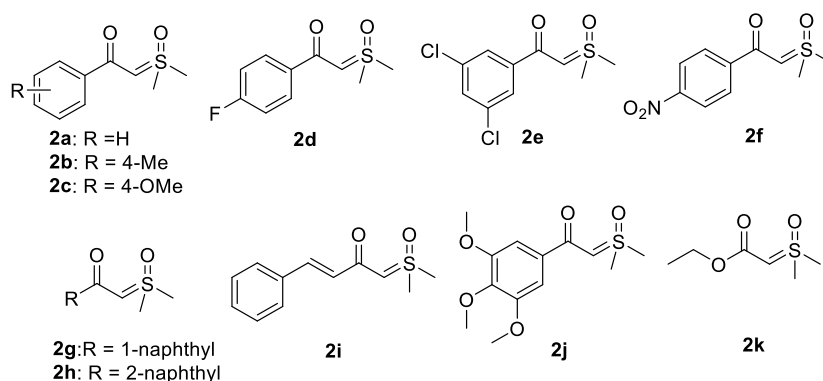

### Iodonium ylides

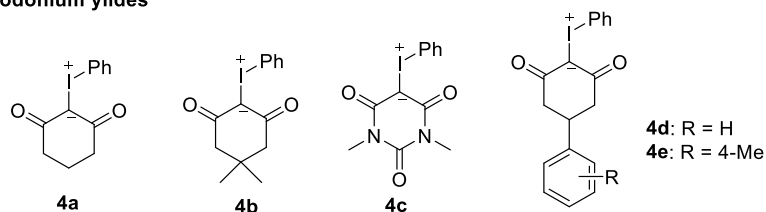

## 3. General procedure for synthesis of $\alpha$ -pyrones and chromene-2-ones

### 3.1. General procedure for synthesis of **3**

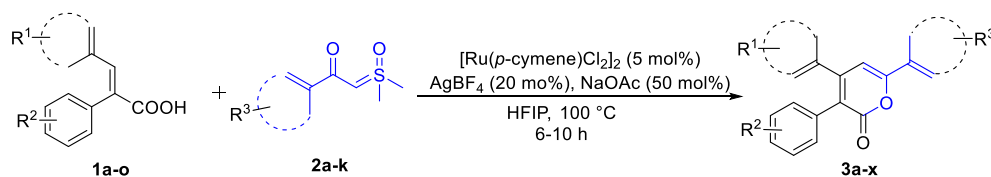

An oven dried pressure reaction tube with a magnetic stir bar was charged with substituted *cis*-stilbene analogues **1a-o** (1.0 equiv.), substituted sulfoxonium ylide **2a-k** (1.2 equiv.), [Ru(*p*-cymene)Cl<sub>2</sub>]<sub>2</sub> (5 mol%), AgBF<sub>4</sub> (20 mol%), NaOAc (50 mol%) in 1 mL of HFIP. The reaction mixture was then heated at 100 °C for 6-10 h until the reaction was complete as indicated by TLC. Upon completion of reaction, the solvent was evaporated under reduced pressure and the crude product was directly purified by a silica gel column chromatography using ethyl acetate/hexane (20-40%) as the eluent to afford the corresponding products **3a-x**. All the synthesized compounds were thoroughly characterized by IR, <sup>1</sup>H and <sup>13</sup>C NMR and HRMS (ESI).

**Table S1.** Additional condition variation for optimization of synthesis of  $\alpha$ -pyrones

| Entry | Deviation from standard condition                                                  | Yield (%) |
|-------|------------------------------------------------------------------------------------|-----------|
| 1.    | <b>Catalyst</b><br>[Ru( <i>p</i> -cymene)Cl <sub>2</sub> ] <sub>2</sub> (2.5 mol%) | 46        |
| 2     | <b>Base</b><br>NaOAc (25 mol%)                                                     | 50        |
|       | NaOAc (1 equiv.)                                                                   | 78        |
| 3     | <b>Additive</b><br>AgBF <sub>4</sub> (10 mol%)                                     | 65        |
|       | AgBF <sub>4</sub> (30 mol%)                                                        | 78        |

### 3.2. General procedure for synthesis of compound 5

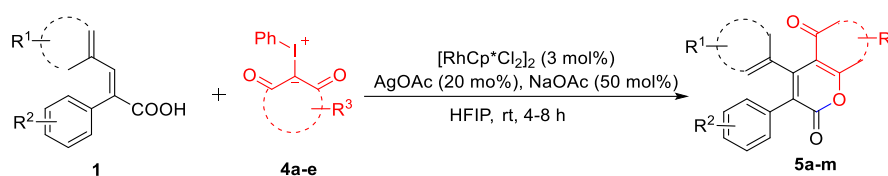

An oven dried reaction tube with a magnetic stir bar was charged with substituted *cis*-stilbene analogues **1** (1.0 equiv.), substituted hypervalent iodonium ylides **4a-e** (1.2 equiv.), [RhCp\*Cl<sub>2</sub>]<sub>2</sub> (3 mol%), AgOAc (20 mol%) and NaOAc (50 mol%) in 1 mL of HFIP. The reaction mixture was then stirred at room temperature until the reaction is complete as indicated by TLC. Upon completion of reaction, the solvent was evaporated under reduced pressure and the crude product was directly purified by column chromatography (silica gel) by using ethyl acetate/ hexane (20-30%) as the eluent to afford the corresponding products **5a-m**. All the synthesized compounds were thoroughly characterized by IR, <sup>1</sup>H and <sup>13</sup>C NMR and HRMS (ESI).

## 4. Optimization of Rh(III)-catalyzed C-H activation with iodonium ylide

**Table S2.** Optimization of Rh(III)-catalyzed carbene insertion through iodonium ylide<sup>a</sup>

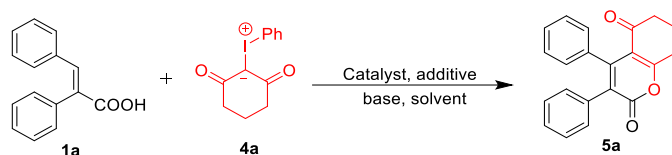

| Entry | Catalyst                                             | Additive          | Base                            | Solvent               | Temp. (°C) | Yield (%) <sup>d</sup> |
|-------|------------------------------------------------------|-------------------|---------------------------------|-----------------------|------------|------------------------|
| 1     | [Ru( <i>p</i> -cymene)Cl <sub>2</sub> ] <sub>2</sub> | AgBF <sub>4</sub> | NaOAc                           | HFIP                  | 80         | 10                     |
| 2     | [Ru( <i>p</i> -cymene)Cl <sub>2</sub> ] <sub>2</sub> | AgBF <sub>4</sub> | NaOAc                           | TFE                   | 120        | 10                     |
| 3     | [Ru( <i>p</i> -cymene)Cl <sub>2</sub> ] <sub>2</sub> | AgBF <sub>4</sub> | Cs <sub>2</sub> CO <sub>3</sub> | HFIP                  | 80         | NR                     |
| 4     | [Ru( <i>p</i> -cymene)Cl <sub>2</sub> ] <sub>2</sub> | AgBF <sub>4</sub> | NaOAc                           | HFIP                  | 100        | NR                     |
| 5     | [Ru( <i>p</i> -cymene)Cl <sub>2</sub> ] <sub>2</sub> | AgBF <sub>4</sub> | Zn(OAc) <sub>2</sub>            | HFIP                  | 100        | NR                     |
| 6     | [Ru( <i>p</i> -cymene)Cl <sub>2</sub> ] <sub>2</sub> | AgBF <sub>4</sub> | Zn(OAc) <sub>2</sub> + NaOAc    | HFIP                  | 100        | NR                     |
| 7     | [Ru( <i>p</i> -cymene)Cl <sub>2</sub> ] <sub>2</sub> | AgBF <sub>4</sub> | Zn(OAc) <sub>2</sub> + NaOAc    | HFIP+H <sub>2</sub> O | 100        | NR                     |
| 8     | [Ru( <i>p</i> -cymene)Cl <sub>2</sub> ] <sub>2</sub> | AgBF <sub>4</sub> | NaOAc                           | HFIP                  | 100        | NR                     |
| 9     | [Ru( <i>p</i> -cymene)Cl <sub>2</sub> ] <sub>2</sub> | AgOAc             | NaOAc                           | HFIP                  | 80         | 20                     |
| 10    | [Ru( <i>p</i> -cymene)Cl <sub>2</sub> ] <sub>2</sub> | AgOAc             | NaOAc                           | DCE                   | 80         | 10                     |
| 11    | [Ru( <i>p</i> -cymene)Cl <sub>2</sub> ] <sub>2</sub> | AgOAc             | NaOAc                           | DCE                   | 120        | 10                     |
| 12    | [Ru( <i>p</i> -cymene)Cl <sub>2</sub> ] <sub>2</sub> | AgOAc             | NaOAc                           | ACN                   | 120        | NR                     |
| 13    | [Ru( <i>p</i> -cymene)Cl <sub>2</sub> ] <sub>2</sub> | AgOAc             | NaOAc                           | THF                   | 80         | NR                     |
| 14    | [Ru( <i>p</i> -cymene)Cl <sub>2</sub> ] <sub>2</sub> | AgOAc             | NaOAc                           | DCM                   | 80         | 10                     |
| 15    | [Ru( <i>p</i> -cymene)Cl <sub>2</sub> ] <sub>2</sub> | AgOAc             | NaOAc                           | CHCl <sub>3</sub>     | 60         | 10                     |
| 16    | [Ru( <i>p</i> -cymene)Cl <sub>2</sub> ] <sub>2</sub> | AgOAc             | NaOAc                           | DMF                   | 100        | NR                     |
| 17    | [Ru( <i>p</i> -cymene)Cl <sub>2</sub> ] <sub>2</sub> | AgOAc             | NaOAc                           | Dioxane               | 100        | NR                     |
| 18    | [Ru( <i>p</i> -cymene)Cl <sub>2</sub> ] <sub>2</sub> | AgOAc             | NaOAc                           | MeOH                  | 80         | NR                     |
| 19    | [Ru( <i>p</i> -cymene)Cl <sub>2</sub> ] <sub>2</sub> | AgOAc             | NaOAc                           | TFE                   | 120        | NR                     |
| 20    | [Ru( <i>p</i> -cymene)Cl <sub>2</sub> ] <sub>2</sub> | AgOAc             | Mn(OAc) <sub>3</sub>            | HFIP                  | 80         | NR                     |
| 21    | [Ru( <i>p</i> -cymene)Cl <sub>2</sub> ] <sub>2</sub> | AgOAc             | Mn(OAc) <sub>3</sub> + NaOAc    | HFIP                  | 80         | NR                     |
| 22    | [Ru( <i>p</i> -cymene)Cl <sub>2</sub> ] <sub>2</sub> | AgOAc             | CsOAc                           | HFIP                  | 80         | NR                     |
| 23    | [Rh(Cp*Cl <sub>2</sub> ) <sub>2</sub> ]              | -                 | NaOAc                           | HFIP                  | 80         | 75                     |
| 24    | [Rh(Cp*Cl <sub>2</sub> ) <sub>2</sub> ]              | -                 | NaOAc                           | HFIP                  | 25         | 72 <sup>c</sup>        |
| 25    | [Rh(Cp*Cl <sub>2</sub> ) <sub>2</sub> ]              | AgOAc             | NaOAc                           | HFIP                  | 25         | 83 <sup>b</sup>        |
| 26    | <b>[Rh(Cp*Cl<sub>2</sub>)<sub>2</sub>]</b>           | <b>AgOAc</b>      | <b>NaOAc</b>                    | <b>HFIP</b>           | <b>25</b>  | <b>85</b>              |
| 27    | [Rh(Cp*Cl <sub>2</sub> ) <sub>2</sub> ]              | AgOAc             | NaOAc                           | DCE                   | 25         | 30                     |
| 28    | [Rh(Cp*Cl <sub>2</sub> ) <sub>2</sub> ]              | AgOAc             | NaOAc                           | TFE                   | 25         | 50                     |

<sup>a</sup>Reaction conditions: **1a** (0.31mmol), **4a** (0.37 mmol), [Ru(*p*-cymene)Cl<sub>2</sub>]<sub>2</sub> (5 mol%), additive (20 mol%), base (50 mol%), solvent (1 mL), 12 h in pressure tube. <sup>b</sup>Catalyst (3 mol%), <sup>c</sup>time = 4 h. <sup>d</sup>Isolated yield, NR = No Reaction.

## 5. Characterization data

**3,5,6-Triphenyl-2H-pyran-2-one (3a):** 80% yield (81.0 mg), yellow solid, mp: 175-178 °C, FT-

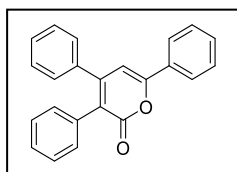

IR (cm<sup>-1</sup>): 2977, 1704, 1694, 1598, 1575; <sup>1</sup>H NMR (500 MHz, CDCl<sub>3</sub>): δ 7.91 (dd, *J* = 6.6, 3.0 Hz, 2H), 7.48 (dd, *J* = 5.0, 2.0 Hz, 3H), 7.27 (d, *J* = 6.6 Hz, 4H), 7.23 (s, 2H), 7.21–7.19 (m, 2H), 7.18–7.15 (m, 2H), 6.85 (s, 1H) ppm; <sup>13</sup>C NMR (125 MHz, CDCl<sub>3</sub>): δ 162.7, 158.3, 152.7, 137.8,

133.8, 131.4, 130.9, 130.7, 128.9, 128.7, 128.7, 128.4, 128.0, 127.7, 125.6, 123.2, 105.0 ppm; HRMS (ESI-QTOF):  $m/z$   $[M+H]^+$  calcd. for  $C_{23}H_{17}O_2$  325.1223 found 325.1223.

**6-(3,4-Dimethoxyphenyl)-3,5-diphenyl-2H-pyran-2-one (3b)**: 85% yield (80.4 mg), yellow

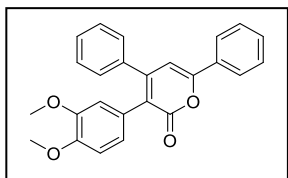

solid, mp: 134-137 °C, FT-IR (cm)<sup>-1</sup>: 3005, 2849, 1715, 1624, 1541; <sup>1</sup>H NMR (500 MHz, CDCl<sub>3</sub>):  $\delta$  7.92–7.89 (m, 2H), 7.47 (dd,  $J$  = 5.1, 2.0 Hz, 3H), 7.28 (dd,  $J$  = 5.0, 1.8 Hz, 3H), 7.22–7.16 (m, 2H), 6.88 (dd,  $J$  = 8.3, 2.0 Hz, 1H), 6.83 (s, 1H), 6.76 (d,  $J$  = 8.3 Hz, 1H), 6.63

(d,  $J$  = 2.0 Hz, 1H), 3.85 (s, 3H), 3.61 (s, 3H) ppm; <sup>13</sup>C NMR (125 MHz, CDCl<sub>3</sub>):  $\delta$  162.8, 157.9, 152.3, 148.5, 148.2, 138.2, 131.4, 130.7, 129.0, 128.6, 128.6, 128.5, 126.0, 125.5, 123.7, 122.8, 114.3, 110.7, 105.0, 55.8, 55.7 ppm; HRMS (ESI-QTOF):  $m/z$   $[M+H]^+$  calcd. for  $C_{25}H_{21}O_4$  385.1434 found 385.1468.

**6-(3,4-Dimethoxyphenyl)-3-phenyl-5-(p-tolyl)-2H-pyran-2-one (3c)**: 79% yield (73.8 mg),

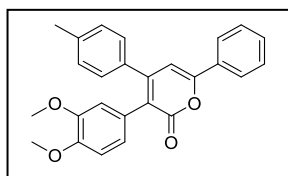

yellow solid, mp: 145-148 °C, FT-IR (cm)<sup>-1</sup>: 2972, 1714, 1625, 1540, 1509; <sup>1</sup>H NMR (500 MHz, CDCl<sub>3</sub>):  $\delta$  7.90 (d,  $J$  = 6.0 Hz, 2H), 7.47 (d,  $J$  = 5.2 Hz, 3H), 7.08 (s, 4H), 6.88 (d,  $J$  = 7.8 Hz, 1H), 6.83 (s, 1H), 6.78 (d,  $J$  = 8.3 Hz, 1H), 6.64 (s, 1H), 3.86 (s, 3H), 3.62 (s, 3H),

2.32 (s, 3H) ppm; <sup>13</sup>C NMR (125 MHz, CDCl<sub>3</sub>):  $\delta$  162.9, 157.8, 152.3, 148.5, 148.2, 138.7, 135.2, 131.5, 130.6, 129.1, 129.0, 128.9, 128.8, 128.5, 126.3, 125.5, 123.7, 122.5, 114.3, 110.7, 105.1, 55.8, 55.7, 21.2 ppm; HRMS (ESI-QTOF):  $m/z$   $[M+H]^+$  calcd. for  $C_{26}H_{23}O_4$  399.1591 found 399.1593.

**6-(3,4-Dimethoxyphenyl)-5-(4-isopropylphenyl)-3-phenyl-2H-pyran-2-one (3d)**: 75% yield

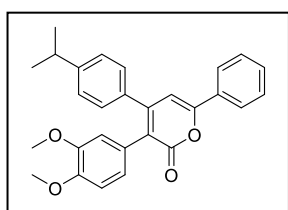

(68.6 mg), yellow solid, mp: 157-159 °C, FT-IR (cm)<sup>-1</sup>: 2955, 1701, 1625, 1535, 1514; <sup>1</sup>H NMR (500 MHz, CDCl<sub>3</sub>):  $\delta$  7.90 (dd,  $J$  = 6.8, 2.9 Hz, 2H), 7.47 (dd,  $J$  = 5.2, 2.1 Hz, 3H), 7.15-7.11 (m, 4H), 6.98-6.96 (m, 1H), 6.84 (s, 1H), 6.80 (d,  $J$  = 8.3 Hz, 1H), 6.56 (d,  $J$  = 2.1

Hz, 1H), 3.86 (s, 3H), 3.55 (s, 3H), 2.91–2.86 (m, 1H), 1.22 (d,  $J$  = 6.9 Hz, 6H) ppm; <sup>13</sup>C NMR (125 MHz, CDCl<sub>3</sub>):  $\delta$  162.9, 157.8, 152.2, 149.7, 148.5, 148.2, 135.6, 131.5, 130.6, 128.9, 128.6, 126.5, 126.2, 125.5, 123.8, 122.4, 114.4, 110.7, 105.2, 55.8, 55.6, 33.9, 23.8 ppm; HRMS (ESI-QTOF):  $m/z$   $[M+H]^+$  calcd. for  $C_{28}H_{27}O_4$  427.1904 found 427.1914.

**5,6-Bis(3,4-dimethoxyphenyl)-3-phenyl-2H-pyran-2-one (3f):** 72% yield (65.0 mg), yellow

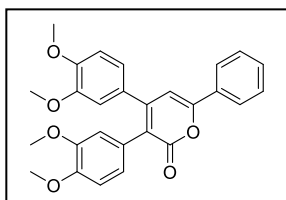

solid, mp: 150-153 °C, FT-IR (cm)<sup>-1</sup>: 2978, 1718, 1649, 1580, 1541; <sup>1</sup>H NMR (500 MHz, CDCl<sub>3</sub>): δ 7.91 (dd, *J* = 6.7, 2.9 Hz, 2H), 7.48 (dd, *J* = 5.3, 2.0 Hz, 3H), 6.90 (dd, *J* = 8.3, 2.1 Hz, 1H), 6.86 (s, 1H), 6.83 – 6.80 (m, 2H), 6.78 (d, *J* = 8.3 Hz, 1H), 6.75 (d, *J* = 1.9 Hz, 1H), 6.60 (d, *J* = 2.0 Hz, 1H), 3.88 (s, 3H), 3.86 (s, 3H), 3.69 (s, 3H), 3.58 (s, 3H) ppm; <sup>13</sup>C NMR (125 MHz, CDCl<sub>3</sub>): δ 163.0, 157.9, 151.9, 149.5, 148.6, 148.5, 131.5, 130.7, 130.2, 129.0, 126.7, 125.6, 123.6, 122.1, 121.5, 114.1, 112.3, 110.9, 110.8, 104.9, 55.9, 55.9, 55.8, 55.8 ppm; HRMS (ESI-QTOF): *m/z* [M+H]<sup>+</sup> calcd. for C<sub>27</sub>H<sub>25</sub>O<sub>6</sub> 445.1646 found 445.1618.

**6-(3,4-Dimethoxyphenyl)-3-phenyl-5-(3,4,5-trimethoxyphenyl)-2H-pyran-2-one (3g):** 73%

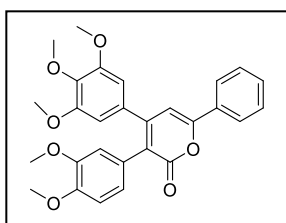

yield (65.4 mg), yellow solid, mp: 152-155 °C, FT-IR (cm)<sup>-1</sup>: 3009, 2833, 1703, 1627, 1585; <sup>1</sup>H NMR (500 MHz, CDCl<sub>3</sub>): δ 7.91 (dd, *J* = 6.6, 3.0 Hz, 2H), 7.49 (dd, *J* = 5.2, 2.0 Hz, 3H), 6.85 (d, *J* = 4.0 Hz, 2H), 6.80 (d, *J* = 8.3 Hz, 1H), 6.72 (d, *J* = 2.0 Hz, 1H), 6.41 (s, 2H), 3.86 (s, 3H), 3.84 (s, 3H), 3.68 (s, 3H), 3.66 (s, 6H) ppm; <sup>13</sup>C NMR (125 MHz, CDCl<sub>3</sub>): δ 162.8, 158.1, 153.1, 152.0, 148.7, 148.6, 133.1, 131.4, 130.8, 129.0, 127.8, 126.5, 125.6, 123.5, 114.0, 110.9, 108.2, 106.3, 104.6, 61.0, 56.2, 55.9, 55.9 ppm; HRMS (ESI-QTOF): *m/z* [M+H]<sup>+</sup> calcd. for C<sub>28</sub>H<sub>27</sub>O<sub>7</sub> 475.1751 found 475.1757.

**5-(Benzo[d][1,3]dioxol-5-yl)-6-(3,4-dimethoxyphenyl)-3-phenyl-2H-pyran-2-one (3h):** 78%

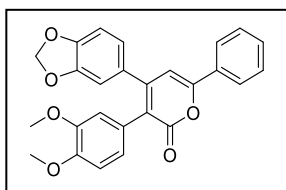

yield (71.2 mg), yellow solid, mp: 153-156 °C, FT-IR (cm)<sup>-1</sup>: 2970, 1707, 1620, 1600, 1537; <sup>1</sup>H NMR (500 MHz, CDCl<sub>3</sub>): δ 7.95–7.86 (m, 2H), 7.52–7.45 (m, 2H), 6.92 (dd, *J* = 8.2, 2.1 Hz, 1H), 6.89–6.80 (m, 3H), 6.78 – 6.68 (m, 3H), 6.61 (d, *J* = 2.1 Hz, 1H), 5.93 (s, 2H), 3.89 (s, 3H), 3.61 (s, 3H) ppm; <sup>13</sup>C NMR (125 MHz, CDCl<sub>3</sub>): δ 162.0, 155.0, 153.3, 151.3, 149.0, 148.7, 148.6, 138.8, 136.9, 132.5, 126.2, 125.8, 124.6, 124.3, 123.5, 113.9, 110.9, 107.2, 106.2, 100.0, 61.0, 56.2, 55.9, 55.9 ppm; HRMS (ESI-QTOF): *m/z* [M+H]<sup>+</sup> calcd. for C<sub>26</sub>H<sub>21</sub>O<sub>6</sub> 429.1333 found 429.1328.

**5-(3-Bromophenyl)-6-(3,4-dimethoxyphenyl)-3-phenyl-2H-pyran-2-one (3i):** 82% yield (73.2

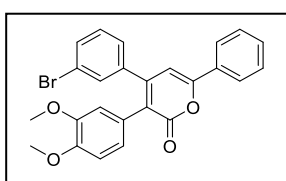

mg), yellow solid, mp: 186-188, FT-IR (cm)<sup>-1</sup>: 2997, 2837, 1711, 1627, 1531; <sup>1</sup>H NMR (500 MHz, CDCl<sub>3</sub>): δ 7.92–7.89 (m, 2H), 7.50–7.47 (m, 3H), 7.43 (d, *J* = 8.9 Hz, 2H), 7.11 (t, *J* = 7.8 Hz, 1H), 7.04

(d,  $J = 7.7$  Hz, 1H), 6.81 (dd,  $J = 8.2, 2.0$  Hz, 1H), 6.77 (d,  $J = 8.5$  Hz, 2H), 6.68 (d,  $J = 2.0$  Hz, 1H), 3.86 (s, 3H), 3.68 (s, 3H) ppm;  $^{13}\text{C}$  NMR (125 MHz,  $\text{CDCl}_3$ ):  $\delta$  162.5, 158.3, 150.6, 148.8, 148.4, 140.2, 131.6, 131.2, 131.2, 130.9, 130.0, 129.0, 127.4, 125.6, 125.5, 123.8, 123.3, 122.5, 114.1, 110.8, 104.4, 55.8, 55.8 ppm; HRMS (ESI-QTOF):  $m/z$   $[\text{M}+\text{H}]^+$  calcd. for  $\text{C}_{25}\text{H}_{19}\text{BrO}_4\text{S}$  463.0539 found 463.0546.

5-(4-Chlorophenyl)-6-(3,4-dimethoxyphenyl)-3-phenyl-2H-pyran-2-one (**3j**): 84% yield (77.2

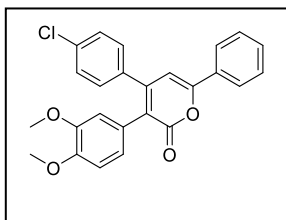

mg), yellow solid, mp: 130-132 °C, FT-IR ( $\text{cm}^{-1}$ ): 2937, 2836, 1703, 1623, 1586;  $^1\text{H}$  NMR (500 MHz,  $\text{CDCl}_3$ ):  $\delta$  7.92–7.88 (m, 2H), 7.48 (d,  $J = 4.3$  Hz, 3H), 7.27 (d,  $J = 2.0$  Hz, 1H), 7.26 (d,  $J = 2.0$  Hz, 1H), 7.16–7.10 (m, 2H), 6.81 (dd,  $J = 8.3, 1.9$  Hz, 1H), 6.79–6.75 (m, 2H), 6.66 (d,  $J = 2.0$  Hz, 1H), 3.86 (s, 3H), 3.67 (s, 3H) ppm;  $^{13}\text{C}$  NMR

(125 MHz,  $\text{CDCl}_3$ ):  $\delta$  162.6, 158.3, 150.9, 148.7, 148.4, 136.5, 134.8, 131.2, 130.8, 130.0, 129.0, 128.8, 125.7, 125.6, 123.7, 123.0, 114.1, 110.8, 104.5, 55.8, 55.7 ppm; HRMS (ESI-QTOF):  $m/z$   $[\text{M}+\text{H}]^+$  calcd. for  $\text{C}_{25}\text{H}_{20}\text{ClO}_4$  419.1045 found 419.1046.

6-(3,4-Dimethoxyphenyl)-3-phenyl-5-(3-(trifluoromethyl)phenyl)-2H-pyran-2-one (**3k**): 81%

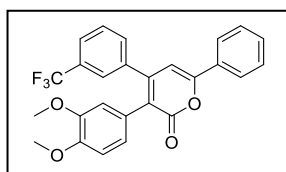

yield (76.9 mg), yellow solid, mp: 142-144 °C, FT-IR ( $\text{cm}^{-1}$ ): 2997, 2936, 1714, 1647, 1587;  $^1\text{H}$  NMR (500 MHz,  $\text{CDCl}_3$ ):  $\delta$  7.90 (dd,  $J = 6.6, 3.0$  Hz, 2H), 7.56 (d,  $J = 8.0$  Hz, 2H), 7.49 (q,  $J = 3.9, 3.3$  Hz, 3H), 7.33 (d,  $J = 8.0$  Hz, 2H), 6.83–6.73 (m, 3H), 6.66–6.62 (m, 1H),

3.85 (s, 3H), 3.63 (s, 3H) ppm;  $^{13}\text{C}$  NMR (125 MHz,  $\text{CDCl}_3$ ):  $\delta$  162.4, 158.5, 150.6, 148.9, 148.4, 141.9, 131.1, 131.0, 129.8 (q,  $J = 282$ ) 129.0, 125.5 (q,  $J = 3.76$ ), 125.4 (q,  $J = 3.73$  Hz), 125.3, 124.8, 123.8, 123.5, 114.1, 110.8, 104.3, 55.8, 55.7 ppm;  $^{19}\text{F}$  NMR (470 MHz,  $\text{CDCl}_3$ ):  $\delta$  -60.7 ppm, HRMS (ESI-QTOF):  $m/z$   $[\text{M}+\text{H}]^+$  calcd. for  $\text{C}_{26}\text{H}_{20}\text{F}_3\text{O}_4$  453.1308 found 453.1356.

6-(3,4-Dimethoxyphenyl)-5-(4-nitrophenyl)-3-phenyl-2H-pyran-2-one (**3l**): 78% yield (73.0

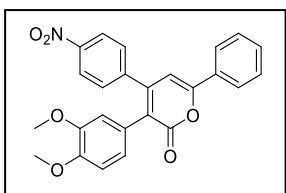

mg), yellow solid, mp: 166-169 °C, FT-IR ( $\text{cm}^{-1}$ ): 3005, 2968, 1715, 1627, 1544;  $^1\text{H}$  NMR (500 MHz,  $\text{CDCl}_3$ ):  $\delta$  8.15 (d,  $J = 8.7$  Hz, 2H), 7.90 (dt,  $J = 5.4, 1.7$  Hz, 2H), 7.52–7.48 (m, 3H), 7.41–7.37 (m, 2H), 6.78 (s, 1H), 6.74–6.67 (m, 3H), 3.85 (s, 3H), 3.70 (s, 3H) ppm;  $^{13}\text{C}$

NMR (125 MHz,  $\text{CDCl}_3$ ):  $\delta$  162.2, 158.8, 149.8, 149.1, 148.6, 147.5, 144.8, 131.1, 131.0,



129.7, 129.1, 125.6, 125.1, 123.8, 123.7, 113.9, 110.9, 103.8, 55.8, 55.8 ppm; HRMS (ESI-QTOF):  $m/z$   $[M+H]^+$  calcd. for  $C_{25}H_{20}NO_6$  430.1285 found 430.1286.

4-(6-(3,4-Dimethoxyphenyl)-2-oxo-3-phenyl-2H-pyran-5-yl)benzonitrile (**3m**): 80% yield

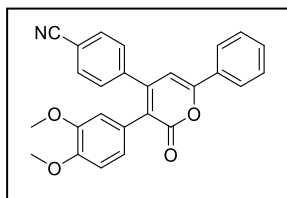

(74.1 mg), yellow solid, mp: 148-150 °C, FT-IR (cm)<sup>-1</sup>: 2937, 2227, 1714, 1626, 1581; <sup>1</sup>H NMR (500 MHz, CDCl<sub>3</sub>): δ 7.89 (dd,  $J$  = 6.8, 3.0 Hz, 2H), 7.58 (d,  $J$  = 7.9 Hz, 2H), 7.50–7.47 (m, 4H), 7.32 (d,  $J$  = 8.0 Hz, 2H), 6.76 (s, 1H), 6.73–6.71 (m, 1H), 6.69 (s, 1H), 3.85 (s, 3H), 3.68 (s, 3H) ppm; <sup>13</sup>C NMR (125 MHz, CDCl<sub>3</sub>): δ 157.5, 154.0, 145.3, 144.3, 143.8, 138.1, 127.5, 126.3, 126.3, 124.6, 124.3, 120.8, 120.4, 119.1, 118.9, 113.4, 109.2, 107.7, 106.1, 99.1, 51.1 ppm; HRMS (ESI-QTOF):  $m/z$   $[M+H]^+$  calcd. for  $C_{26}H_{20}NO_4$  410.1387 found 410.1393.

6-(3,4-Dimethoxyphenyl)-3-phenyl-5-(thiophen-2-yl)-2H-pyran-2-one (**3n**): 70% yield (65.8

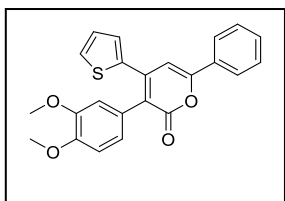

mg), yellow solid, mp: 180-183 °C, FT-IR (cm)<sup>-1</sup>: 3079, 2964, 1689, 1578, 1540; <sup>1</sup>H NMR (500 MHz, CDCl<sub>3</sub>): δ 7.93–7.90 (m, 2H), 7.49 (dd,  $J$  = 5.2, 2.0 Hz, 3H), 7.37 (dd,  $J$  = 5.1, 1.2 Hz, 1H), 7.15 (dd,  $J$  = 3.7, 1.2 Hz, 1H), 7.03 (d,  $J$  = 1.1 Hz, 1H), 6.98–6.96 (m, 1H), 6.95–6.90 (m, 2H), 6.80 (d,  $J$  = 1.8 Hz, 1H), 3.93 (s, 3H), 3.80 (s, 3H) ppm; <sup>13</sup>C NMR (125 MHz, CDCl<sub>3</sub>): δ 163.0, 157.9, 149.4, 149.4, 144.5, 139.0, 131.5, 130.8, 130.2, 130.1, 129.0, 127.2, 126.5, 125.6, 123.2, 121.1, 113.5, 111.6, 102.9, 55.9, 55.9 ppm; HRMS (ESI-QTOF):  $m/z$   $[M+H]^+$  calcd. for  $C_{23}H_{19}O_4S$  391.0999 found 391.1028.

6-(3,4-Dimethoxyphenyl)-3-(*p*-tolyl)-5-(3,4,5-trimethoxyphenyl)-2H-pyran-2-one (**3p**): 78%

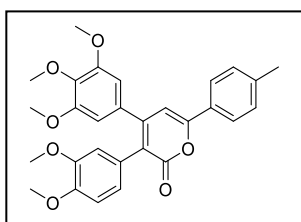

yield (71.2 mg), yellow solid, mp: 174-176 °C, FT-IR (cm)<sup>-1</sup>: 2941, 2841, 1703, 1622, 1581; <sup>1</sup>H NMR (500 MHz, CDCl<sub>3</sub>): δ 7.81 (d,  $J$  = 8.3 Hz, 2H), 7.31–7.28 (m, 2H), 6.85 (dd,  $J$  = 8.3, 2.0 Hz, 1H), 6.81–6.77 (m, 2H), 6.71 (d,  $J$  = 2.0 Hz, 1H), 6.41 (s, 2H), 3.86 (s, 3H), 3.84 (s, 3H), 3.68 (s, 3H), 3.66 (s, 6H), 2.43 (s, 3H) ppm; <sup>13</sup>C NMR (125 MHz, CDCl<sub>3</sub>): δ 162.9, 158.3, 153.1, 152.2, 148.6, 148.5, 141.3, 138.4, 133.2, 129.7, 128.6, 126.6, 125.5, 123.5, 122.1, 114.0, 110.9, 106.2, 104.0, 61.0, 56.2, 55.9, 55.8, 21.5 ppm; HRMS (ESI-QTOF):  $m/z$   $[M+H]^+$  calcd. for  $C_{29}H_{29}O_7$  489.1909 found 489.1948.

6-(3,4-Dimethoxyphenyl)-3-(4-methoxyphenyl)-5-(3,4,5-trimethoxyphenyl)-2H-pyran-2-one

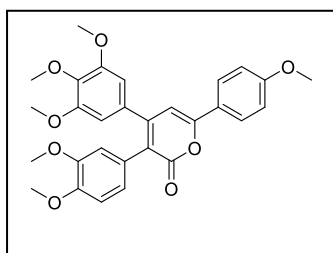

(**3q**): 76% yield (71.6 mg), yellow solid, mp: 161-163 °C, FT-IR (cm)<sup>-1</sup>: 2933, 2896, 1708, 1620, 1604; <sup>1</sup>H NMR (500 MHz, CDCl<sub>3</sub>): δ 7.88–7.84 (m, 2H), 6.99 (d, *J* = 8.9 Hz, 2H), 6.85 (dd, *J* = 8.3, 2.0 Hz, 1H), 6.81–6.77 (m, 1H), 6.74 (s, 1H), 6.70 (d, *J* = 2.0 Hz, 1H), 6.41 (s, 2H), 3.88 (s, 3H), 3.85 (s, 3H), 3.83 (s, 3H), 3.68 (s, 3H), 3.66 (s, 6H) ppm; <sup>13</sup>C NMR (125 MHz, CDCl<sub>3</sub>): δ 162.9, 161.8, 158.3, 153.1, 152.4, 148.6, 148.5, 138.4, 133.3, 127.3, 126.7, 123.9, 123.5, 121.3, 114.4, 114.1, 114.1, 110.9, 106.3, 103.2, 61.0, 56.2, 55.9, 55.8, 55.5 ppm; HRMS (ESI-QTOF): *m/z* [M+H]<sup>+</sup> calcd. for C<sub>29</sub>H<sub>29</sub>O<sub>8</sub> 505.1857 found 505.1860.

6-(3,4-Dimethoxyphenyl)-3-(4-fluorophenyl)-5-(3,4,5-trimethoxyphenyl)-2H-pyran-2-one

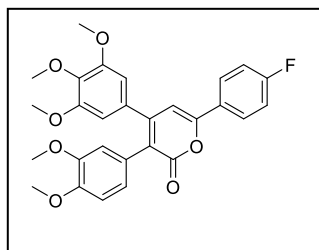

(**3r**): 79% yield (72.7 mg), yellow solid, mp: 160-163 °C, FT-IR (cm)<sup>-1</sup>: 2971, 1710, 1625, 1582, 1523; <sup>1</sup>H NMR (500 MHz, CDCl<sub>3</sub>): δ 7.93–7.88 (m, 2H), 7.18 (t, *J* = 8.6 Hz, 2H), 6.85 (dd, *J* = 8.2, 2.0 Hz, 1H), 6.81–6.77 (m, 2H), 6.71 (d, *J* = 2.0 Hz, 1H), 6.40 (s, 2H), 3.86 (s, 3H), 3.84 (s, 3H), 3.68 (s, 3H), 3.66 (s, 6H) ppm; <sup>13</sup>C NMR (125 MHz, CDCl<sub>3</sub>): δ 164.2 (d, *J* = 252.2 Hz), 163.2, 162.6, 157.1, 153.1, 152.1, 148.7, 148.6, 138.5, 133.0, 127.7 (d, *J* = 8.6 Hz), 126.3, 123.5, 122.4, 116.2 (d, *J* = 21.8 Hz), 114.0, 110.9, 106.2, 104.4, 61.0, 56.2, 55.9, 55.9 ppm; <sup>19</sup>F NMR (470 MHz, CDCl<sub>3</sub>): δ -106.1 ppm; HRMS (ESI-QTOF): *m/z* [M+H]<sup>+</sup> calcd. for C<sub>28</sub>H<sub>26</sub>FO<sub>7</sub> 493.1657 found 493.1655.

3-(3,5-Dichlorophenyl)-6-(3,4-dimethoxyphenyl)-5-(3,4,5-trimethoxyphenyl)-2H-pyran-2-one

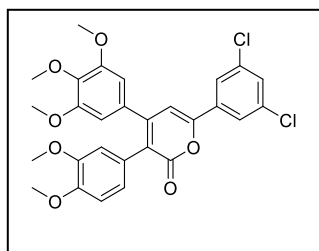

(**3s**): 82% yield (89.6 mg), yellow solid, mp: 141-143 °C, FT-IR (cm)<sup>-1</sup>: 2938, 1713, 1630, 1588, 1563; <sup>1</sup>H NMR (500 MHz, CDCl<sub>3</sub>): δ 7.78 (d, *J* = 1.8 Hz, 2H), 7.45 (t, *J* = 1.8 Hz, 1H), 6.86 (dd, *J* = 8.3, 2.0 Hz, 1H), 6.83 (s, 1H), 6.80 (d, *J* = 8.3 Hz, 1H), 6.70 (d, *J* = 2.0 Hz, 1H), 6.39 (s, 2H), 3.86 (s, 3H), 3.84 (s, 3H), 3.68 (s, 3H), 3.67 (s, 6H) ppm; <sup>13</sup>C NMR (125 MHz, CDCl<sub>3</sub>): δ 162.0, 154.8, 153.2, 151.5, 148.9, 148.6, 138.7, 135.9, 134.1, 132.6, 130.4, 125.9, 124.0, 123.8, 123.5, 113.8, 110.9, 106.2, 106.0, 61.0, 56.2, 55.9, 55.9 ppm; HRMS (ESI-QTOF): *m/z* [M+H]<sup>+</sup> calcd. for C<sub>28</sub>H<sub>25</sub>Cl<sub>2</sub>O<sub>7</sub> 543.0972 found 543.0966.

**6-(3,4-Dimethoxyphenyl)-3-(4-nitrophenyl)-5-(3,4,5-trimethoxyphenyl)-2H-pyran-2-one (3t):**

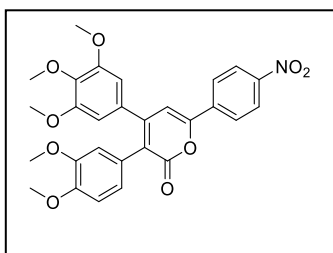

83% yield (86.8 mg), yellow solid, mp: 133-137 °C, FT-IR (cm)<sup>-1</sup>: 2939, 1716, 1583, 1517, 1416; <sup>1</sup>H NMR (500 MHz, CDCl<sub>3</sub>): δ 8.34 (d, *J* = 9.0 Hz, 2H), 8.10–8.05 (m, 2H), 6.99 (s, 1H), 6.88 (dd, *J* = 8.3, 2.0 Hz, 1H), 6.81 (d, *J* = 8.3 Hz, 1H), 6.72 (d, *J* = 2.0 Hz, 1H), 6.41 (s, 2H), 3.87 (s, 3H), 3.85 (s, 3H), 3.68 (s, 3H), 3.67 (s, 6H) ppm; <sup>13</sup>C NMR (125 MHz, CDCl<sub>3</sub>): δ 162.9, 158.0, 152.1, 149.6, 148.5, 147.5, 147.1, 131.5, 130.7, 130.0, 128.9, 128.8, 128.0, 127.8, 125.6, 124.7, 121.5, 112.3, 111.2, 110.9, 108.3, 104.8, 101.0, 55.9, 55.7, 55.3 ppm; HRMS (ESI-QTOF): *m/z* [M+H]<sup>+</sup> calcd. for C<sub>28</sub>H<sub>26</sub>NO<sub>9</sub> 520.1602 found 520.1597.

**6-(3,4-Dimethoxyphenyl)-3-(naphthalen-2-yl)-5-(3,4,5-trimethoxyphenyl)-2H-pyran-2-one (3v):**

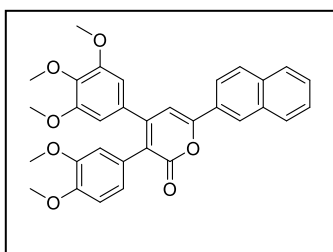

85% yield (89.8 mg), yellow solid, mp: 166-168 °C, FT-IR (cm)<sup>-1</sup>: 2969, 1711, 1622, 1582, 1530; <sup>1</sup>H NMR (500 MHz, CDCl<sub>3</sub>): δ 8.52 (t, *J* = 1.1 Hz, 1H), 8.00–7.92 (m, 1H), 7.93–7.85 (m, 3H), 7.61–7.54 (m, 2H), 6.98 (s, 1H), 6.89 (dd, *J* = 8.3, 2.0 Hz, 1H), 6.81 (d, *J* = 8.3 Hz, 1H), 6.74 (d, *J* = 2.0 Hz, 1H), 6.45 (s, 2H), 3.87 (s, 3H), 3.85 (s, 3H), 3.69 (s, 3H), 3.68 (s, 6H) ppm; <sup>13</sup>C NMR (125 MHz, CDCl<sub>3</sub>): δ 162.8, 158.0, 153.2, 152.1, 148.7, 148.6, 138.5, 134.3, 133.2, 133.2, 129.0, 128.8, 128.4, 127.8, 127.7, 127.0, 126.5, 126.1, 123.6, 122.0, 114.1, 111.0, 106.3, 105.0, 61.0, 56.2, 55.9, 55.9 ppm; HRMS (ESI-QTOF): *m/z* [M+H]<sup>+</sup> calcd. for C<sub>32</sub>H<sub>29</sub>O<sub>7</sub> 525.1908 found 525.1899.

**E-6-(3,4-Dimethoxyphenyl)-3-styryl-5-(3,4,5-trimethoxyphenyl)-2H-pyran-2-one (3w):**

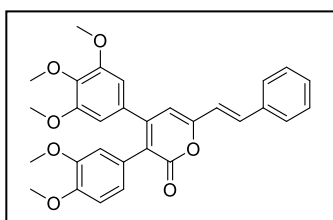

80% yield (80.6 mg), yellow solid, mp: 144-146 °C, FT-IR (cm)<sup>-1</sup>: 2942, 2841, 1709, 1622, 1582; <sup>1</sup>H NMR (500 MHz, CDCl<sub>3</sub>): δ 7.55 (d, *J* = 7.6 Hz, 2H), 7.40 (t, *J* = 7.5 Hz, 3H), 7.36 (d, *J* = 7.1 Hz, 1H), 6.89–6.77 (m, 3H), 6.75–6.67 (m, 2H), 6.38 (s, 2H), 3.86 (s, 3H), 3.83 (s, 3H), 3.68 (s, 3H), 3.65 (s, 6H) ppm; <sup>13</sup>C NMR (125 MHz, CDCl<sub>3</sub>): δ 162.6, 156.8, 153.1, 151.9, 148.7, 135.5, 135.1, 132.8, 129.4, 129.0, 127.4, 126.6, 123.5, 122.7, 118.7, 114.0, 110.9, 108.5, 106.2, 61.0, 56.1, 55.9, 55.9 ppm; HRMS (ESI-QTOF): *m/z* [M+H]<sup>+</sup> calcd. for C<sub>30</sub>H<sub>29</sub>O<sub>7</sub> 501.1908 found 501.1909.

6-(3,4-Dimethoxyphenyl)-3,5-bis(3,4,5-trimethoxyphenyl)-2H-pyran-2-one (**3x**): 70% yield

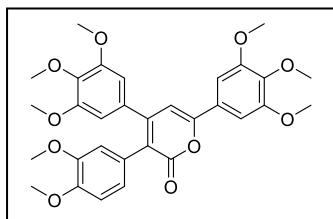

(79.6 mg), yellow solid, mp: 150-153 °C, FT-IR (cm)<sup>-1</sup>: 2814, 2156, 1718, 1678, 1589; <sup>1</sup>H NMR (500 MHz, CDCl<sub>3</sub>): δ 7.10 (s, 2H), 6.85 (dd, *J* = 8.2, 1.9 Hz, 1H), 6.80 (d, *J* = 8.3 Hz, 1H), 6.75 (s, 1H), 6.71 (d, *J* = 1.9 Hz, 1H), 6.41 (s, 2H), 3.95 (s, 6H), 3.92 (s, 3H), 3.86 (s, 3H), 3.84 (s, 3H), 3.68 (s, 3H), 3.67 (s, 6H) ppm; <sup>13</sup>C NMR (125 MHz, CDCl<sub>3</sub>): δ 162.8, 157.9, 153.6, 153.2, 152.2, 148.7, 148.5, 140.6, 138.5, 133.2, 126.8, 126.4, 123.5, 122.2, 114.0, 110.9, 106.2, 104.4, 103.1, 61.0, 61.0, 56.5, 56.2, 55.9, 55.8 ppm; HRMS (ESI-QTOF): *m/z* [M+H]<sup>+</sup> calcd. for C<sub>31</sub>H<sub>33</sub>O<sub>10</sub> 565.2068 found 565.2068.

3,4-Diphenyl-7,8-dihydro-2H-chromene-2,5(6H)-dione (**5a**): 85% yield (83.9 mg), yellow

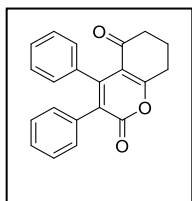

solid, mp: 171-173 °C, FT-IR (cm)<sup>-1</sup>: 3062, 2906, 1731, 1676, 1594; <sup>1</sup>H NMR (500 MHz, CDCl<sub>3</sub>): δ 7.18–7.13 (m, 6H), 7.00–6.97 (m, 2H), 6.91–6.88 (m, 2H), 3.00 (t, *J* = 6.4 Hz, 2H), 2.54–2.50 (m, 2H), 2.18 (dq, *J* = 7.8, 6.4 Hz, 2H) ppm; <sup>13</sup>C NMR (125 MHz, CDCl<sub>3</sub>): δ 193.3, 173.0, 160.4, 152.1, 136.3, 132.8, 130.4, 127.8, 127.7, 127.6, 127.5, 127.4, 126.1, 115.0, 38.5, 29.1, 19.8 ppm; HRMS (ESI-QTOF): *m/z* [M+H]<sup>+</sup> calcd. for C<sub>21</sub>H<sub>17</sub>O<sub>3</sub> 317.1172 found 317.1170.

3,4-Bis(3,4-dimethoxyphenyl)-7,8-dihydro-2H-chromene-2,5(6H)-dione (**5b**): 71% yield (62.9

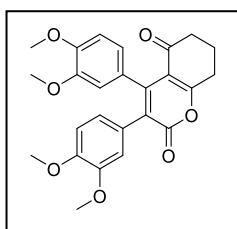

mg), yellow solid, mp: 175-178 °C, FT-IR (cm)<sup>-1</sup>: 3011, 1730, 1689, 1517, 1511; <sup>1</sup>H NMR (500 MHz, CDCl<sub>3</sub>): δ 6.71 (d, *J* = 8.3 Hz, 2H), 6.66 (dd, *J* = 8.3, 2.0 Hz, 1H), 6.50 (dd, *J* = 8.2, 2.0 Hz, 1H), 6.45 (d, *J* = 2.0 Hz, 1H), 6.39 (d, *J* = 2.0 Hz, 1H), 3.83 (s, 3H), 3.82 (s, 3H), 3.62 (s, 3H), 3.61 (s, 3H), 2.98 (t, *J* = 6.3 Hz, 2H), 2.54 (t, *J* = 6.7 Hz, 2H), 2.18 (p, *J* = 6.4 Hz, 2H) ppm; <sup>13</sup>C NMR (125 MHz, CDCl<sub>3</sub>): δ 193.4, 172.6, 160.6, 151.3, 148.5, 148.4, 148.3, 148.2, 128.8, 125.6, 125.4, 123.2, 120.8, 115.2, 113.8, 112.0, 110.5, 110.2, 55.8, 55.7, 55.7, 38.6, 29.1, 19.9 ppm; HRMS (ESI-QTOF): *m/z* [M+H]<sup>+</sup> calcd. for C<sub>25</sub>H<sub>25</sub>O<sub>7</sub> 437.1595 found 437.1583.

*3-(3,4-Dimethoxyphenyl)-4-(3,4,5-trimethoxyphenyl)-7,8-dihydro-2H-chromene-2,5(6H)-*

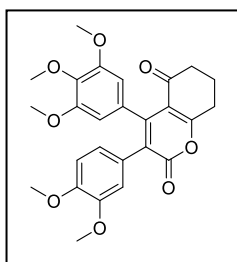

*dione (5c)*: 70% yield (65.8mg), yellow solid, mp: 176-179 °C, FT-IR (cm)<sup>-1</sup>: 3090, 1738, 1699, 1654, 1513; <sup>1</sup>H NMR (500 MHz, CDCl<sub>3</sub>): δ 6.72 (d, *J* = 8.3 Hz, 1H), 6.68 (dd, *J* = 8.3, 2.0 Hz, 1H), 6.46 (d, *J* = 2.0 Hz, 1H), 6.13 (s, 2H), 3.81 (d, *J* = 2.7 Hz, 6H), 3.62 (d, *J* = 3.7 Hz, 9H), 2.99 (t, *J* = 6.3 Hz, 2H), 2.55 (t, *J* = 6.7 Hz, 2H), 2.19 (p, *J* = 6.5 Hz, 2H)

ppm; <sup>13</sup>C NMR (125 MHz, CDCl<sub>3</sub>): δ 193.1, 172.7, 160.4, 152.7, 151.2, 148.5, 148.2, 137.6, 131.7, 125.6, 125.3, 123.1, 114.9, 113.6, 110.5, 106.1, 61.0, 56.1, 55.8, 55.7, 38.5, 29.1, 19.9 ppm; HRMS (ESI-QTOF): *m/z* [M+H]<sup>+</sup> calcd. for C<sub>26</sub>H<sub>27</sub>O<sub>8</sub> 467.1700 found 467.1690.

*3-(3,4-Dimethoxyphenyl)-4-(p-tolyl)-7,8-dihydro-1H-isochromene-1,5(6H)-dione (5d)*: 79%

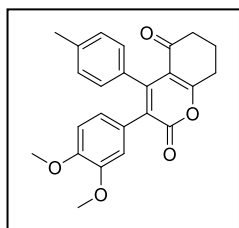

yield (72.3 mg), yellow solid, mp: 179-181 °C, FT-IR (cm)<sup>-1</sup>: 3014, 2899, 1727, 1627, 1596; <sup>1</sup>H NMR (500 MHz, CDCl<sub>3</sub>): δ 6.99 (d, *J* = 7.7 Hz, 2H), 6.79 (d, *J* = 7.7 Hz, 2H), 6.73 (d, *J* = 1.9 Hz, 2H), 6.35 (s, 1H), 3.82 (s, 3H), 3.56 (s, 3H), 2.98 (t, *J* = 6.3 Hz, 2H), 2.51 (t, *J* = 6.6 Hz, 2H), 2.28 (s, 3H), 2.17 (p, *J* = 6.4 Hz, 2H) ppm; <sup>13</sup>C NMR (125 MHz, CDCl<sub>3</sub>): δ

193.5, 172.6, 160.6, 151.8, 148.2, 147.9, 137.2, 133.6, 128.3, 127.8, 125.5, 125.1, 123.4, 115.2, 113.9, 110.4, 55.7, 55.6, 38.5, 29.1, 21.3, 19.9 ppm; HRMS (ESI-QTOF): *m/z* [M+H]<sup>+</sup> calcd. for C<sub>24</sub>H<sub>23</sub>O<sub>5</sub> 391.1540 found 391.1575.

*4-(3-Bromophenyl)-3-(3,4-dimethoxyphenyl)-7,8-dihydro-2H-chromene-2,5(6H)-dione (5e)*:

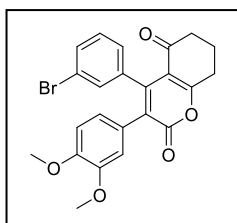

81% yield (71.1 mg), yellow solid, mp: 138-141 °C, FT-IR (cm)<sup>-1</sup>: 2954, 2833, 1729, 1681, 1592; <sup>1</sup>H NMR (500 MHz, CDCl<sub>3</sub>): δ 7.32 (ddd, *J* = 8.0, 2.0, 1.0 Hz, 1H), 7.13 (t, *J* = 1.8 Hz, 1H), 7.05 (t, *J* = 7.9 Hz, 1H), 6.82 (ddd, *J* = 7.7, 1.6, 1.0 Hz, 1H), 6.73 (d, *J* = 8.3 Hz, 1H), 6.68 (dd, *J* = 8.3, 2.0 Hz, 1H), 6.39 (d, *J* = 2.0 Hz, 1H), 3.82 (s, 3H), 3.64 (s, 3H),

2.99 (t, *J* = 6.3 Hz, 2H), 2.52 (t, *J* = 6.6 Hz, 2H), 2.18 (p, *J* = 6.5 Hz, 2H) ppm; <sup>13</sup>C NMR (125 MHz, CDCl<sub>3</sub>): δ 193.2, 173.0, 160.3, 149.9, 148.5, 148.1, 138.7, 130.8, 130.5, 129.2, 126.4, 126.1, 124.5, 123.3, 121.5, 114.6, 113.7, 110.5, 55.8, 55.7, 38.4, 29.1, 19.8 ppm; HRMS (ESI-QTOF): *m/z* [M+H]<sup>+</sup> calcd. for C<sub>23</sub>H<sub>20</sub>BrO<sub>5</sub> 455.0489 found 455.0444.

3-(3,4-Dimethoxyphenyl)-4-(3-(trifluoromethyl)phenyl)-7,8-dihydro-2H-chromene-2,5(6H)-

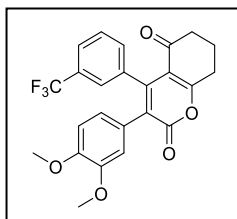

dione (**5f**): 84% yield (74.1 mg), yellow solid, mp: 185-188 °C, FT-IR (cm)<sup>-1</sup>: 2956, 1725, 1680, 1601, 1539; <sup>1</sup>H NMR (500 MHz, CDCl<sub>3</sub>): δ 7.49–7.43 (m, 2H), 7.10–7.03 (m, 2H), 6.70 (d, *J* = 8.3 Hz, 1H), 6.64 (dd, *J* = 8.3, 2.0 Hz, 1H), 6.36 (d, *J* = 2.0 Hz, 1H), 3.81 (s, 3H), 3.58 (s, 3H), 3.00 (t, *J* = 6.3 Hz, 2H), 2.52 (dd, *J* = 7.4, 6.0 Hz, 2H), 2.28–2.09 (m, 2H)

ppm; <sup>13</sup>C NMR (125 MHz, CDCl<sub>3</sub>): δ 193.3, 173.2, 160.2, 149.8, 148.7, 148.2, 140.5, 129.7, 129.4 (q, *J* = 280 Hz), 128.3, 126.1, 125.0, 124.5 (q, *J* = 3.8 Hz), 124.2, 123.4, 114.6, 113.7, 110.5, 55.7, 55.7, 38.3, 29.1, 19.8 ppm; <sup>19</sup>F NMR (470 MHz, CDCl<sub>3</sub>): δ -62.6 ppm; HRMS (ESI-QTOF): *m/z* [M+H]<sup>+</sup> calcd. for C<sub>24</sub>H<sub>20</sub>F<sub>3</sub>O<sub>5</sub> 445.1257 found 445.1274.

3-(3,4-Dimethoxyphenyl)-4-(4-nitrophenyl)-7,8-dihydro-2H-chromene-2,5(6H)-dione

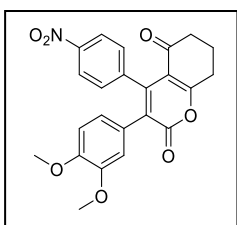

(**5g**): 80% yield (71.6 mg), yellow solid, mp: 220-222 °C, FT-IR (cm)<sup>-1</sup>: 2960, 2837, 1722, 1679, 1534; <sup>1</sup>H NMR (500 MHz, CDCl<sub>3</sub>): δ 8.07 (d, *J* = 8.7 Hz, 2H), 7.11 (d, *J* = 8.7 Hz, 2H), 6.66 (d, *J* = 8.4 Hz, 1H), 6.55 (dd, *J* = 8.3, 2.0 Hz, 1H), 6.45 (d, *J* = 2.1 Hz, 1H), 3.80 (s, 3H), 3.65 (s, 3H), 3.01 (t, *J* = 6.3 Hz, 2H), 2.52 (dd, *J* = 7.4, 5.9 Hz, 2H), 2.20 (p, *J* = 6.4

Hz, 2H) ppm; <sup>13</sup>C NMR (125 MHz, CDCl<sub>3</sub>): δ 193.3, 173.6, 159.9, 149.1, 148.9, 148.3, 146.8, 143.8, 128.9, 126.3, 124.0, 123.3, 122.9, 114.3, 113.4, 110.6, 55.8, 55.7, 38.2, 29.1, 19.8 ppm; HRMS (ESI-QTOF): *m/z* [M+H]<sup>+</sup> calcd. for C<sub>23</sub>H<sub>20</sub>NO<sub>7</sub> 422.1234 found 422.1247.

3-(3,4-Dimethoxyphenyl)-4-(furan-2-yl)-7,8-dihydro-2H-chromene-2,5(6H)-dione (**5h**): 68%

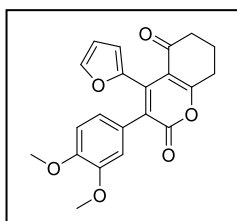

yield (63.5 mg), yellow solid, mp: 133-135 °C, FT-IR (cm)<sup>-1</sup>: 2814, 1713, 1698, 1609, 1562; <sup>1</sup>H NMR (500 MHz, CDCl<sub>3</sub>): δ 7.44 (d, *J* = 1.8 Hz, 1H), 6.83 (d, *J* = 8.3 Hz, 1H), 6.78 (dd, *J* = 8.2, 2.0 Hz, 1H), 6.56 (d, *J* = 2.0 Hz, 1H), 6.28 (dd, *J* = 3.4, 1.8 Hz, 1H), 5.82 (d, *J* = 3.4 Hz, 1H), 3.87 (s, 3H), 3.84 (s, 3H), 2.95 (t, *J* = 6.3 Hz, 2H), 2.58 (t, *J* = 6.7 Hz, 2H), 2.19

(p, *J* = 6.4 Hz, 2H) ppm; <sup>13</sup>C NMR (125 MHz, CDCl<sub>3</sub>): δ 192.8, 172.4, 148.5, 147.5, 142.7, 125.3, 122.5, 112.9, 111.7, 111.4, 110.8, 55.8, 38.0, 28.9, 19.9 ppm; HRMS (ESI-QTOF): *m/z* [M+H]<sup>+</sup> calcd. for C<sub>21</sub>H<sub>19</sub>O<sub>6</sub> 367.1176 found 367.1190.

**3-(3,4-Dimethoxyphenyl)-4-(thiophen-2-yl)-7,8-dihydro-2H-chromene-2,5(6H)-dione (5i):**

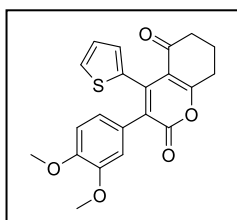

65% yield (59.9 mg), yellow solid, mp: 160-163 °C, FT-IR (cm)<sup>-1</sup>: 2888, 2150, 1717, 1673, 1599; <sup>1</sup>H NMR (500 MHz, CDCl<sub>3</sub>): δ 7.41–7.35 (m, 1H), 7.14 (dd, *J* = 3.5, 1.2 Hz, 1H), 7.11 (dd, *J* = 8.5, 2.0 Hz, 1H), 7.07 (dd, *J* = 5.2, 3.5 Hz, 1H), 6.93 (d, *J* = 2.1 Hz, 1H), 6.81 (d, *J* = 8.4 Hz, 1H), 3.88 (s, 3H), 3.67 (s, 3H), 2.98 (t, *J* = 6.3 Hz, 2H), 2.57–2.48 (m, 2H), 2.22 (p, *J* = 6.2 Hz, 2H) ppm; <sup>13</sup>C NMR (125 MHz, CDCl<sub>3</sub>): δ 193.7, 165.6, 150.5, 149.1, 148.6, 132.8, 128.4, 127.1, 126.4, 122.4, 121.6, 119.2, 111.1, 111.0, 109.5, 109.5, 55.9, 55.5, 38.6, 23.7, 22.4 ppm; HRMS (ESI-QTOF): *m/z* [M+H]<sup>+</sup> calcd. for C<sub>21</sub>H<sub>19</sub>O<sub>5</sub>S 383.0948 found 383.1000.

**7,7-Dimethyl-3,4-diphenyl-7,8-dihydro-2H-chromene-2,5(6H)-dione (5j):** 77% yield (82.7

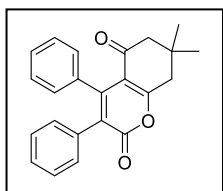

mg), yellow solid, mp: 189-191 °C, FT-IR (cm)<sup>-1</sup>: 2961, 1787, 1696, 1608; <sup>1</sup>H NMR (500 MHz, CDCl<sub>3</sub>): δ 7.19–7.12 (m, 6H), 7.03–6.96 (m, 2H), 6.90–6.86 (m, 2H), 2.86 (s, 2H), 2.40 (s, 2H), 1.19 (s, 6H) ppm; <sup>13</sup>C NMR (125 MHz, CDCl<sub>3</sub>): δ 193.4, 171.6, 160.7, 151.8, 136.1, 132.8, 130.4, 127.9, 127.7, 127.6, 127.6, 127.5, 127.4, 125.8, 114.1, 52.6, 42.7, 32.0, 28.3 ppm; HRMS (ESI-QTOF): *m/z* [M+H]<sup>+</sup> calcd. for C<sub>23</sub>H<sub>21</sub>O<sub>3</sub> 345.1485 found 345.1481.

**3,4,7-Triphenyl-7,8-dihydro-2H-chromene-2,5(6H)-dione (5l):** 82% yield (100.4 mg), yellow

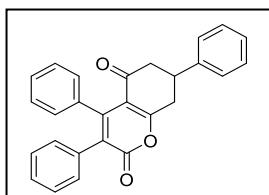

solid, mp: 160-162 °C, FT-IR (cm)<sup>-1</sup>: 3023, 1735, 1685, 1672, 1611; <sup>1</sup>H NMR (500 MHz, CDCl<sub>3</sub>): δ 7.40 (dd, *J* = 8.2, 6.9 Hz, 2H), 7.36–7.28 (m, 1H), 7.31–7.26 (m, 2H), 7.21–7.13 (m, 6H), 7.04–6.97 (m, 2H), 6.92 (s, 2H), 3.57 (p, *J* = 8.4 Hz, 1H), 3.24–3.19 (m, 2H), 2.78 (d, *J* = 8.6 Hz, 2H) ppm; <sup>13</sup>C NMR (125 MHz, CDCl<sub>3</sub>): δ 192.5, 172.1, 160.4, 151.9, 141.2, 136.1, 132.7, 130.4, 129.1, 127.9, 127.8, 127.7, 127.6, 127.6, 127.5, 126.6, 126.2, 114.7, 45.5, 37.9, 36.5 ppm; HRMS (ESI-QTOF): *m/z* [M+H]<sup>+</sup> calcd. for C<sub>27</sub>H<sub>21</sub>O<sub>3</sub> 393.1485 found 393.1498

**3,4-Diphenyl-7-(p-tolyl)-7,8-dihydro-2H-chromene-2,5(6H)-dione (5m):** 81% yield (102.7

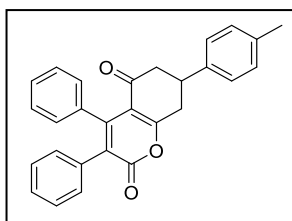

mg), yellow solid, mp: 166-168 °C, FT-IR (cm)<sup>-1</sup>: 3022, 1718, 1699, 1534, 1511; <sup>1</sup>H NMR (500 MHz, CDCl<sub>3</sub>): δ 7.22–7.12 (m, 10H), 7.00 (dd, *J* = 6.9, 2.6 Hz, 2H), 6.92 (s, 2H), 3.53 (p, *J* = 8.5 Hz, 1H), 3.20 (d, *J* = 9.3 Hz, 2H), 2.75 (d, *J* = 8.5 Hz, 2H), 2.36 (s, 3H) ppm; <sup>13</sup>C NMR (125 MHz, CDCl<sub>3</sub>): δ 192.6, 172.2, 160.4, 151.9, 138.2, 137.3,

136.1, 132.7, 130.4, 129.7, 127.9, 127.7, 127.7, 127.6, 127.5, 126.4, 126.2, 114.7, 45.6, 37.5, 36.7, 21.1 ppm; HRMS (ESI-QTOF):  $m/z$ .  $[M+H]^+$  calcd. For  $C_{28}H_{23}O_3$  407.1642 found 407.1645.

## 6. Mechanistic studies for ruthenium-catalyzed $\alpha$ -pyrone synthesis

### 6.1. Competitive reaction between *cis*-stilbene acids

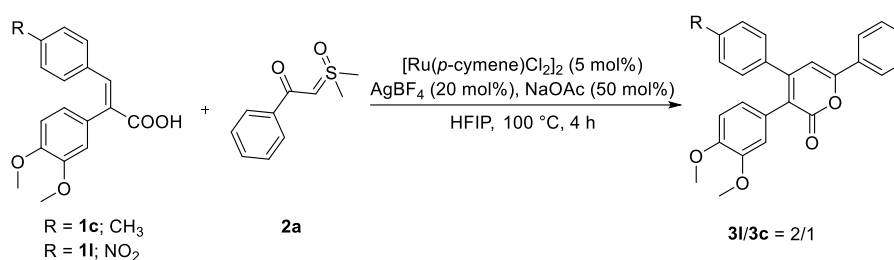

A pressure tube with a magnetic stir bar was charged with **1c** (1.0 equiv.), **1I** (1.0 equiv.), **2a** (1.2 equiv.),  $[Ru(p\text{-cymene})Cl_2]_2$  (5.0 mol%),  $AgBF_4$  (20 mol%), NaOAc (50 mol%) and HFIP (1 mL). The resulting mixture was stirred at 100 °C for 4 h. After 4 h, trimethoxy benzene (1.0 equiv.) was added to the reaction mixture as the standard. Thereafter, the reaction solvent was evaporated under reduced pressure and the crude product containing mixture of the product **3** and **3I** was directly submitted for  $^1H$  NMR analysis. The  $^1H$  NMR analysis demonstrated that the compounds **3I/3c** have been formed with the ratio of 2/1. It indicated that, the reaction rate of the electron deficient substrate is twice than the reaction rate of electron rich substrate.



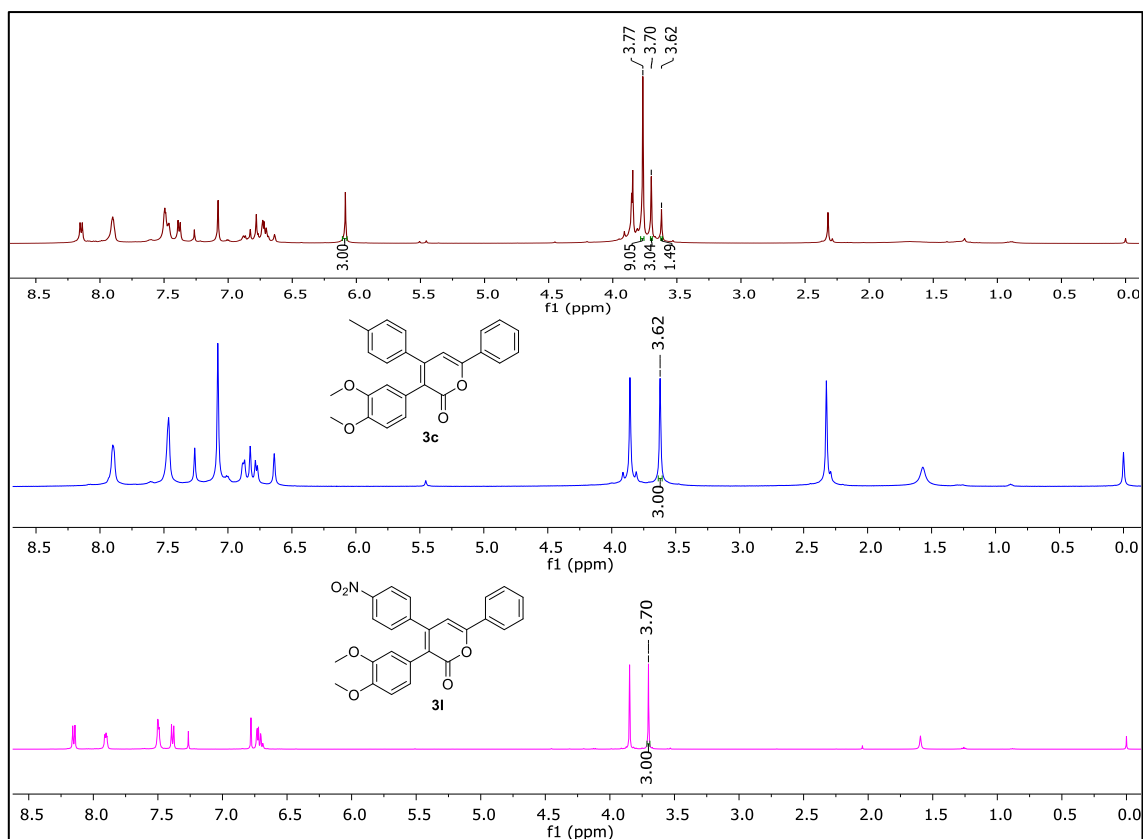

$^1\text{H}$  NMR overlay of competitive reaction,  $^1\text{H}$  NMR of **3c** and **3l** ( $\text{CDCl}_3$ , 500 MHz)

## 6.2. H/D Exchange Experiment

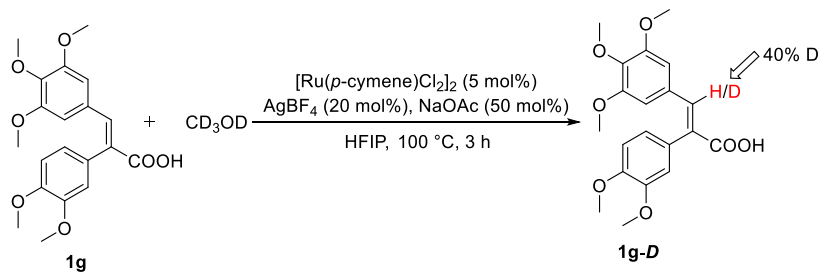

A pressure tube was charged with *cis*-stilbene acid (**1g**, 1 equiv.),  $[\text{Ru}(p\text{-cymene})\text{Cl}_2]_2$  (5 mol%),  $\text{AgBF}_4$  (20 mol%),  $\text{NaOAc}$  (50 mol%),  $\text{CD}_3\text{OD}$  (10 equiv.), and HFIP (1 mL). The reaction mixture was stirred at  $100\text{ }^\circ\text{C}$  for 3 h. The solvent was removed under reduced pressure and the residue was purified by silica gel chromatography using EA/hexane (40:60) to afford the deuterated compound, which was characterized by  $^1\text{H}$  NMR spectroscopy.  $^1\text{H}$  NMR analysis of **1g** revealed 40% deuteration at the olefinic-position of *cis*-stilbene acid.

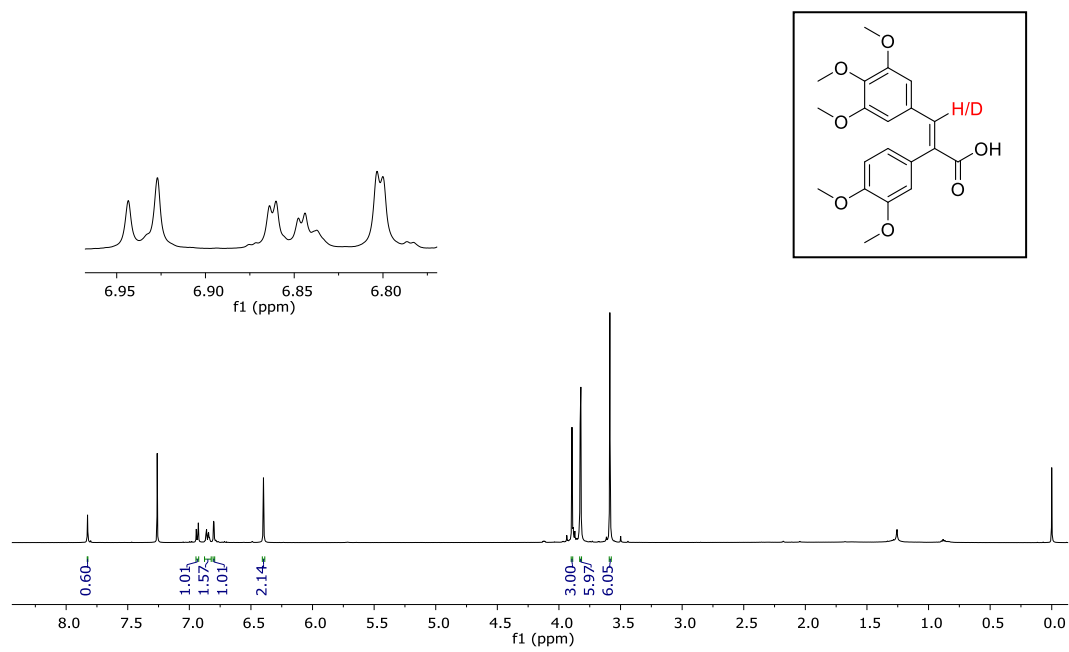

<sup>1</sup>H NMR of **1g-Din** in CDCl<sub>3</sub> (500MHz)

## 7. Mass studies

To identify the intermediate species involved the reaction was run under standard conditions. The reaction mixture was then analysed at specific time intervals.

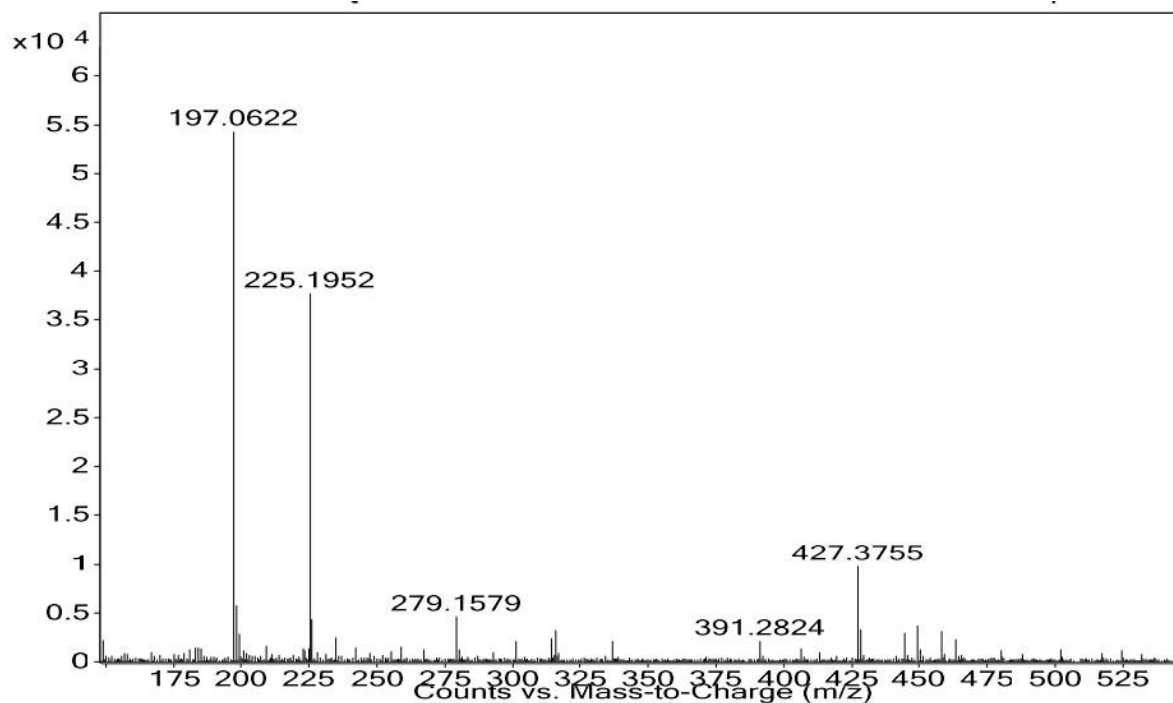

ESI-MS data of reaction mixture at 0 min.

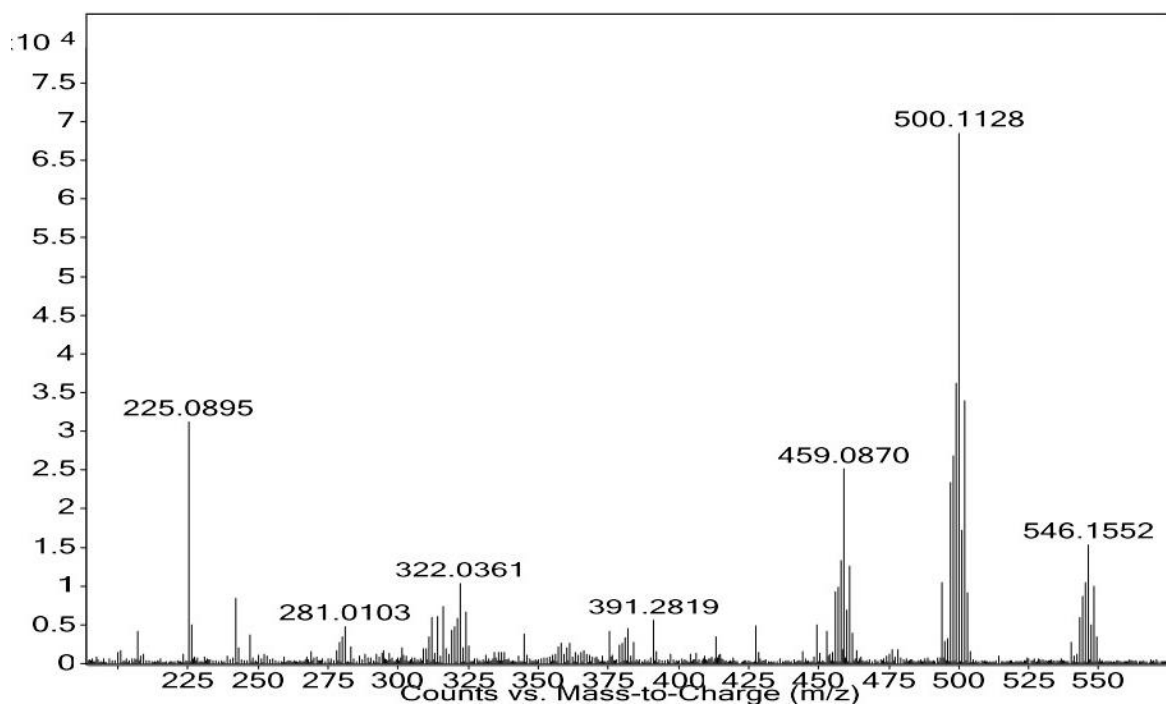

ESI-MS data of reaction mixture after 2 min.

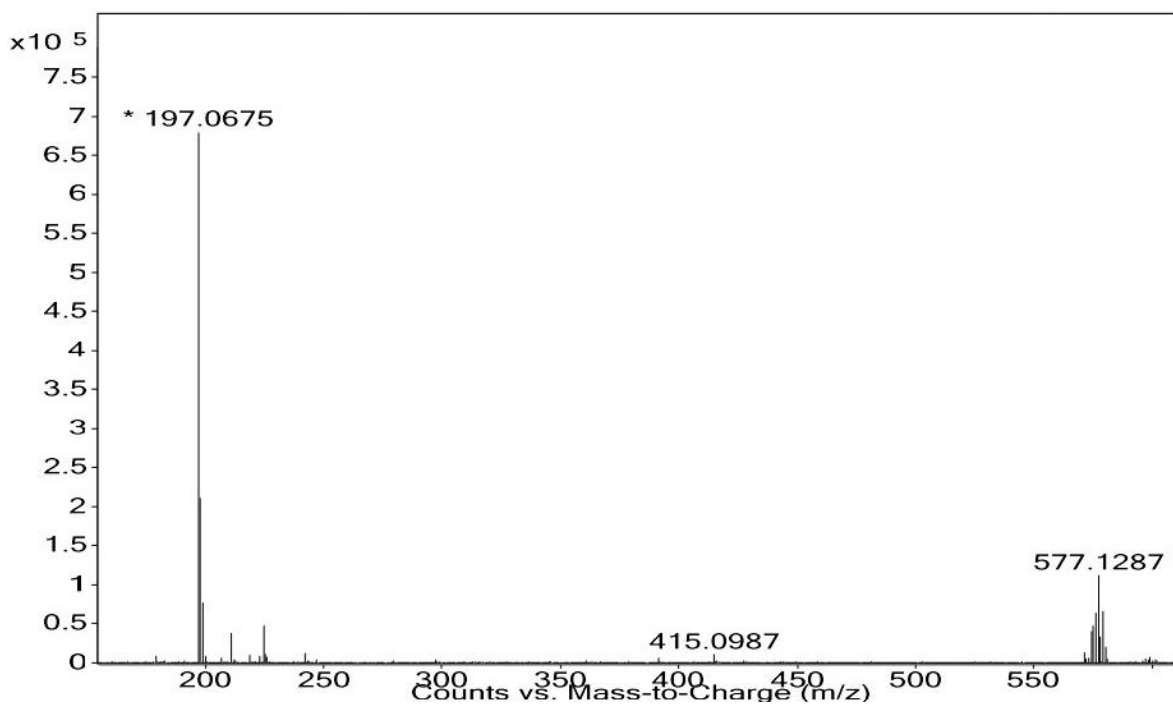

ESI-MS data of reaction mixture after 5 min.

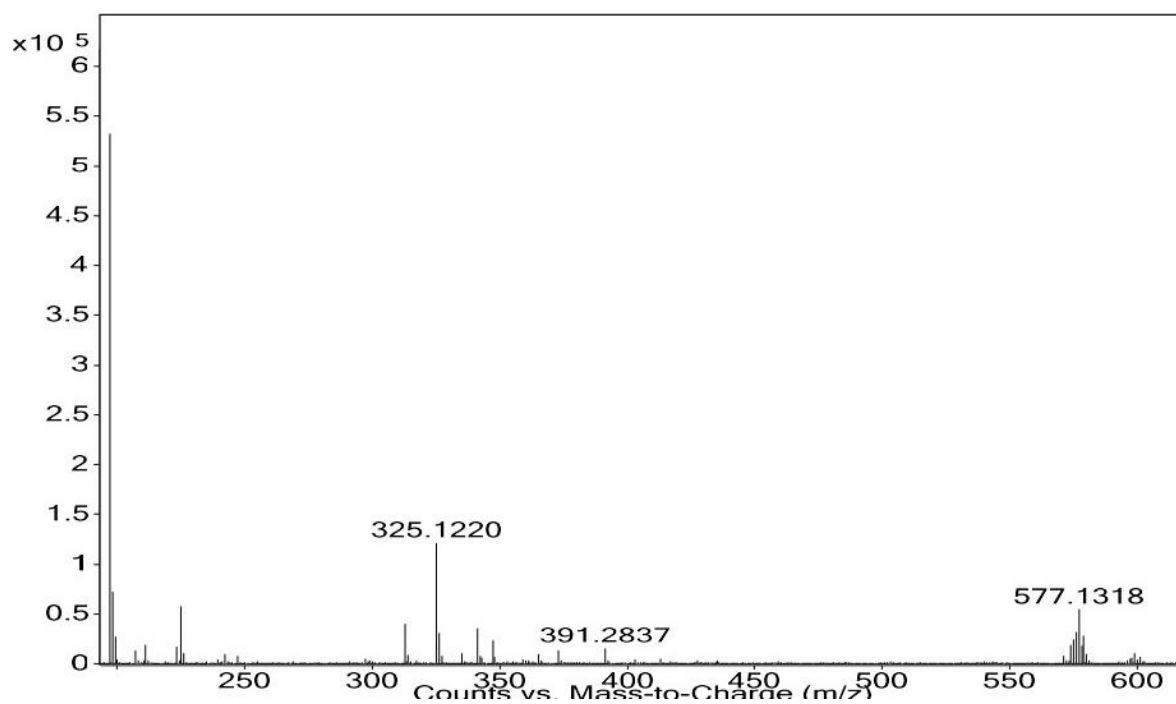

ESI-MS data of reaction mixture after 30 min.

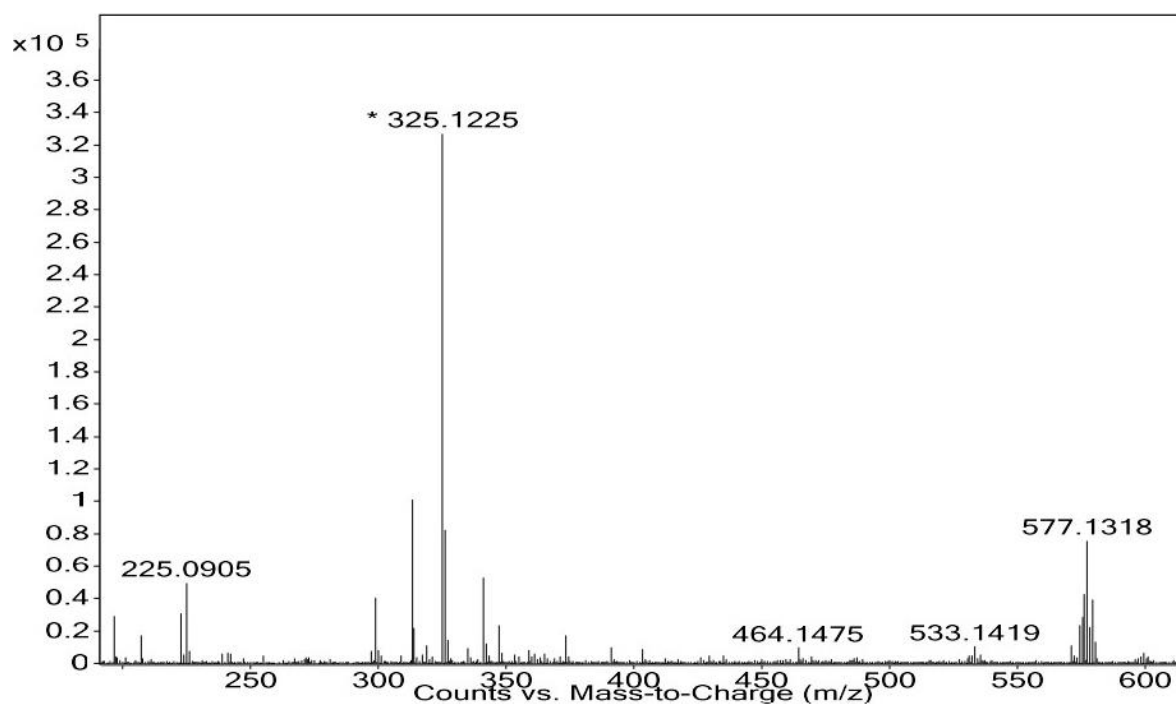

ESI-MS data of reaction mixture after 6 h.

## 8. Gram-Scale Preparation and Transformations

### 8.1. Gram-Scale Synthesis of **3i**

To demonstrate the scalability of the reaction, a gram-scale synthesis was performed using **1i** (1.0 g, 1.0 equiv.) and **2a** (1.2 equiv.) under the optimized conditions, as discussed in

the general procedure. The reaction proceeded efficiently to give the desired product **3i** (1.04 g) in 80% yield.

## 8.2. Synthesis of thione (**6**)

The synthetic transformation of the keto-group in the pyrone to thio-ketone was demonstrated by using **3i** (50 mg, 1.0 equiv.), Lawesson's reagent (2.0 equiv.) was refluxed in toluene for 12 h. After completion the solvent was evaporated under reduced pressure and extracted using ethyl acetate and water. The organic layer was then concentrated, dried over Na<sub>2</sub>SO<sub>4</sub> and subjected to column chromatography using ethyl acetate/ hexane (30:70) to obtain **6**.

*4-(3-Bromophenyl)-3-(3,4-dimethoxyphenyl)-6-phenyl-2H-pyran-2-thione* (**6**): 75% yield

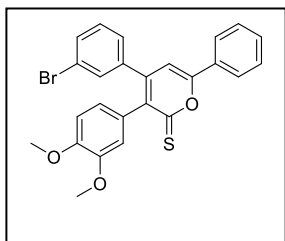

(54.4mg), yellow solid, mp: 190-193 °C, FT-IR (cm)<sup>-1</sup>: 2900, 2356, 1716, 1689, 1012; <sup>1</sup>H NMR (500 MHz, CDCl<sub>3</sub>): δ 7.99–7.95 (m, 2H), 7.52 (d, *J* = 6.6 Hz, 3H), 7.42–7.36 (m, 2H), 7.08 (t, *J* = 8.2 Hz, 1H), 7.03–6.96 (m, 2H), 6.81–6.72 (m, 3H), 6.70 (d, *J* = 1.9 Hz, 1H), 3.86 (s, 3H), 3.72 (s, 3H) ppm; <sup>13</sup>C NMR (125 MHz, CDCl<sub>3</sub>): δ 197.1, 163.7, 148.7, 148.6, 146.1, 139.9, 137.1, 131.7, 131.6, 131.1, 130.5, 129.8, 129.2, 128.6, 127.1, 125.9, 123.5, 122.4, 114.2, 110.8, 107.9, 55.9, 55.8 ppm; HRMS (ESI-QTOF): *m/z* [M+H]<sup>+</sup> calcd. for C<sub>25</sub>H<sub>20</sub>NO<sub>5</sub>S 479.0311 found 479.0269.

## 8.3. Gram-Scale Synthesis of **5a**

To demonstrate the scalability employing the hypervalent iodonium ylide, a gram-scale synthesis was performed using **1a** (1.0 g, 1.0 equiv.) and **4a** (1.2 equiv.) under the optimized conditions, as discussed in the general procedure. The reaction proceeded efficiently to give the desired product **5a** (1.11 g) in 79% yield.

## 9. Application

### 9.1. Photophysical study

The excitation and emission experiments were performed in a 3.0 mL quartz cuvette on Agilent Cary Eclipse fluorescence spectrophotometer (Singapore) at 20 °C. The excitation and emission slit widths were 10 nm each, while the scanning speed was 600 nm per minute with 10 millisecond integration time. The resulting data were plotted as fluorescence intensity versus wavelength plots. The fluorescence emission spectrum of compounds at 5 μM was recorded in

water. The excitation wavelength for compounds **3a**, **3c**, **3i**, **3l** and **3k** ranged from 344-390 nm whereas for compounds **5d**, **5e**, **5f** and **5g** ranged from 276-284. The emission spectrum was recorded between 290–600 nm for chromone-2-one series and 400-700nm for  $\alpha$ -pyrone series. All compounds were dissolved in DMSO to make the stock solution and then diluted in an aqueous medium for working solutions.

## 9.2. Molecular docking

The docking for the tubulin-binding potential was performed using the tubulin protein obtained from protein data bank (PDB ID: 4O2B). The receptor model was prepared using the protein preparation tool (Schrödinger 2017-1). The missing side chains and loops were added with removal of water molecules with a distance of more than 5 Å away from the active pocket. The receptor grid was generated with 20 Å distance equally in each direction X, Y and Z. The Ligprep model of Schrödinger suite was used to sketch the ligands (**3a-x**, **5a-m**) along with different conformer generation. The ligands were docked using GLIDE-XP 7.4 (Extra Precision) mode. The docking score obtained along with the co-crystal (colchicine-known tubulin inhibitor) is tabulated below (Table S3).

**Table S3.** Docking scores of the synthesized analogues along with colchicine

| $\alpha$ -pyrone series |               |           |               | Isochromene-one series |               |
|-------------------------|---------------|-----------|---------------|------------------------|---------------|
| Entry                   | Docking score | Entry     | Docking score | Entry                  | Docking score |
| <b>3a</b>               | -5.713        | <b>3n</b> | -7.333        | <b>5a</b>              | -5.251        |
| <b>3b</b>               | -6.570        | <b>3p</b> | -4.852        | <b>5b</b>              | -4.422        |
| <b>3c</b>               | -6.513        | <b>3q</b> | -4.876        | <b>5c</b>              | -6.767        |
| <b>3d</b>               | -5.388        | <b>3r</b> | -6.942        | <b>5d</b>              | -6.182        |
| <b>3f</b>               | -4.825        | <b>3s</b> | -5.319        | <b>5e</b>              | -5.833        |
| <b>3g</b>               | -4.639        | <b>3t</b> | -4.955        | <b>5f</b>              | -7.304        |
| <b>3h</b>               | -6.599        | <b>3v</b> | -6.819        | <b>5g</b>              | -6.771        |
| <b>3i</b>               | -6.628        | <b>3w</b> | -5.660        | <b>5h</b>              | -7.588        |
| <b>3j</b>               | -6.620        | <b>3x</b> | -5.896        | <b>5i</b>              | -6.037        |
| <b>3k</b>               | -6.601        |           |               | <b>5j</b>              | -4.768        |
| <b>3l</b>               | -6.546        |           |               | <b>5l</b>              | -5.591        |
| <b>3m</b>               | -6.540        |           |               | <b>5m</b>              | -4.865        |
| Colchicine              | <b>-6.395</b> |           |               |                        |               |

## 9.3. MTT Assay

MTT assay is a colorimetric assay based on the conversion of MTT (3-(4,5-dimethylthiazol-2-yl)-2,5-diphenyl tetrazolium bromide) into insoluble formazan by succinate

dehydrogenase enzyme (mitochondrial enzyme). The viability of cells is indicated by the ability of the live cells to reduce MTT level. The assay initiates with the seeding of cells in 96-well plates (density = 1000- 4000 cell/well) in 100  $\mu$ L of medium and grown for 24 h. The media was replaced with fresh media and cells were treated with 20  $\mu$ M concentration of compounds and standard for 48 h period. After 48 h of incubation media removal was followed by the addition of 100  $\mu$ L of MTT solution in media (0.5 mg/mL) and incubated for 4 h at 37  $^{\circ}$ C. The whole media was removed and 100  $\mu$ L of DMSO was added to dissolve formazan crystal and kept for 20 min at 37  $^{\circ}$ C. The amount of formazan was determined utilizing spectrophotometric microtiter plate reader at 570 nm wavelength.

**Table S4.** Percentage inhibition on cancer cell lines (HCT-116 and A549) at 20  $\mu$ M after 48 h

| Compound          | Cell lines |       | Compound  | Cell lines   |              |
|-------------------|------------|-------|-----------|--------------|--------------|
|                   | HCT-116    | A549  |           | HCT-116      | A549         |
| <b>3a</b>         | 30.99      | 29.01 | <b>3s</b> | 73.15        | 70.17        |
| <b>3b</b>         | 45.31      | 35.88 | <b>3t</b> | 22.10        | 20.14        |
| <b>3c</b>         | 41.56      | 39.76 | <b>3v</b> | 71.74        | 55.95        |
| <b>3d</b>         | 30.18      | 12.90 | <b>3w</b> | 86.33        | 77.00        |
| <b>3f</b>         | 55.09      | 45.54 | <b>3x</b> | <b>89.36</b> | <b>82.94</b> |
| <b>3g</b>         | 70.89      | 61.11 | <b>5a</b> | 26.11        | 30.92        |
| <b>3h</b>         | 79.09      | 30.15 | <b>5b</b> | 45.16        | 49.76        |
| <b>3i</b>         | 56.76      | 50.72 | <b>5c</b> | 60.41        | 61.23        |
| <b>3j</b>         | 68.45      | 52.34 | <b>5d</b> | 30.56        | 41.15        |
| <b>3k</b>         | 75.34      | 69.10 | <b>5e</b> | 66.42        | 63.17        |
| <b>3l</b>         | 46.94      | 33.18 | <b>5f</b> | 77.80        | 71.45        |
| <b>3m</b>         | 30.90      | 21.38 | <b>5g</b> | 56.38        | 45.67        |
| <b>3n</b>         | 71.77      | 66.63 | <b>5h</b> | 73.15        | 65.15        |
| <b>3p</b>         | 56.09      | 47.19 | <b>5i</b> | 46.77        | 68.66        |
| <b>3q</b>         | 81.18      | 77.16 | <b>5j</b> | 36.73        | 52.14        |
| <b>3r</b>         | 30.21      | 11.18 | <b>5l</b> | 49.49        | 69.58        |
| <b>Colchicine</b> | 85.22      | 90.10 | <b>5m</b> | 59.56        | 71.77        |

\*HCT-116: human colon cancer cell line, A549: human lung cancer cell

## 10. References

1. C. Jadala, M. Sathish, T. S. Reddy, V. G. Reddy, R. Tokala, S. K. Bhargava, N. Shankaraiah, N. Nagesh, A. Kamal, Synthesis and in vitro cytotoxicity evaluation of  $\beta$ -carboline-combretastatin carboxamides as apoptosis inducing agents: DNA intercalation and topoisomerase-II inhibition, *Bioorg. Med. Chem.* **2019**, 27, 3285-3298.
2. S. Kumar, S. Nunewar, and V. Kanchupalli, Rh(III)-Catalyzed Cross-Coupling/Annulation of Two Carbene Precursors: Construction of Dihydrobenzo[c]chromen-6-one Scaffolds and Application in the Total Synthesis of Cannabinol. *Asian. J. Org. Chem.* 2022, 11, e202100689. doi: [10.1002/ajoc.202100689](https://doi.org/10.1002/ajoc.202100689).

3. H. Keisuke, M. Satoshi, K. Mitsuo, Unusual Fluorescent Properties of Novel Fluorophores, 6-Aryl-3,4-diphenyl- $\alpha$ -pyrone Derivatives, *Bull. Chem. Soc. Jpn.*, **2001**, *74*, 1567-1575.



## 11. Spectral Data

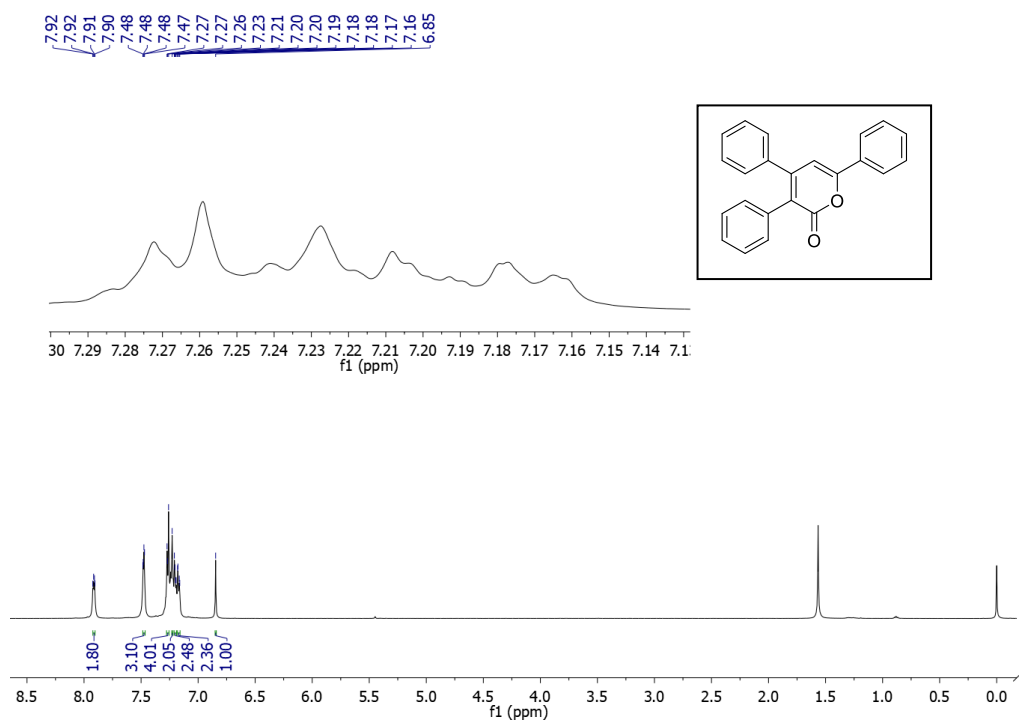

<sup>1</sup>H NMR (500 MHz, CDCl<sub>3</sub>) of compound **3a<sup>3</sup>**

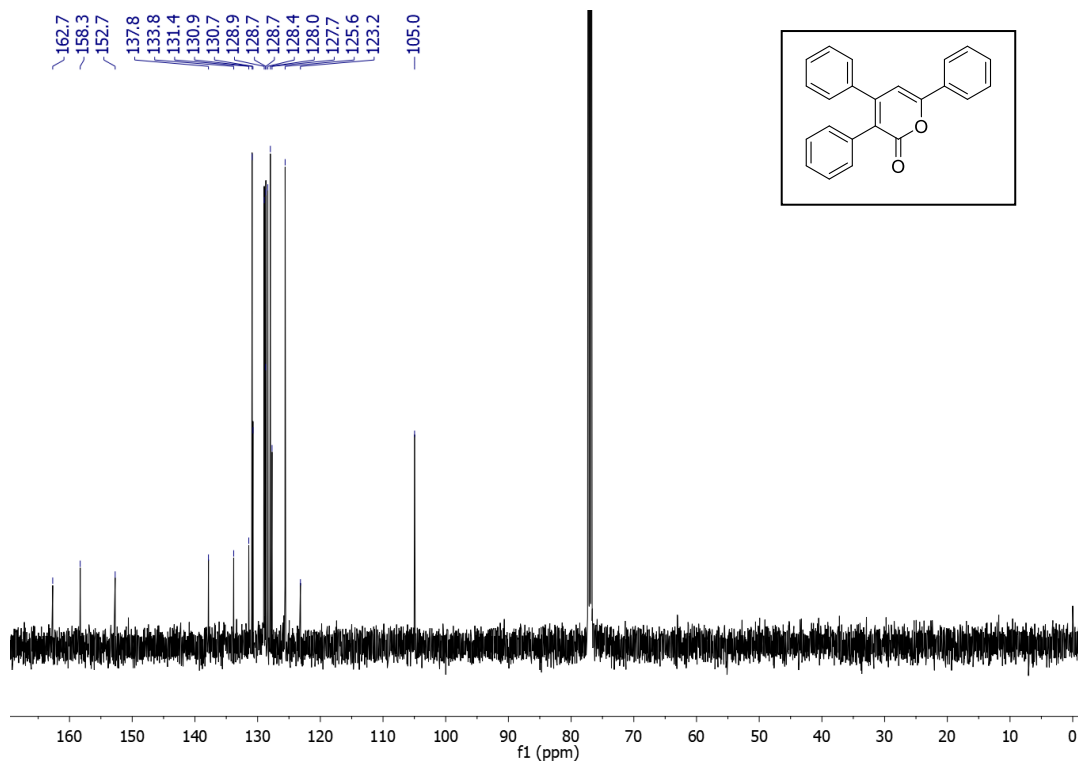

<sup>13</sup>C NMR (125 MHz, CDCl<sub>3</sub>) of compound **3a<sup>3</sup>**

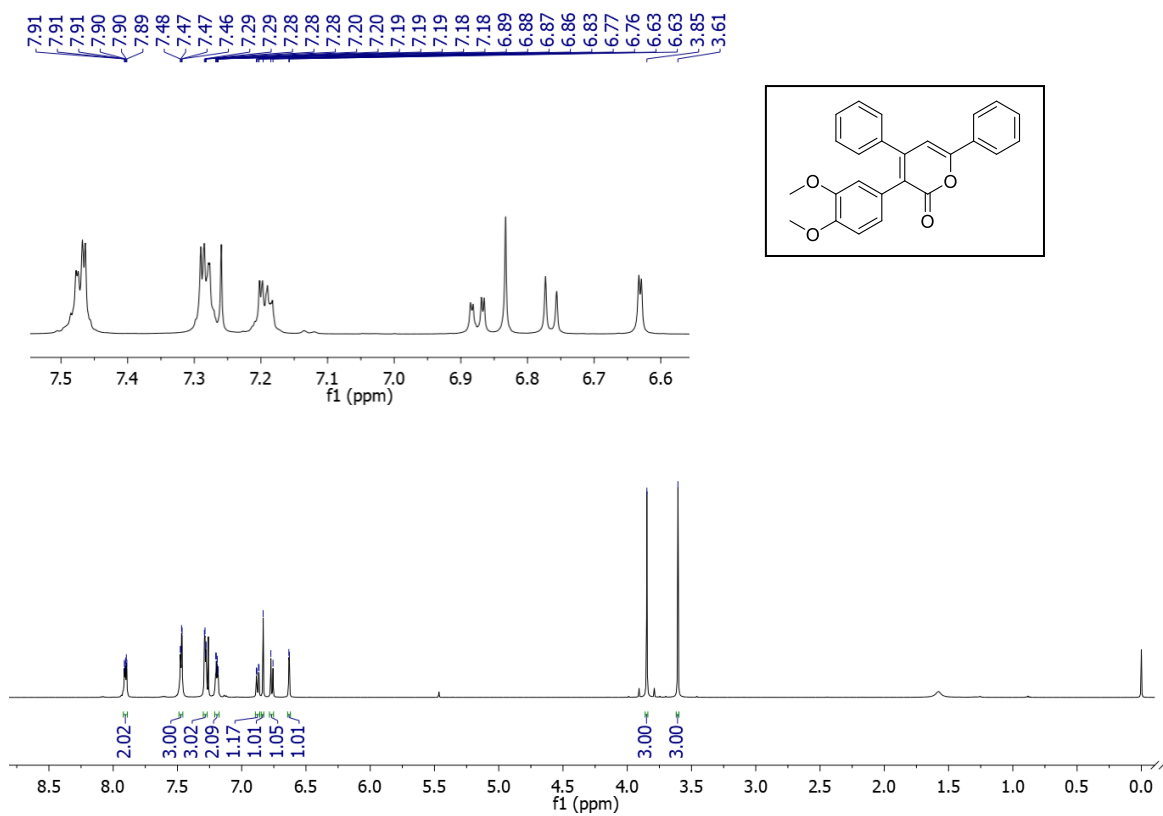

<sup>1</sup>H NMR (500 MHz, CDCl<sub>3</sub>) of compound **3b**

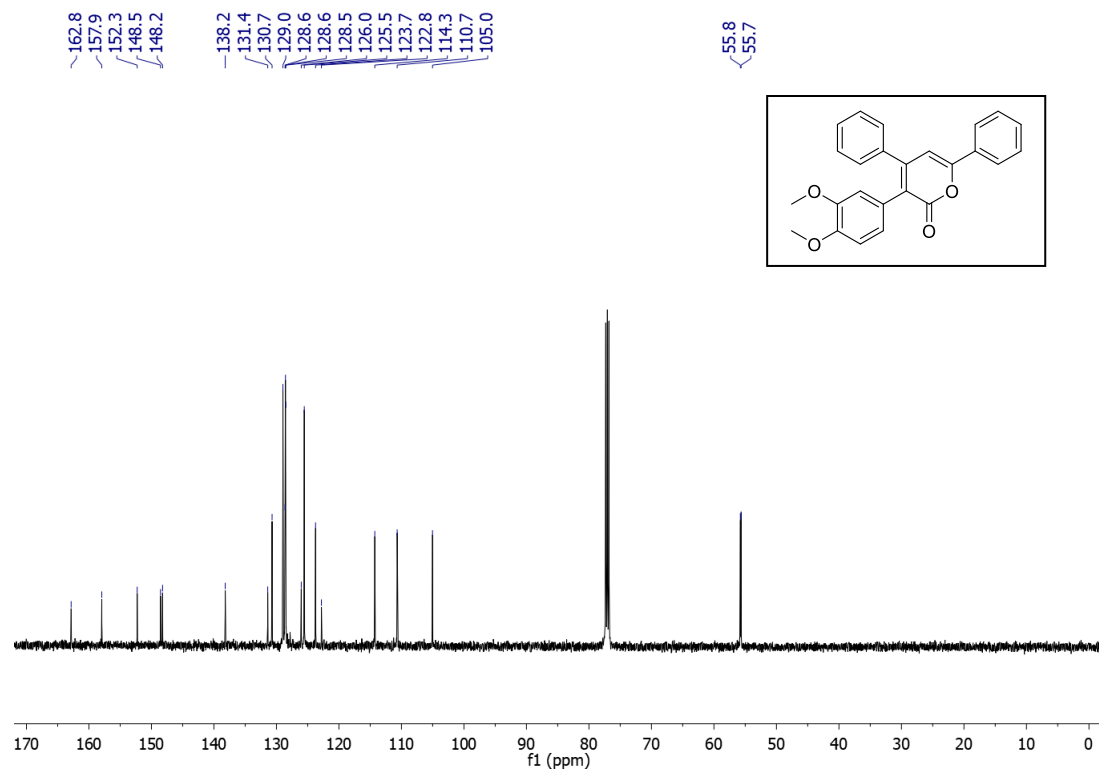

<sup>13</sup>C NMR (125 MHz, CDCl<sub>3</sub>) of compound **3b**

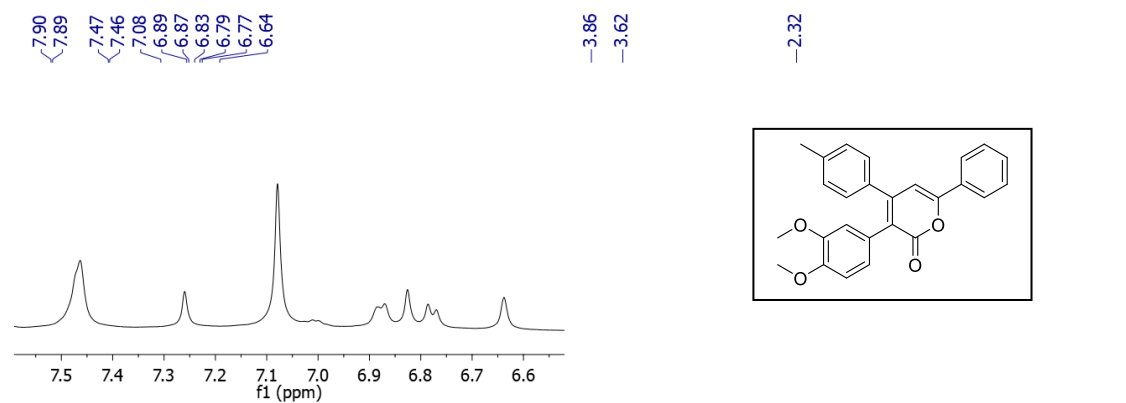

<sup>1</sup>H NMR (500 MHz, CDCl<sub>3</sub>) of compound **3c**

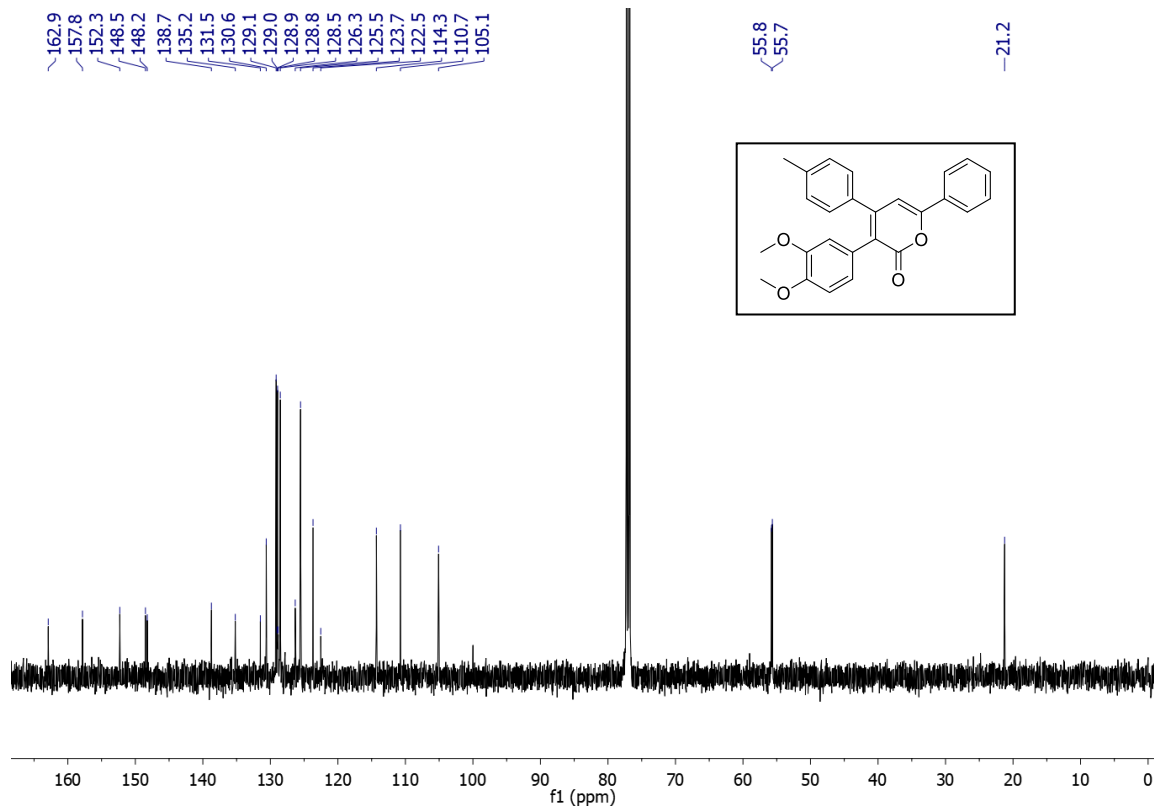

<sup>13</sup>C NMR (125 MHz, CDCl<sub>3</sub>) of compound **3c**

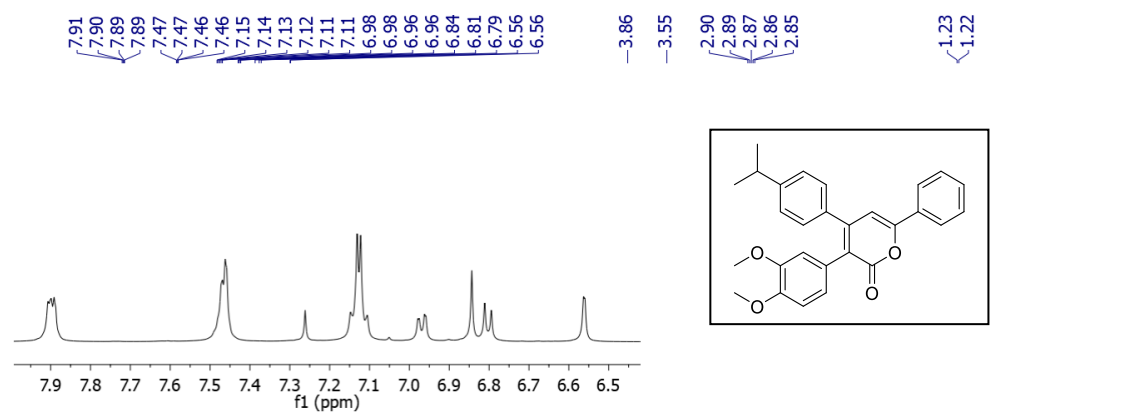

<sup>1</sup>H NMR (500 MHz, CDCl<sub>3</sub>) of compound **3d**

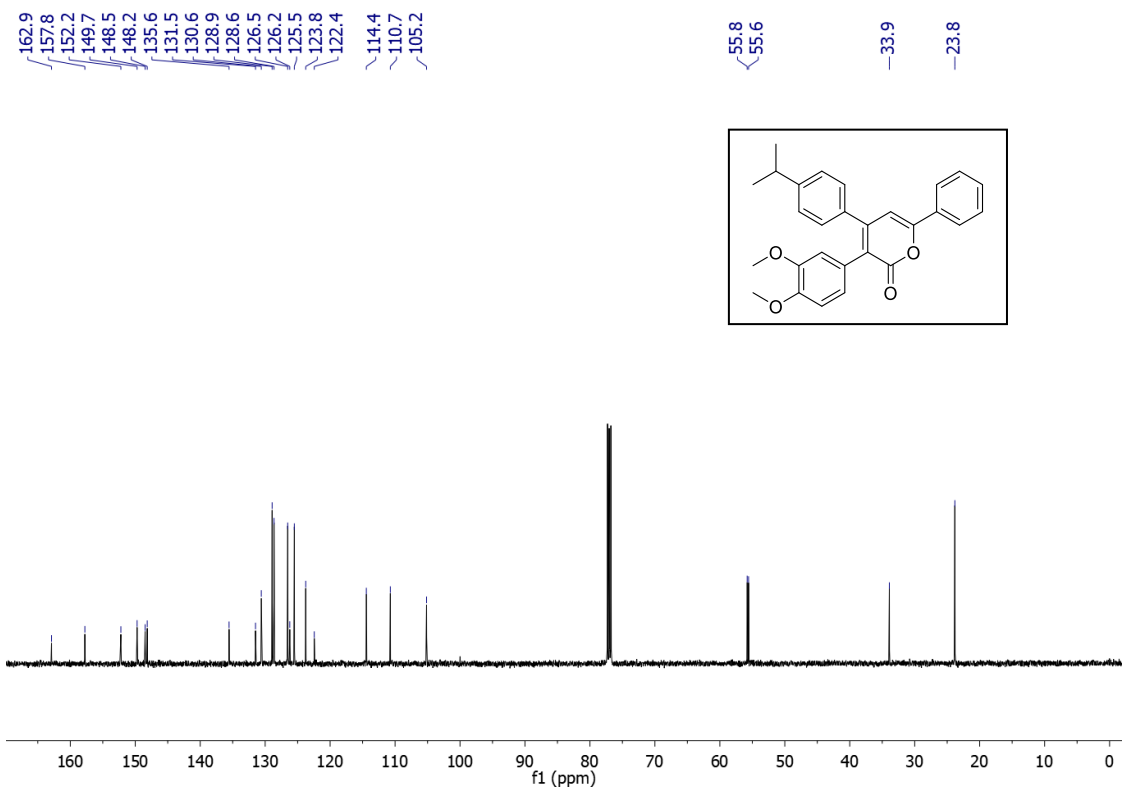

<sup>13</sup>C NMR (125 MHz, CDCl<sub>3</sub>) of compound **3d**

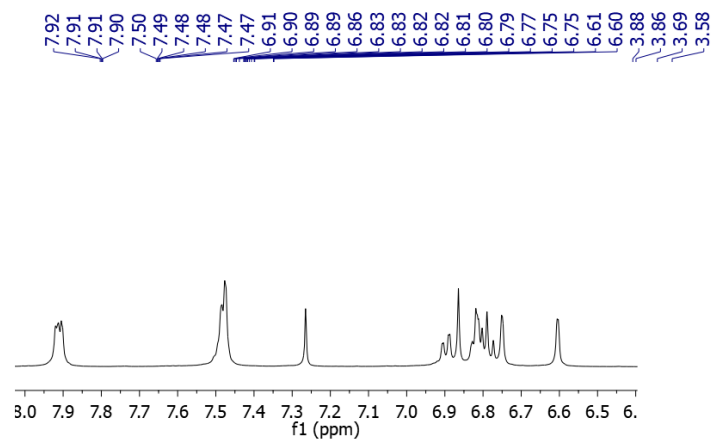

<sup>1</sup>H NMR (500 MHz, CDCl<sub>3</sub>) of compound **3f**

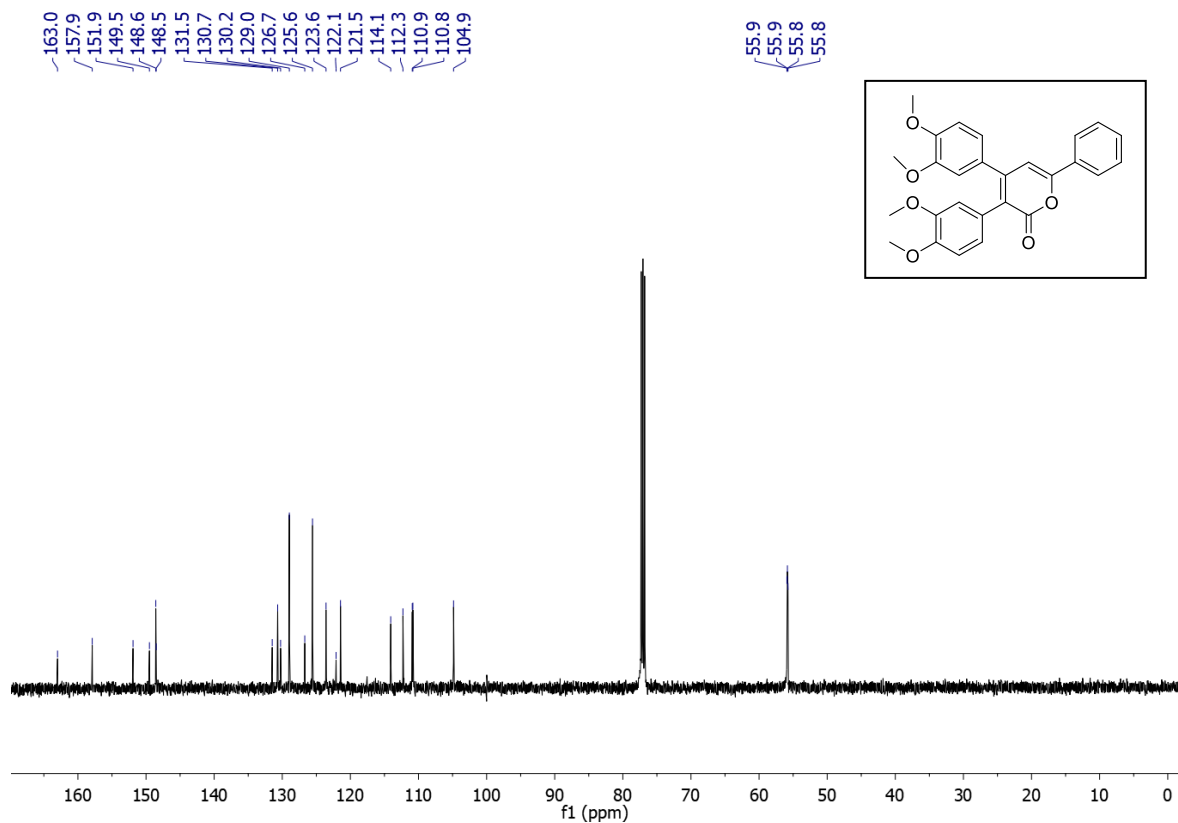

<sup>13</sup>C NMR (125 MHz, CDCl<sub>3</sub>) of compound **3f**

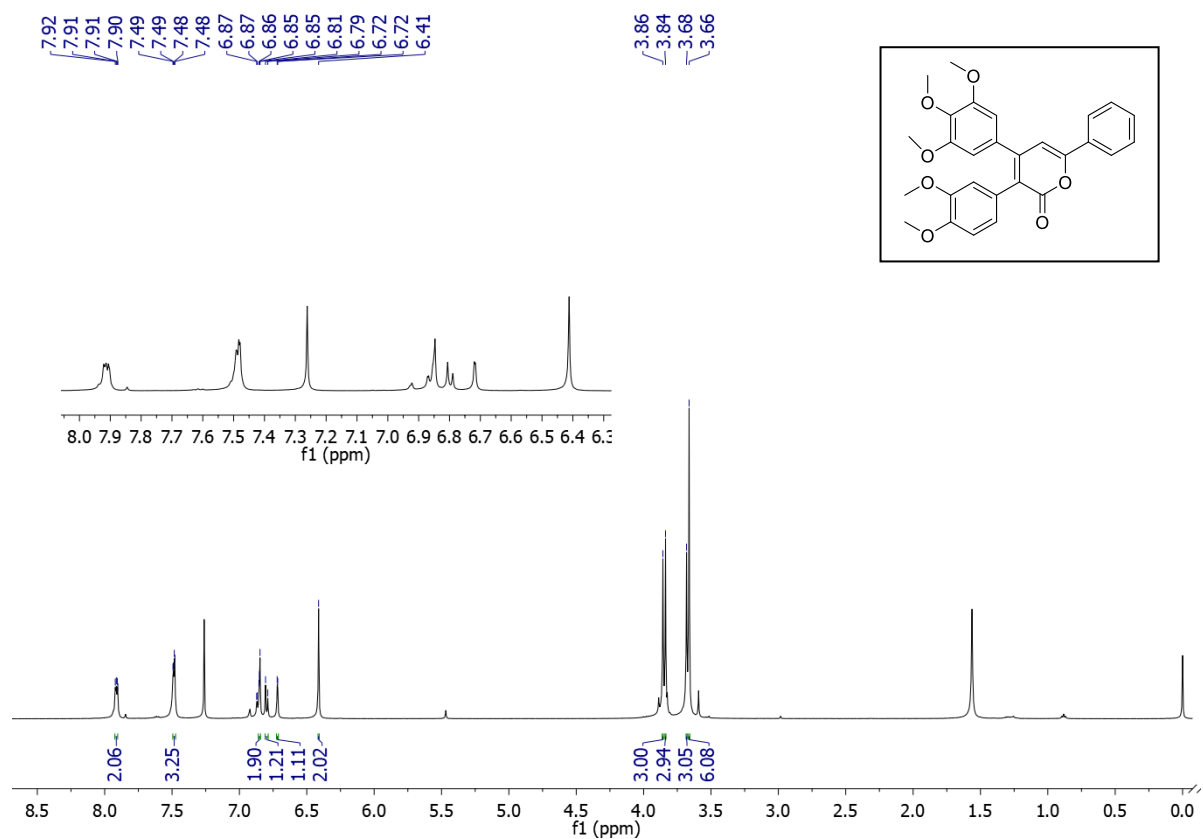

<sup>1</sup>H NMR (500 MHz, CDCl<sub>3</sub>) of compound **3g**

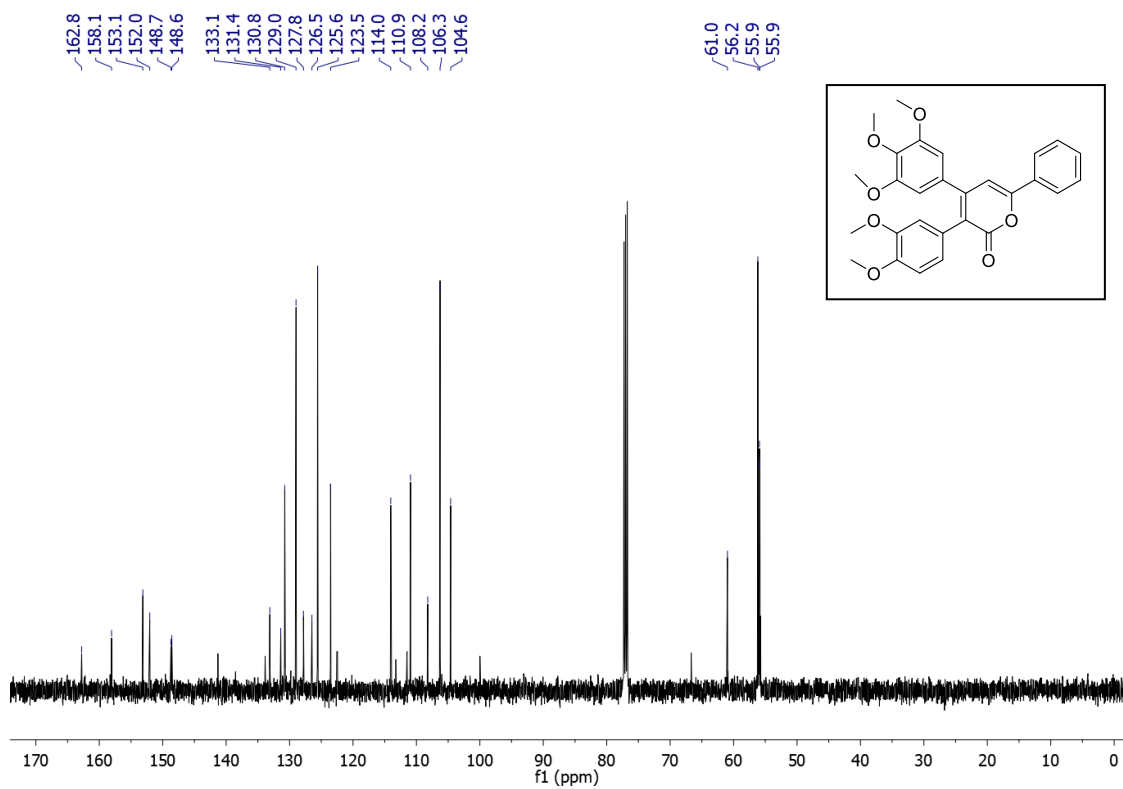

<sup>13</sup>C NMR (125 MHz, CDCl<sub>3</sub>) of compound **3g**

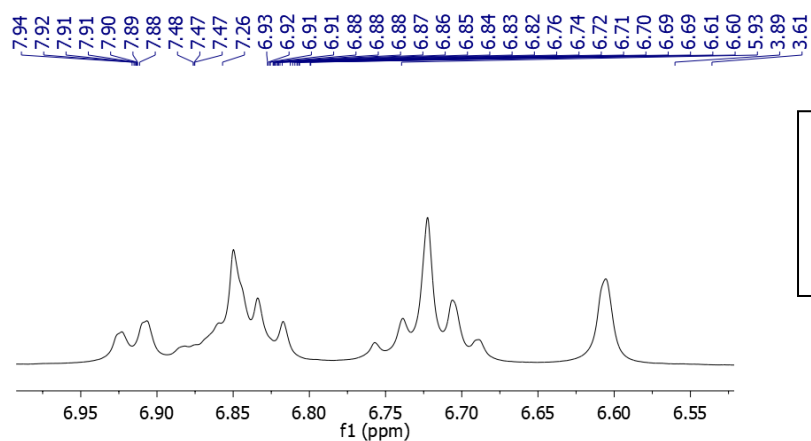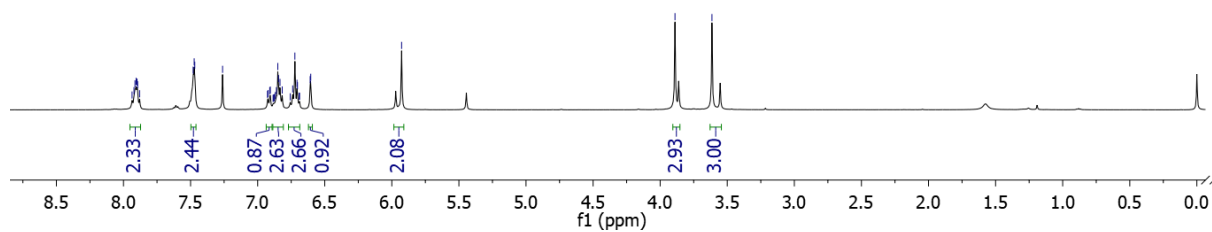

<sup>1</sup>H NMR (500 MHz, CDCl<sub>3</sub>) of compound **3h**

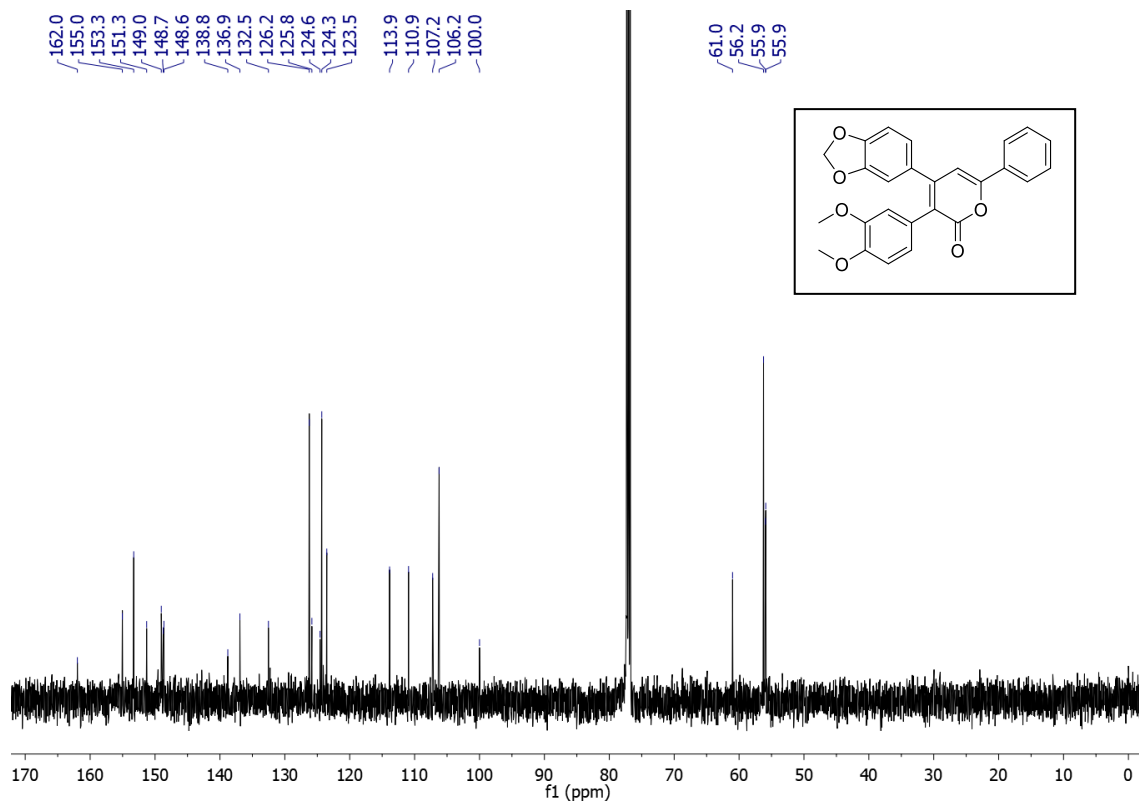

<sup>13</sup>C NMR (125 MHz, CDCl<sub>3</sub>) of compound **3h**

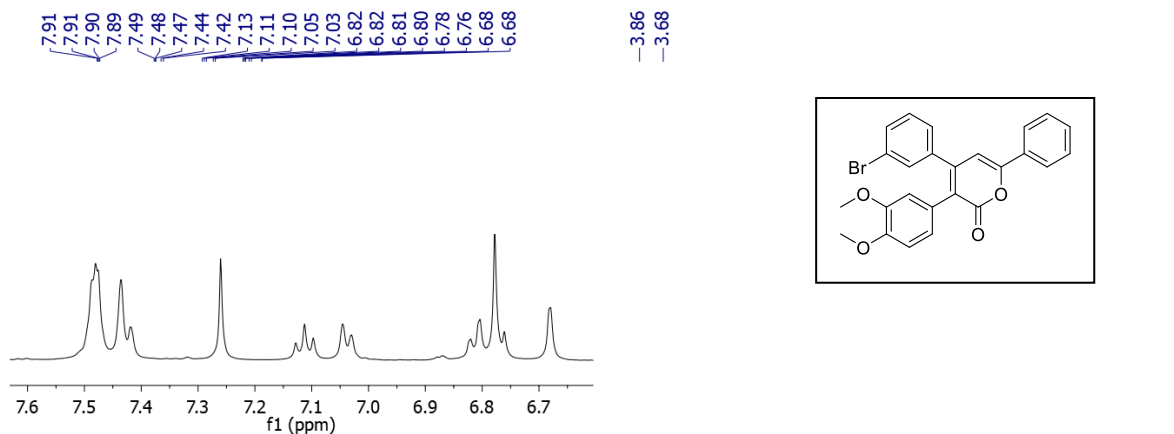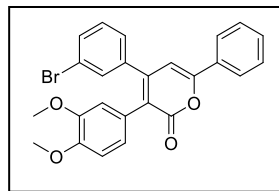

<sup>1</sup>H NMR (500 MHz, CDCl<sub>3</sub>) of compound **3i**

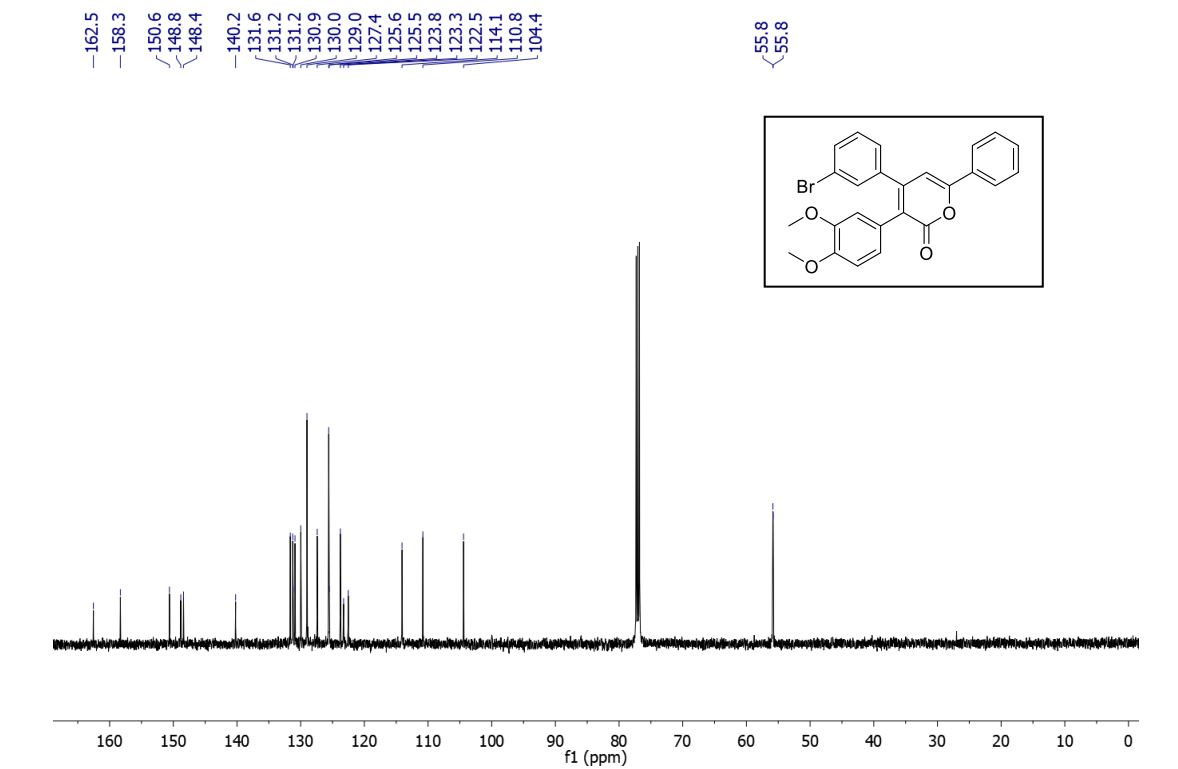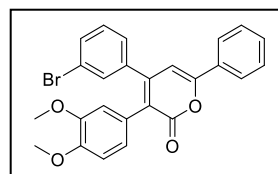

<sup>13</sup>C NMR (125 MHz, CDCl<sub>3</sub>) of compound **3i**



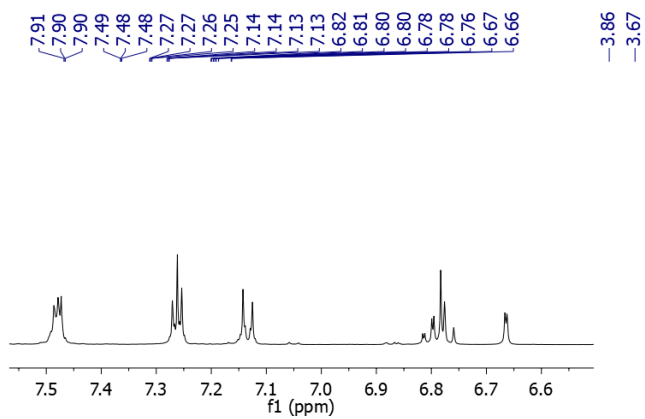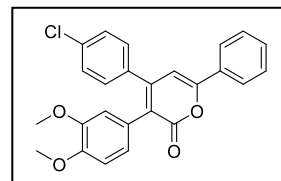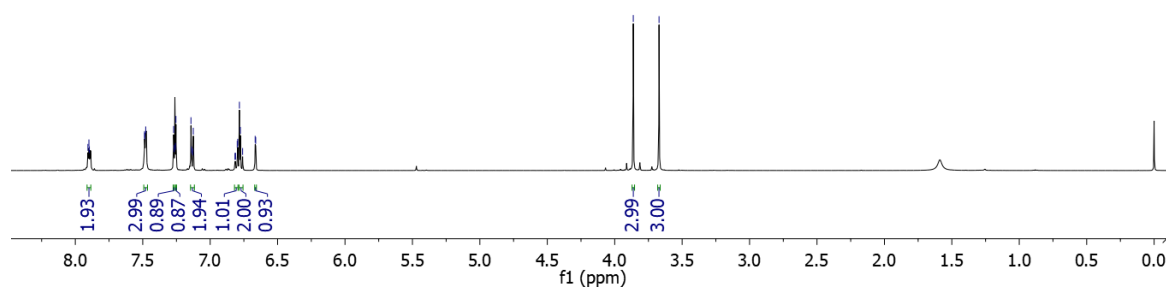

$^1\text{H}$  NMR (500 MHz,  $\text{CDCl}_3$ ) of compound **3j**

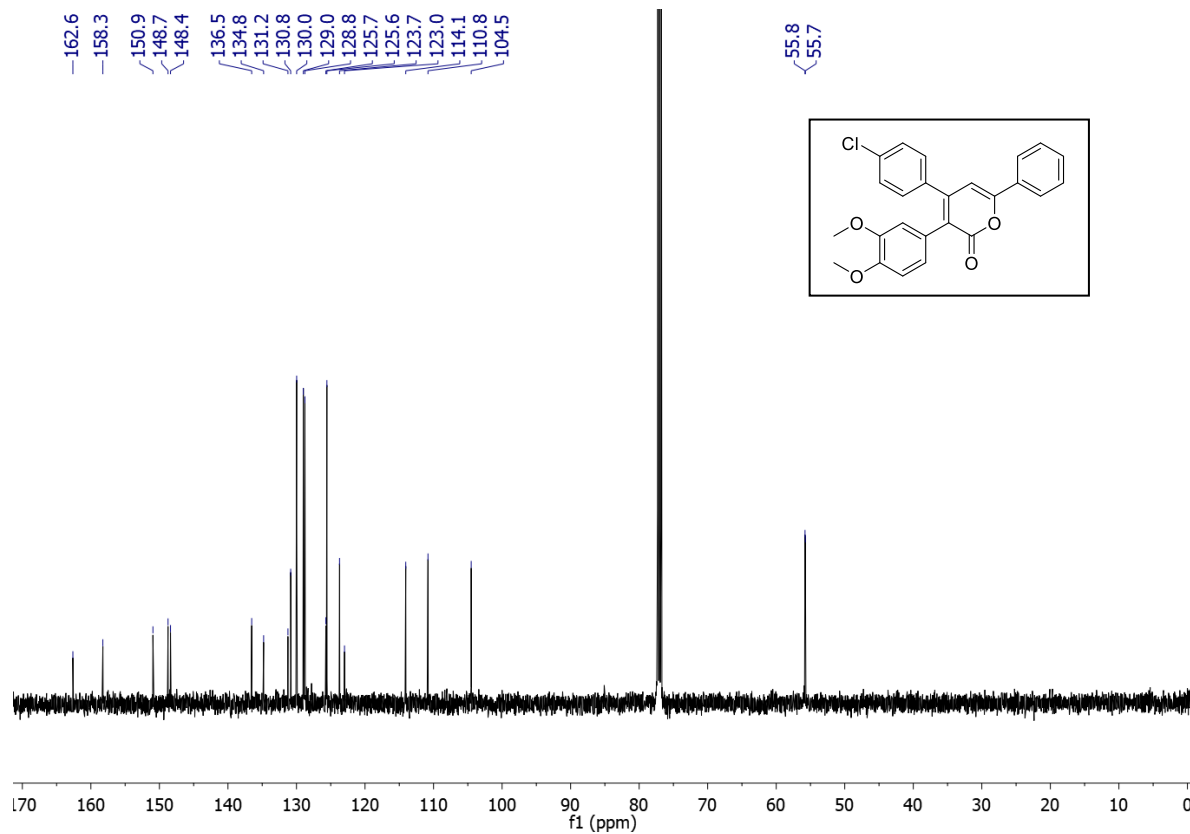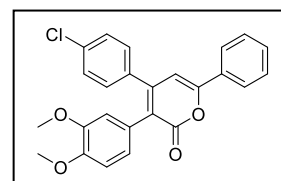

$^{13}\text{C}$  NMR (125 MHz,  $\text{CDCl}_3$ ) of compound **3j**

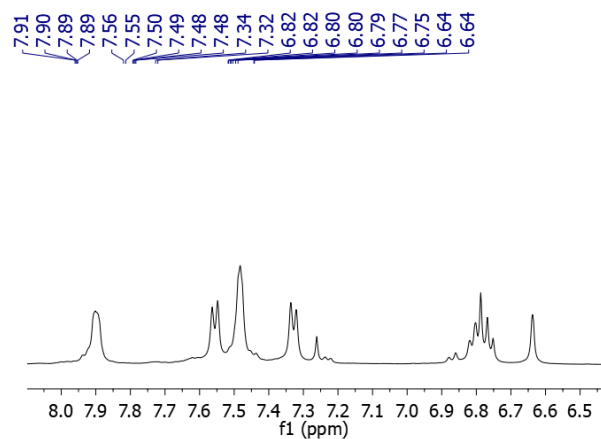

3.85  
3.63

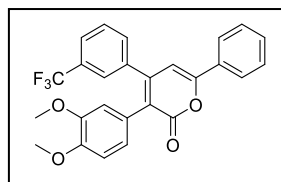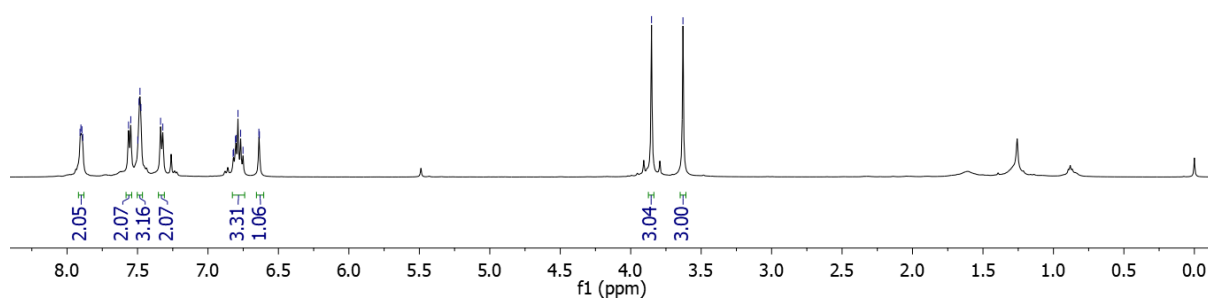

<sup>1</sup>H NMR (500 MHz, CDCl<sub>3</sub>) of compound **3k**

162.4  
158.5  
150.6  
148.9  
148.4  
141.9  
131.1  
131.0  
129.0  
129.0  
125.6  
125.5  
125.5  
125.5  
125.4  
125.3  
123.8  
123.5  
114.1  
110.8  
104.3

55.8  
55.7

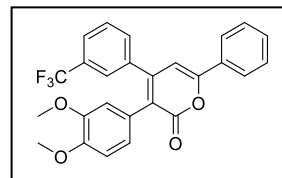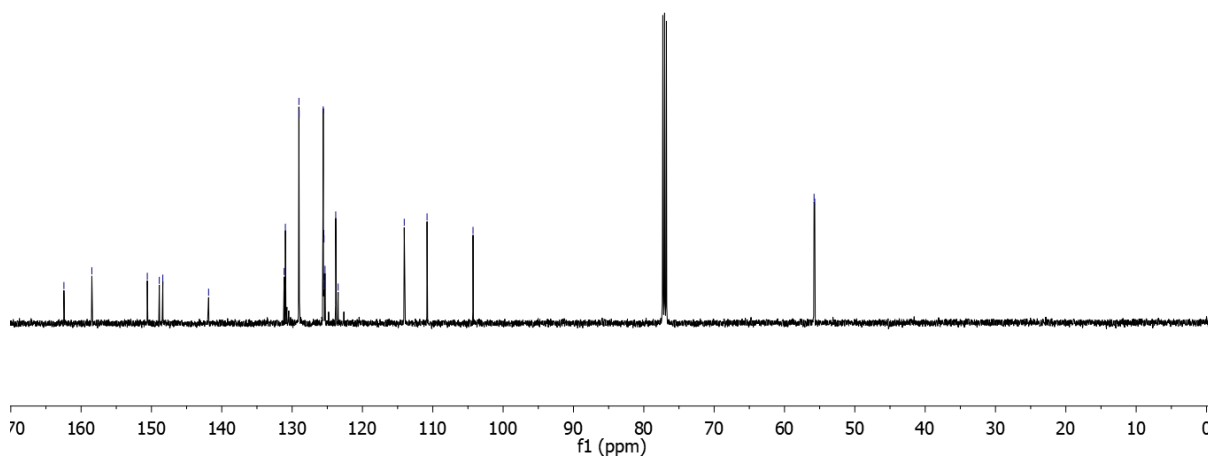

<sup>13</sup>C NMR (125 MHz, CDCl<sub>3</sub>) of compound **3k**

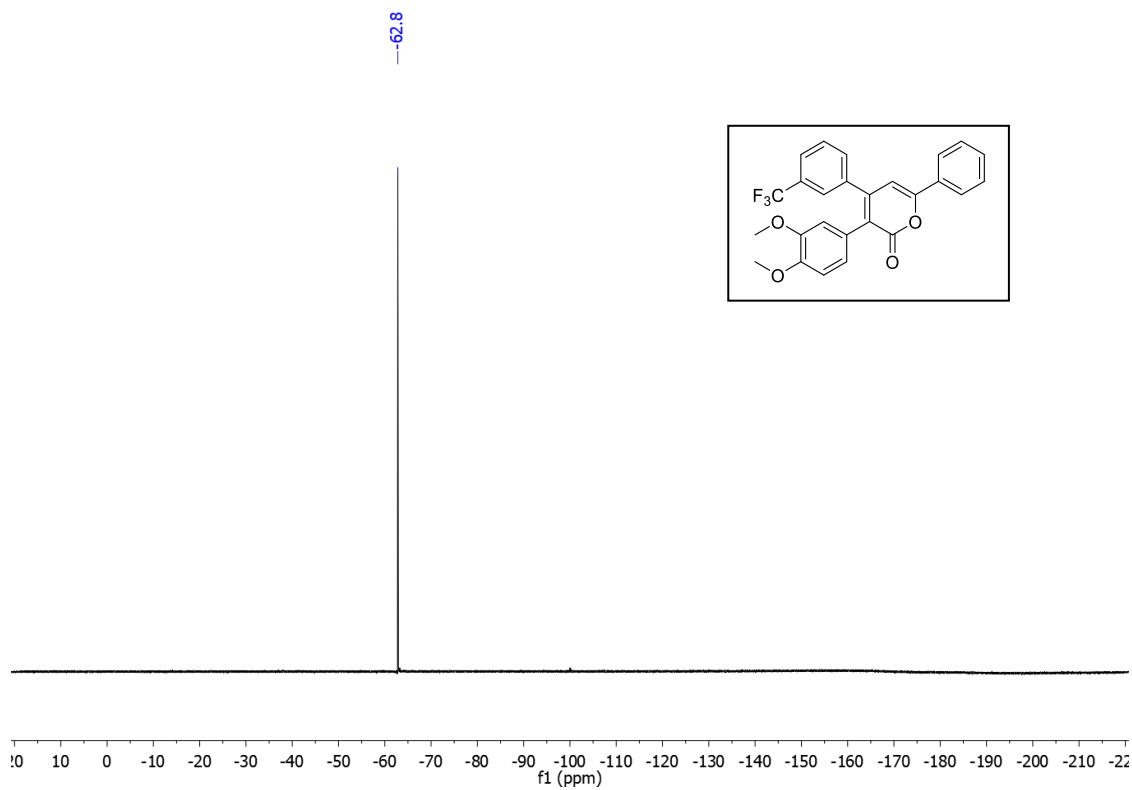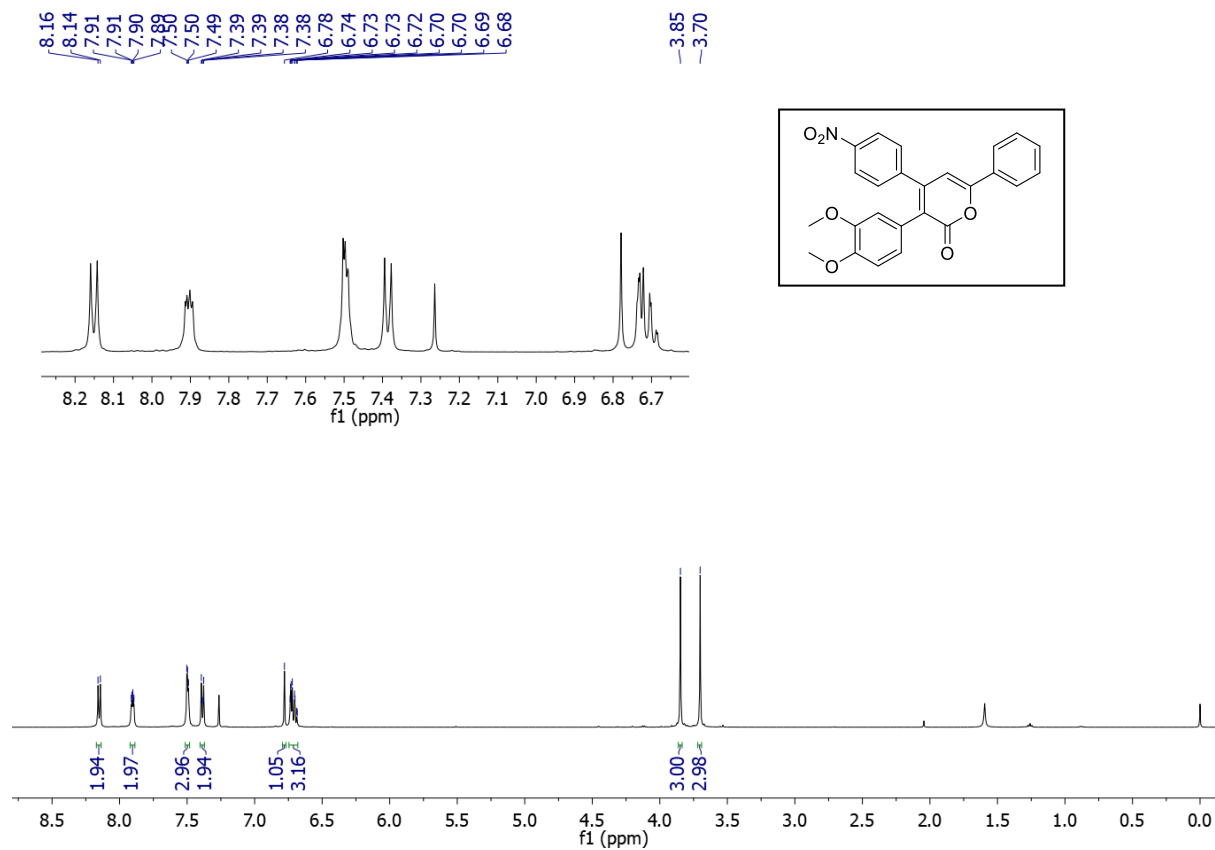

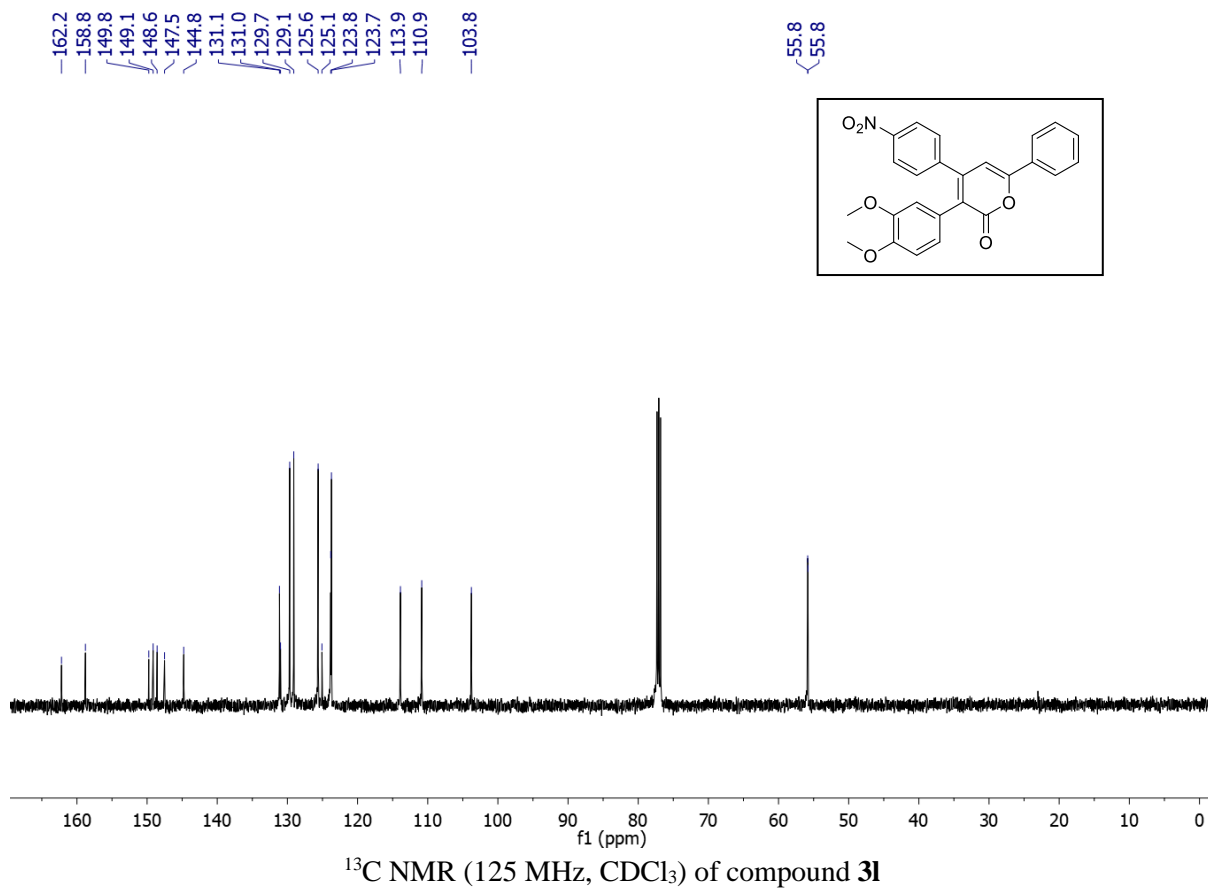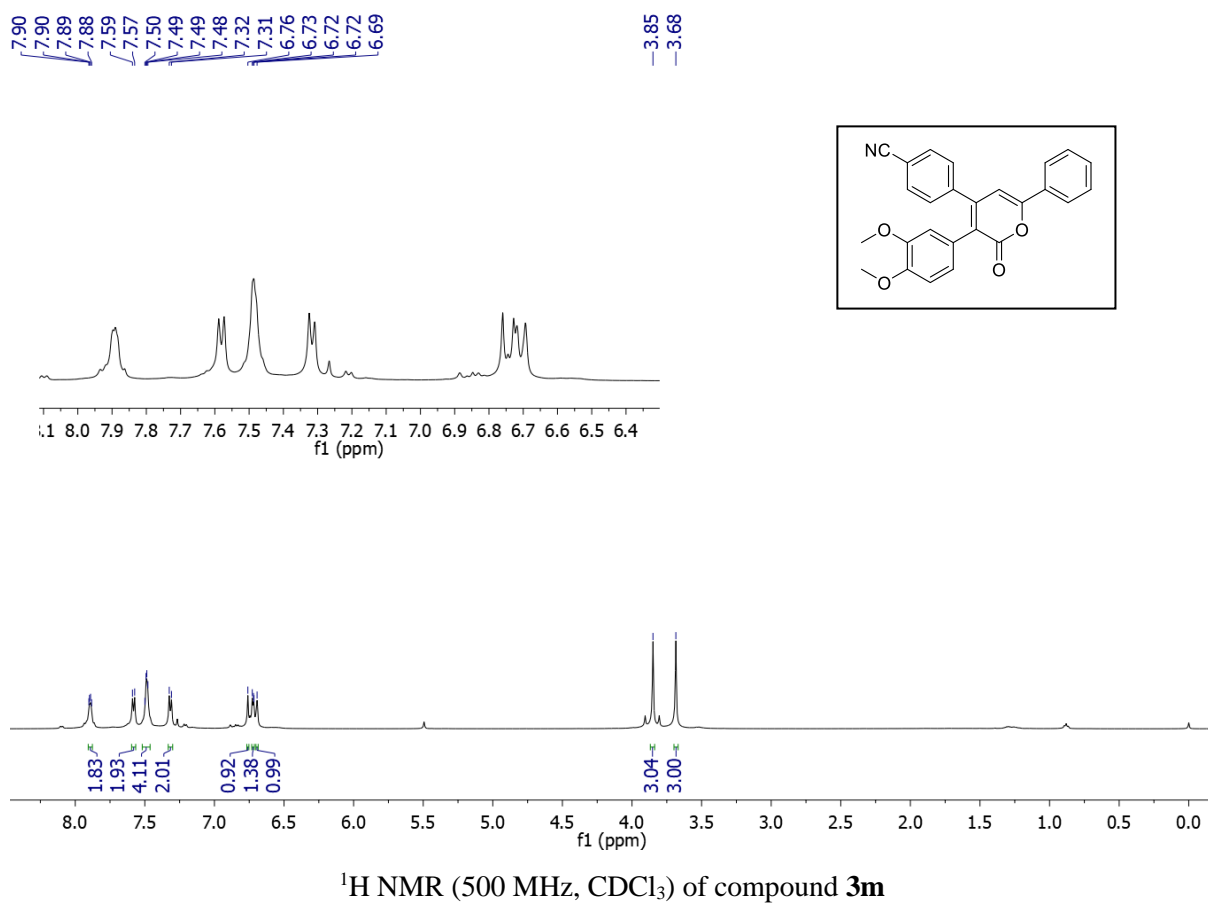

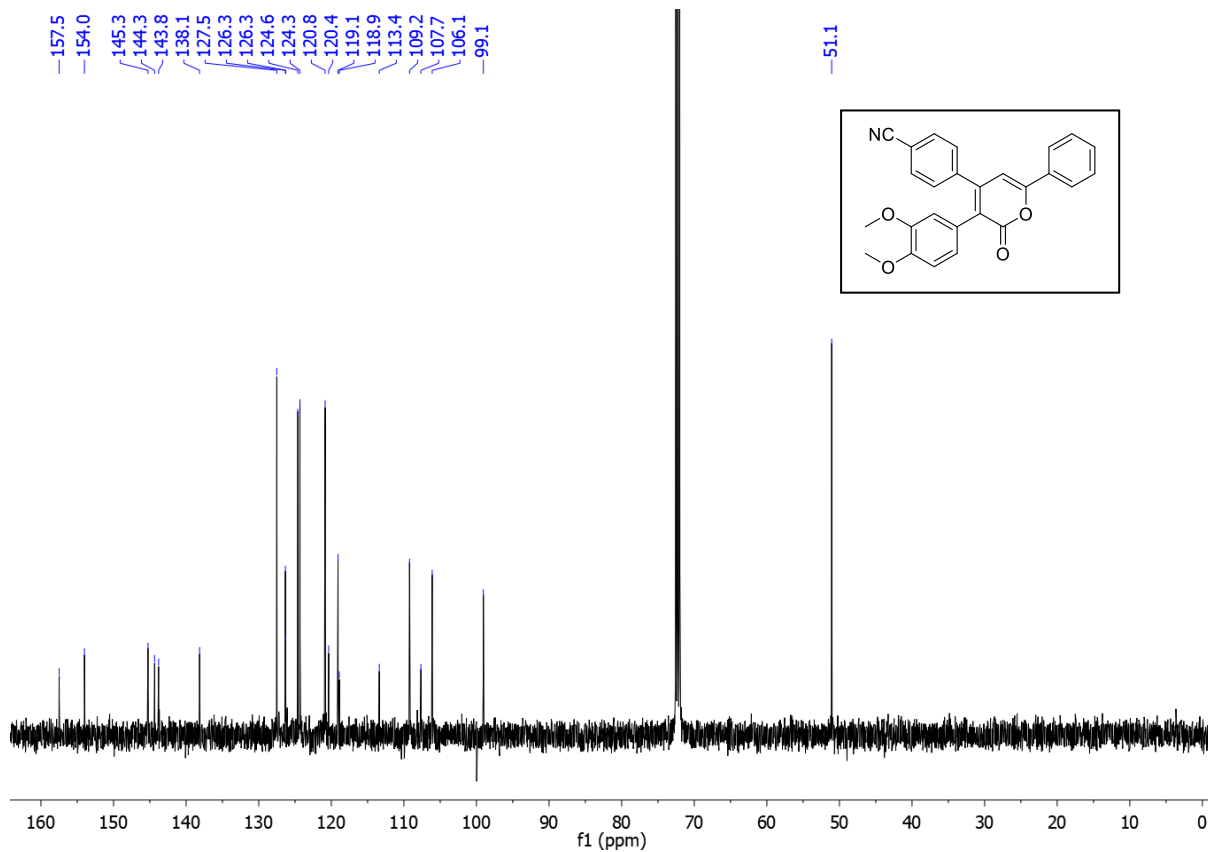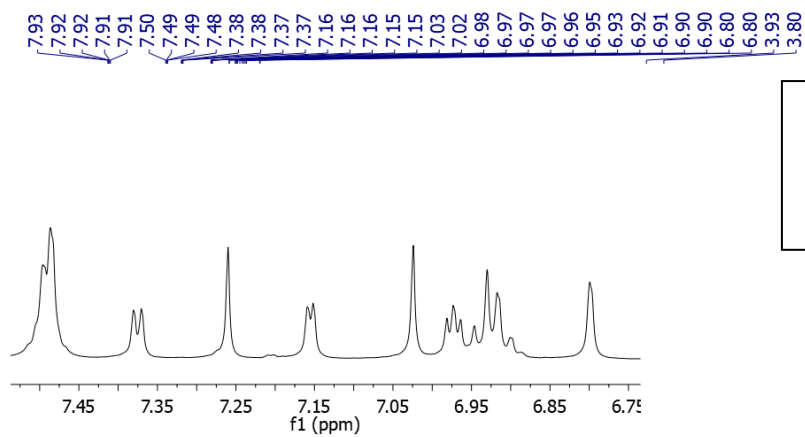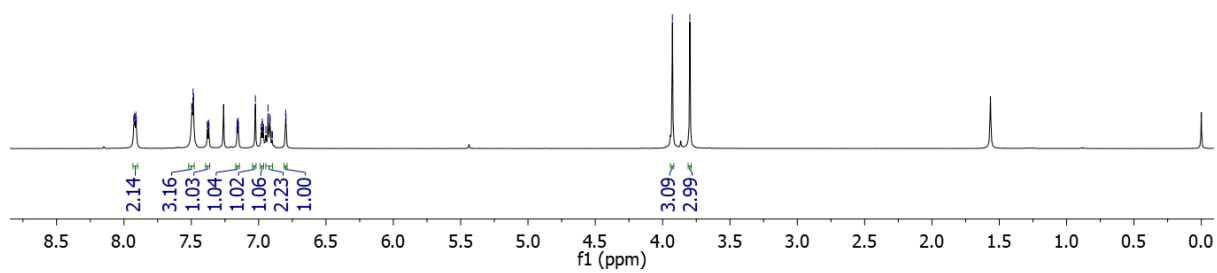

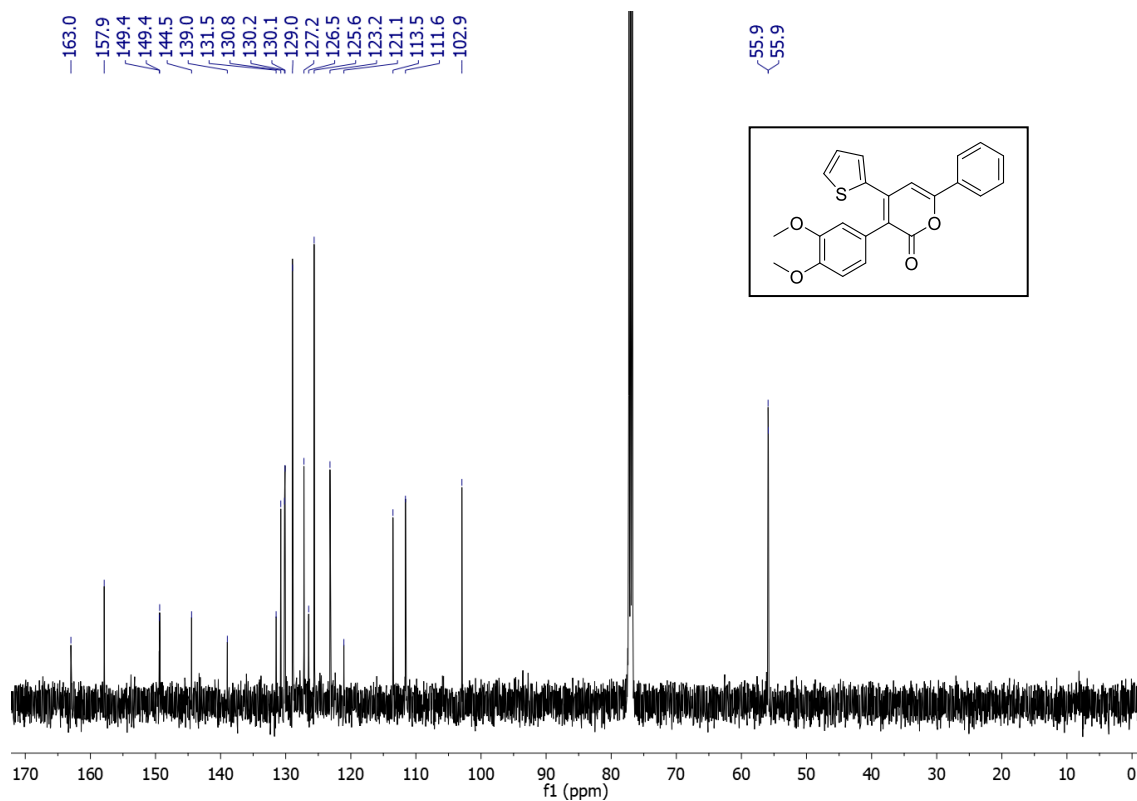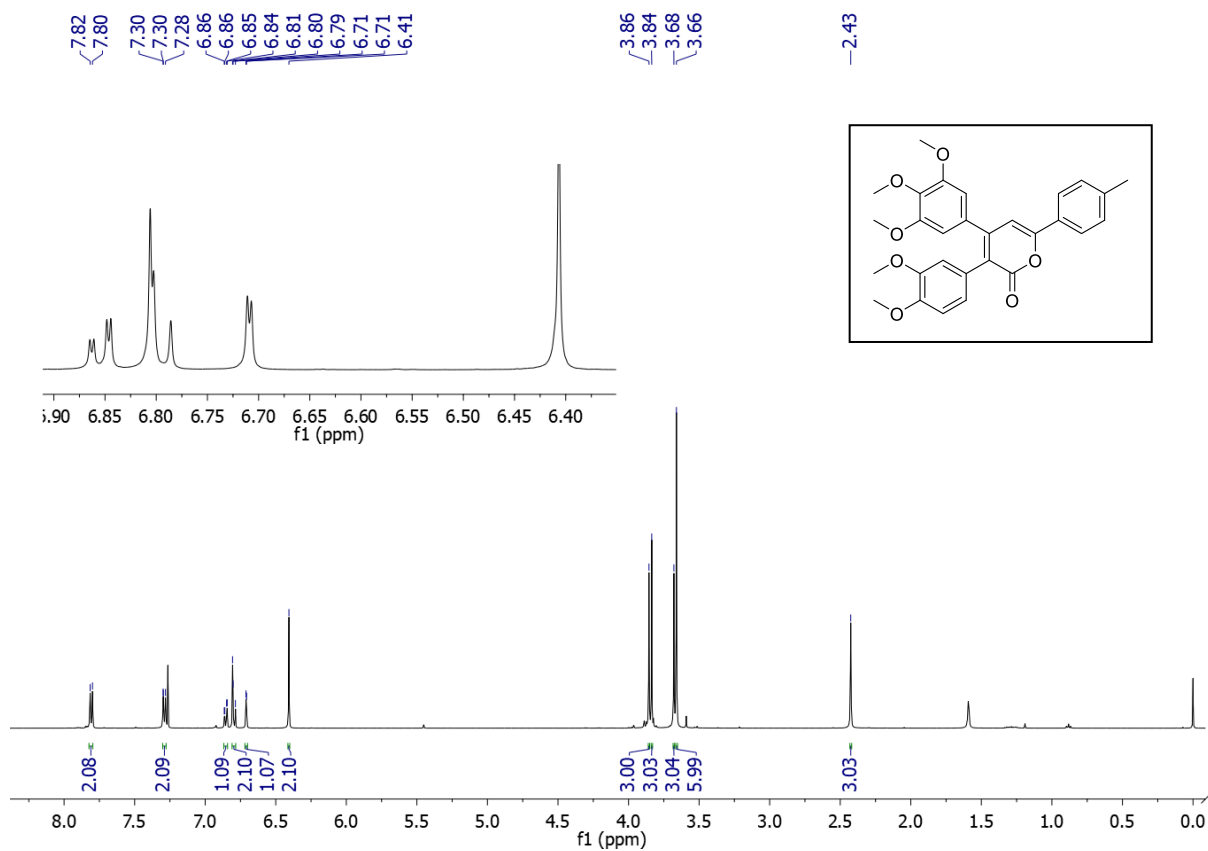

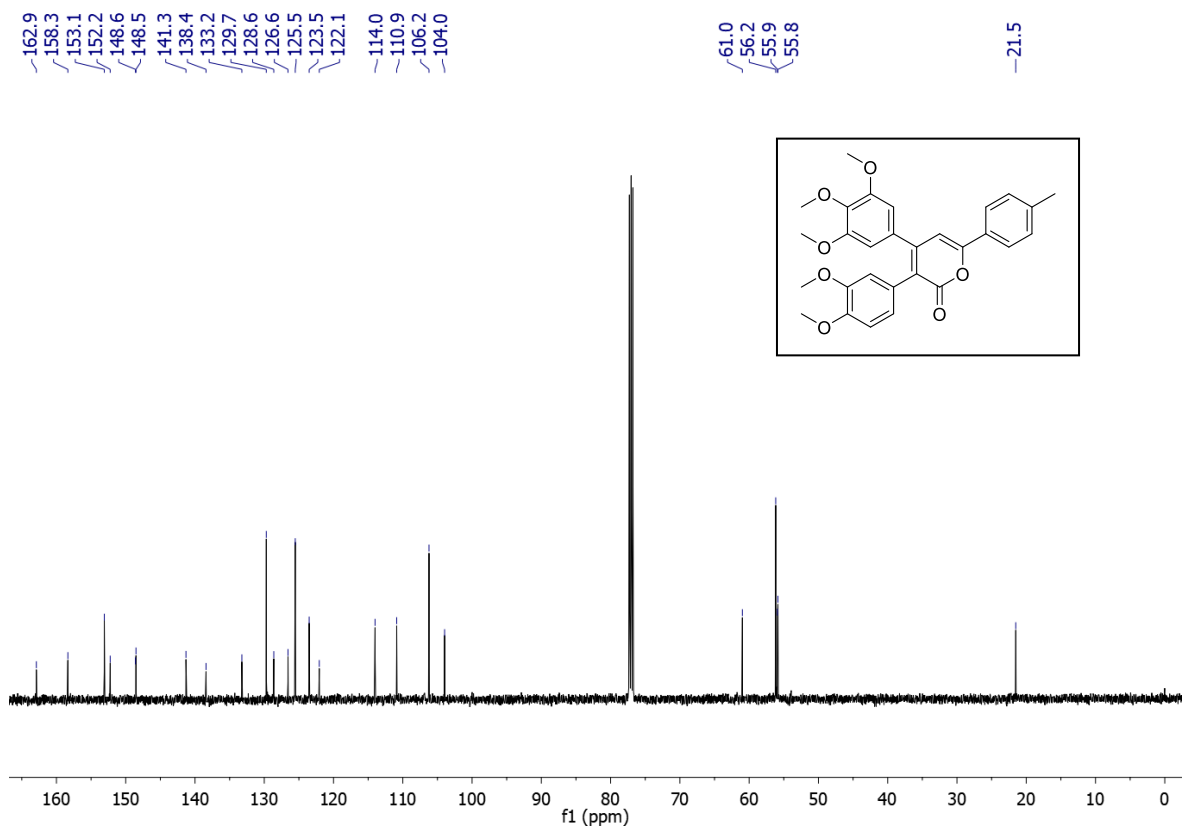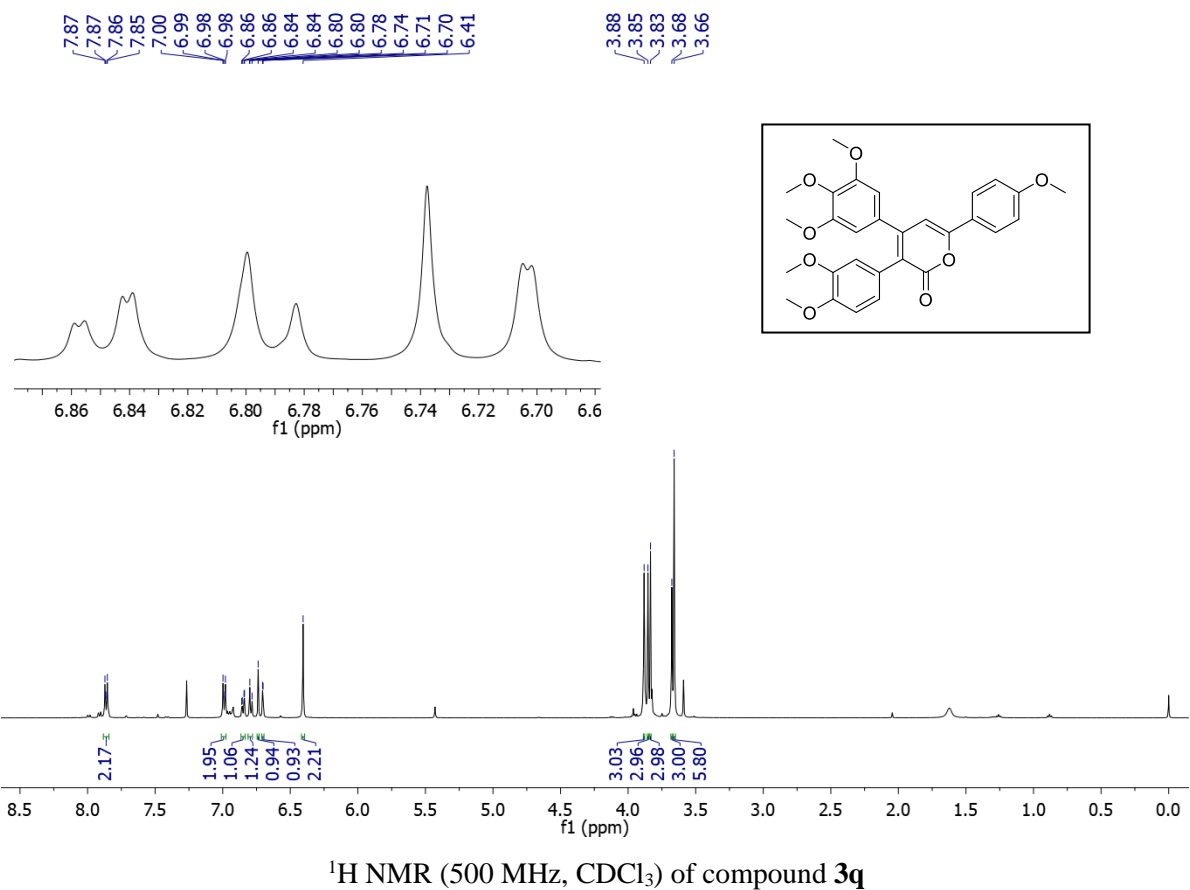

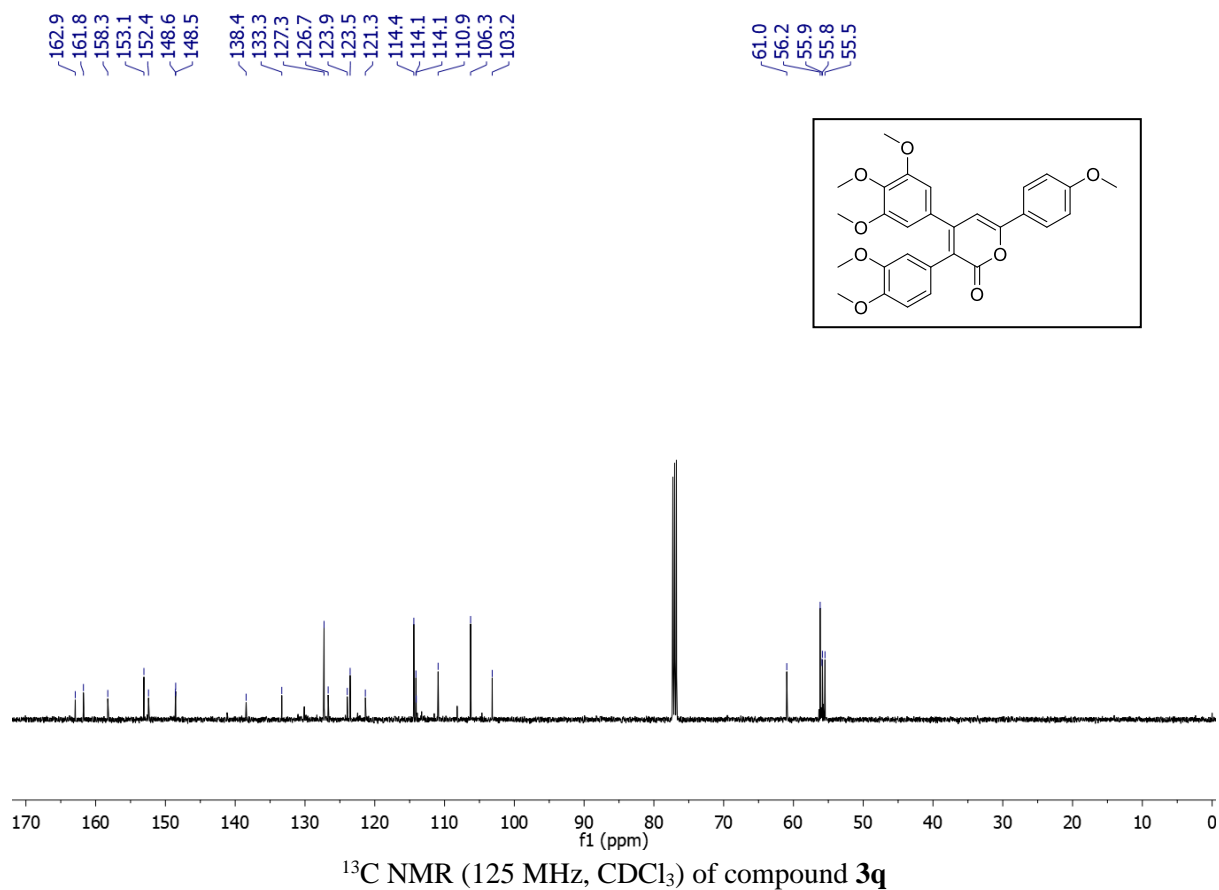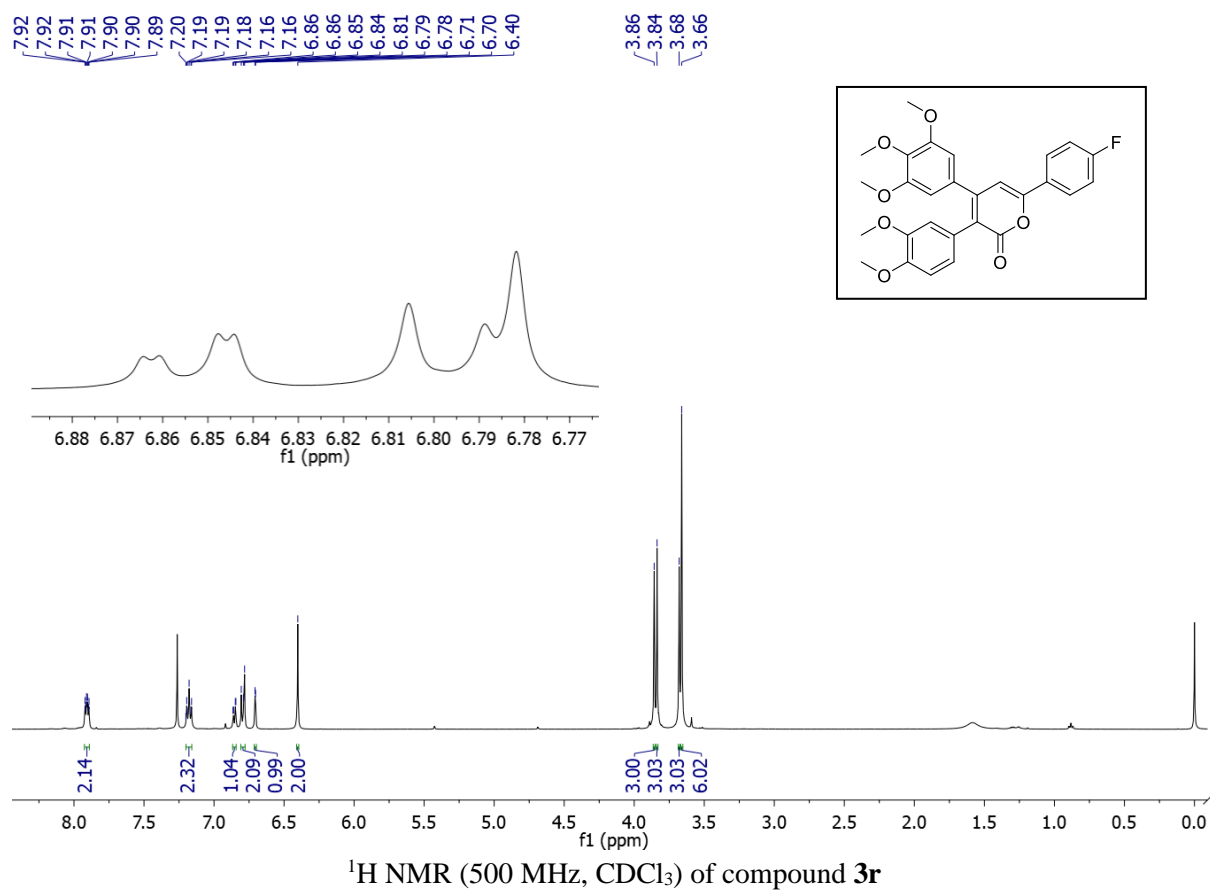



165.2  
163.2  
162.6  
157.1  
153.1  
152.1  
148.7  
148.6  
138.5  
133.0  
127.7  
127.7  
126.3  
123.5  
122.4  
116.3  
116.1  
114.0  
110.9  
106.2  
104.4

61.0  
56.2  
55.9  
55.9

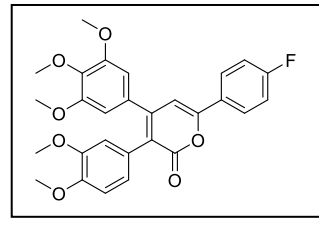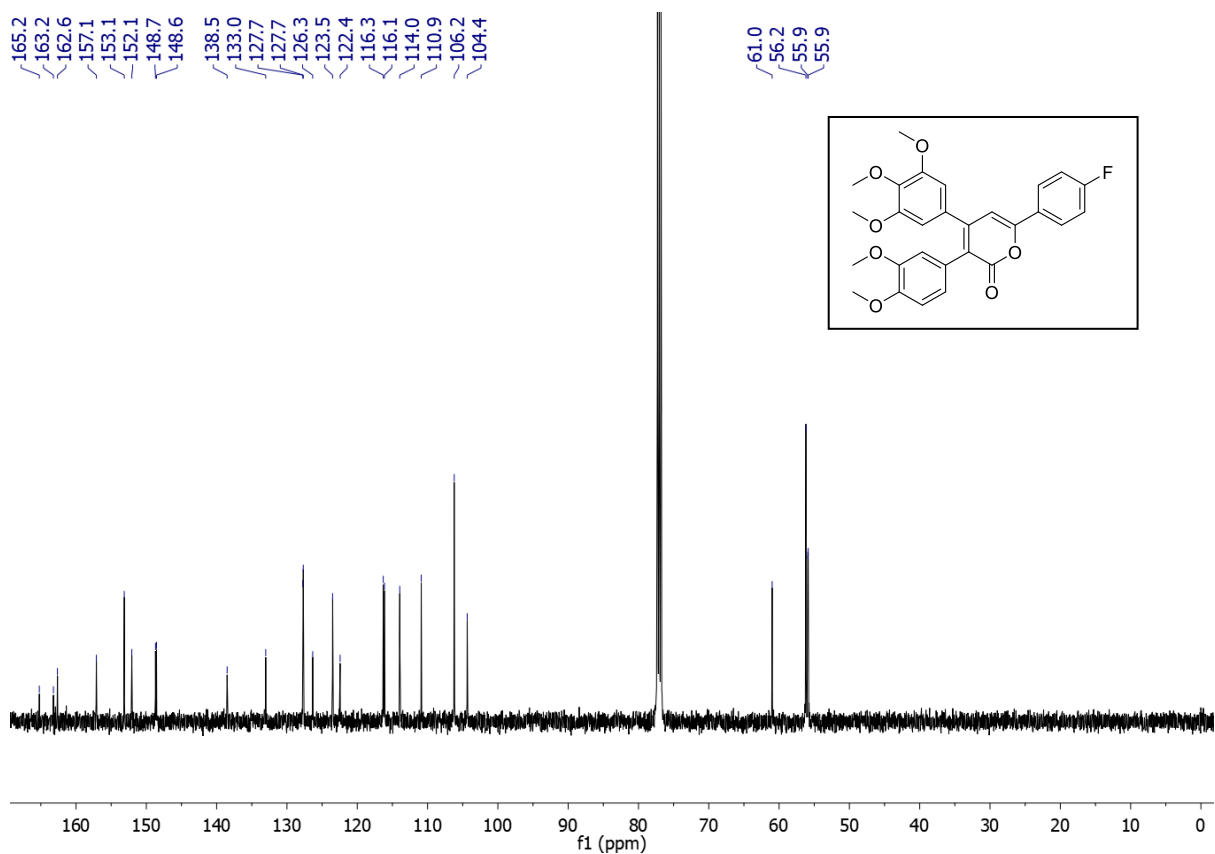

$^{13}\text{C}$  NMR (125 MHz,  $\text{CDCl}_3$ ) of compound **3r**

-106.1

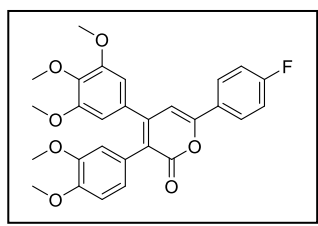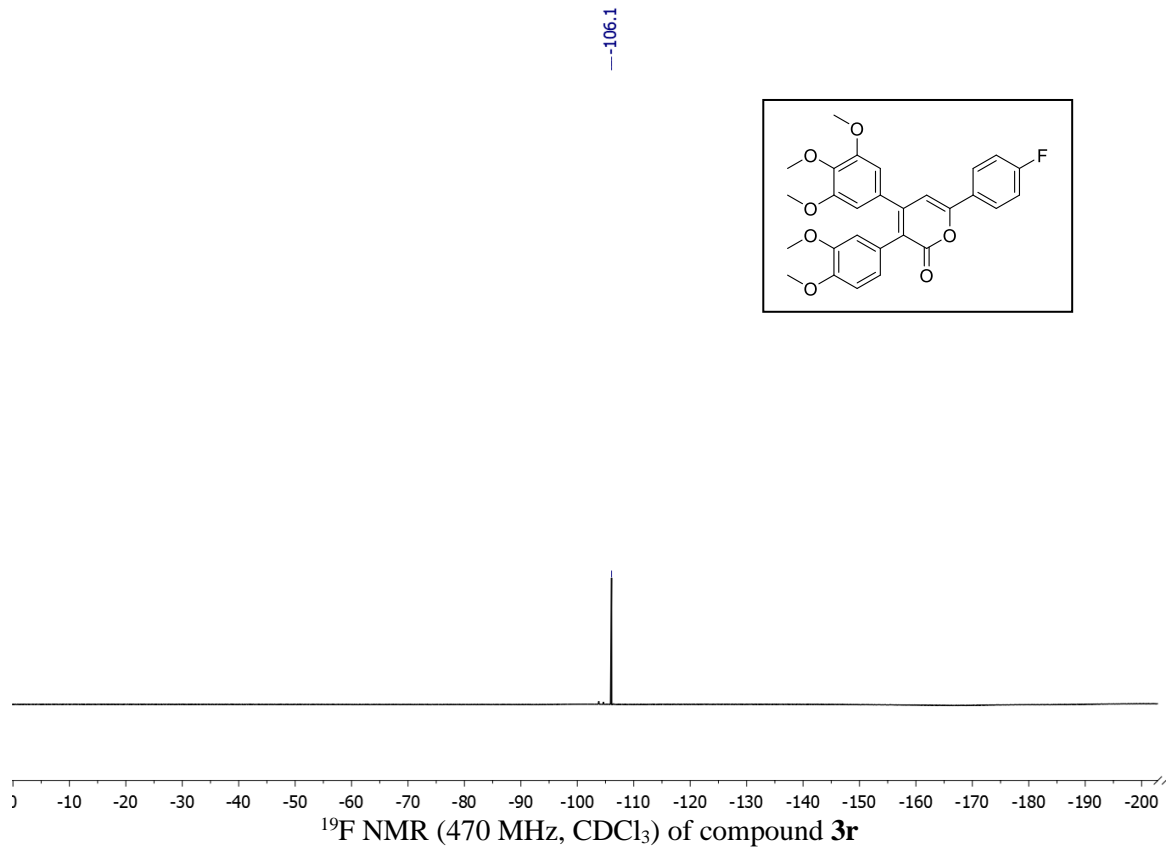

$^{19}\text{F}$  NMR (470 MHz,  $\text{CDCl}_3$ ) of compound **3r**

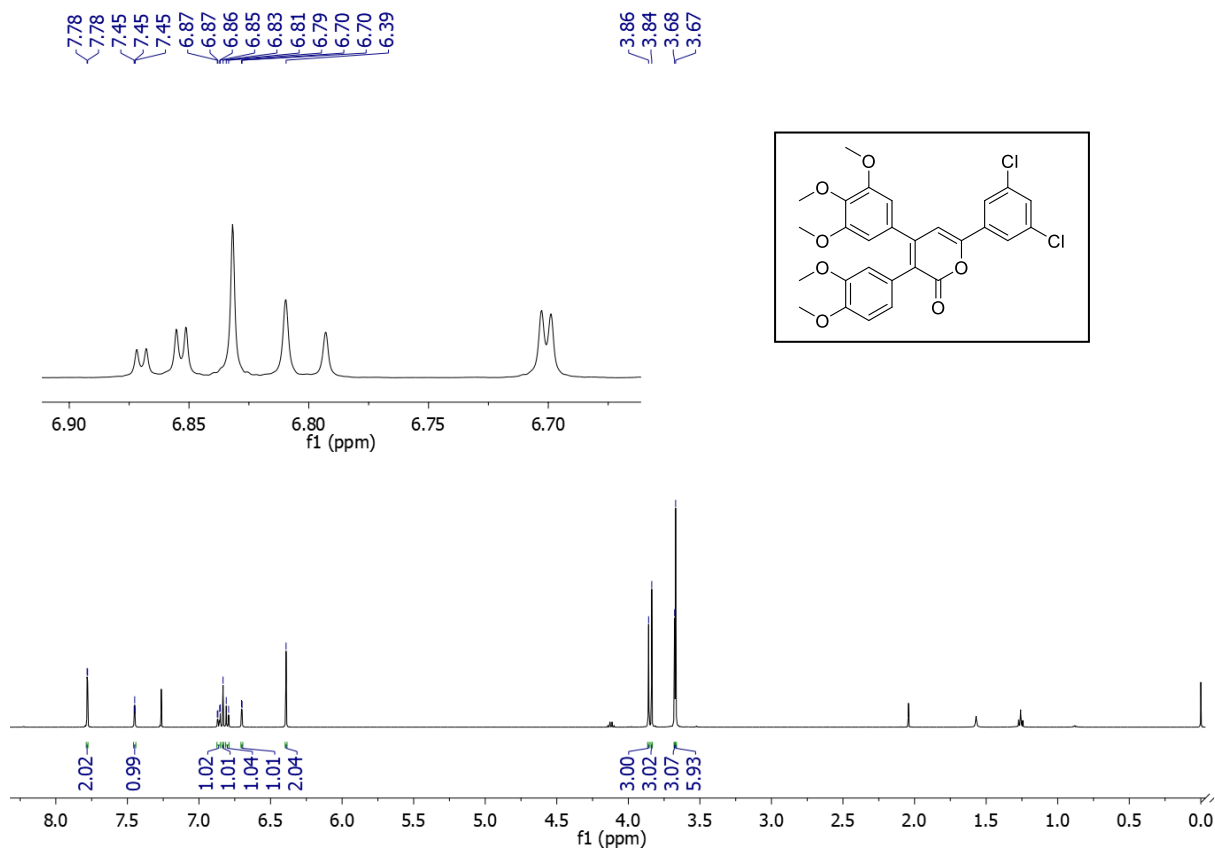

<sup>1</sup>H NMR (500 MHz, CDCl<sub>3</sub>) of compound **3s**

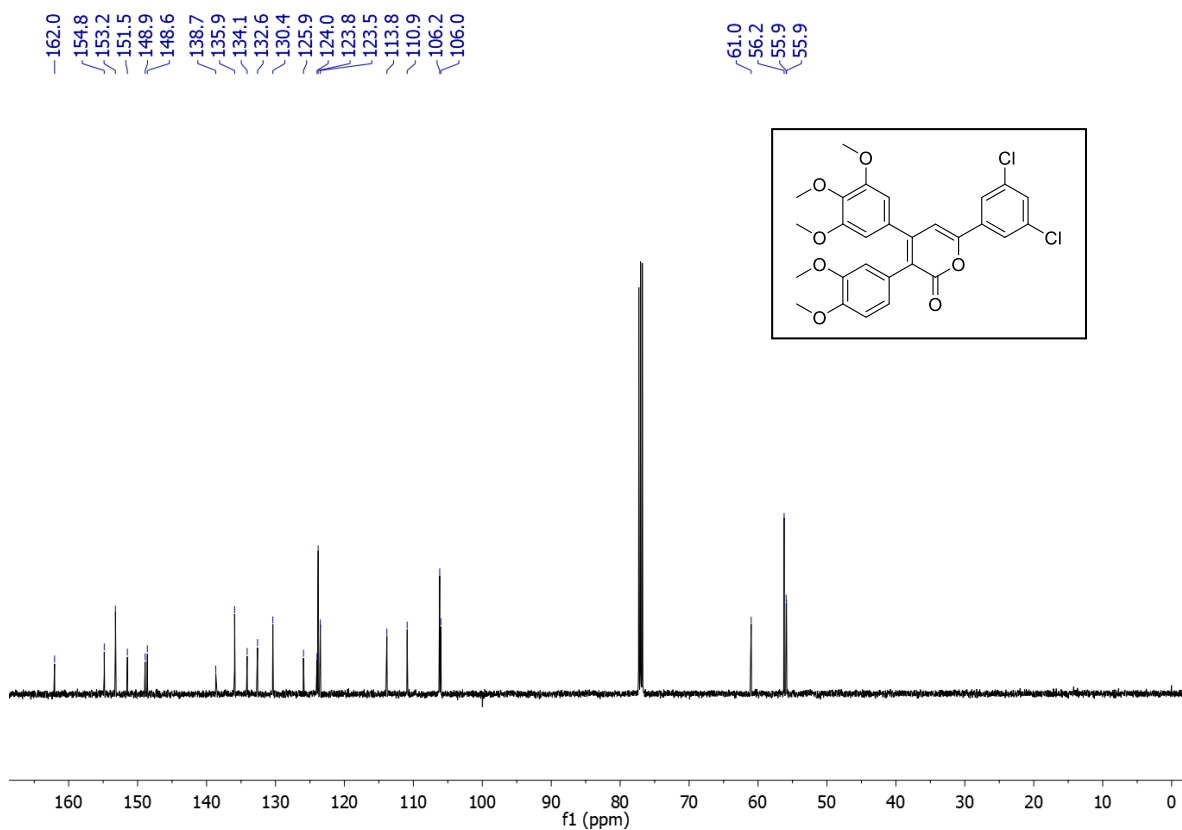

<sup>13</sup>C NMR (125 MHz, CDCl<sub>3</sub>) of compound **3s**

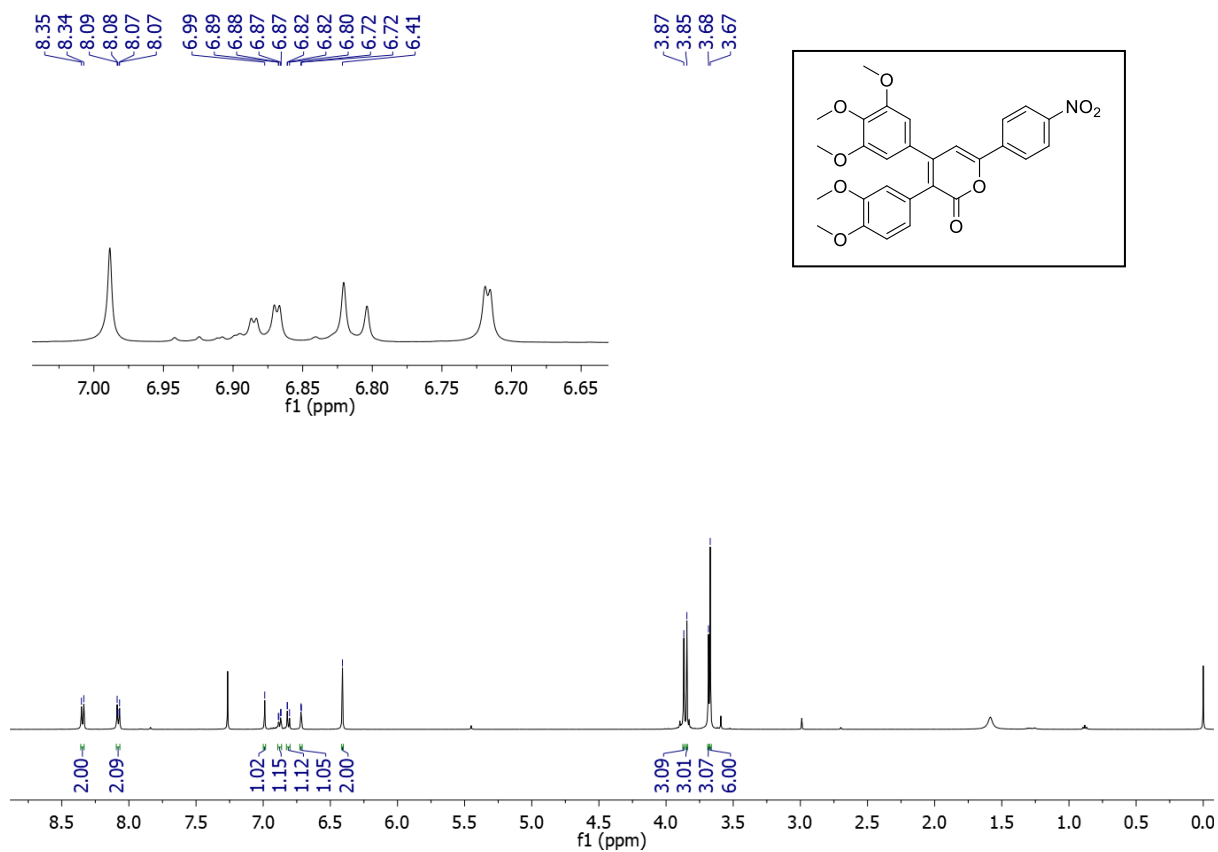

<sup>1</sup>H NMR (500 MHz, CDCl<sub>3</sub>) of compound **3t**

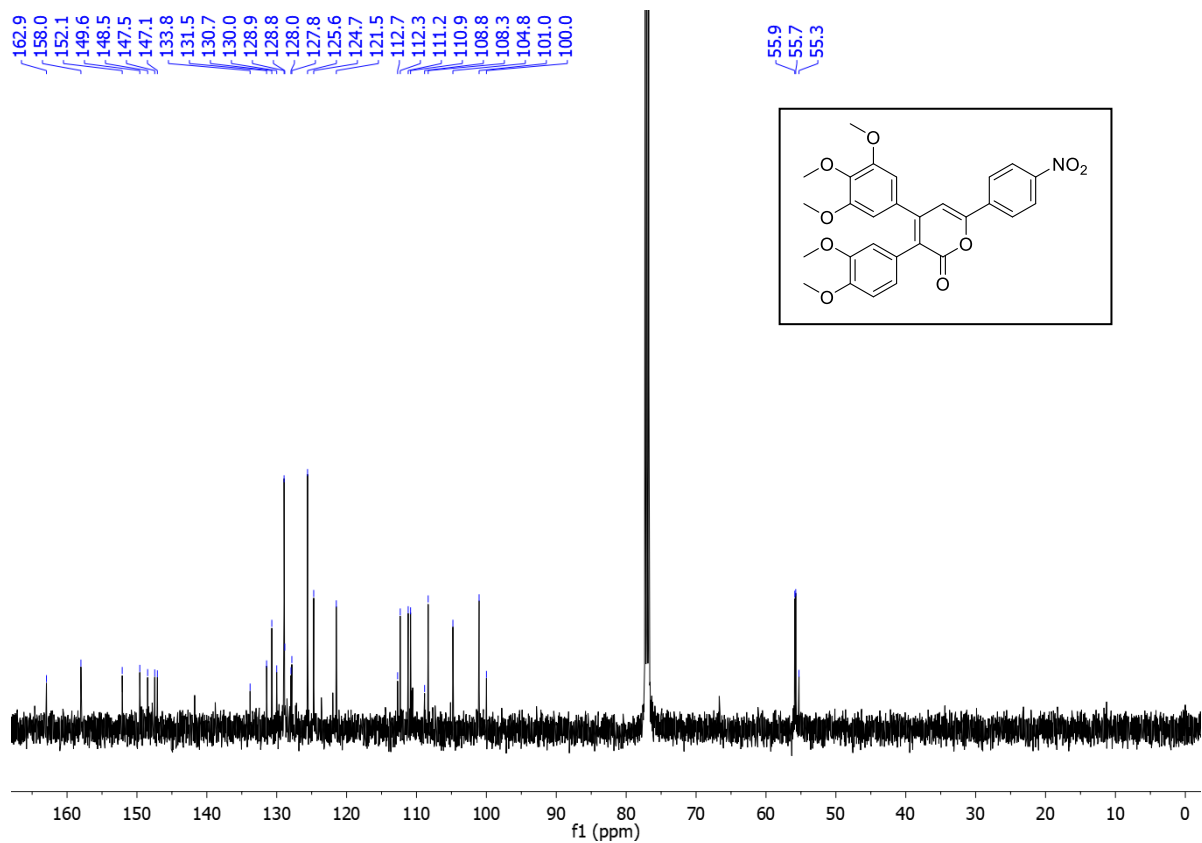

<sup>13</sup>C NMR (125 MHz, CDCl<sub>3</sub>) of compound **3t**

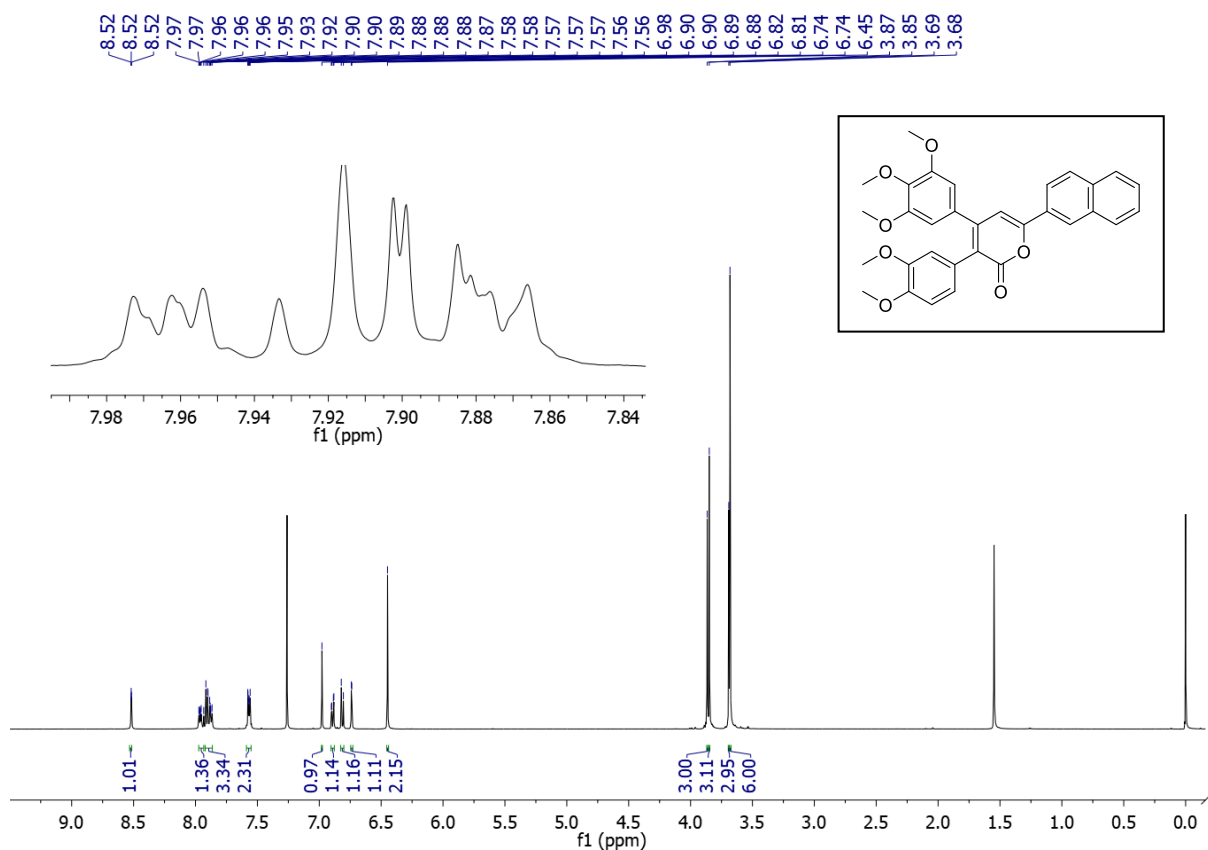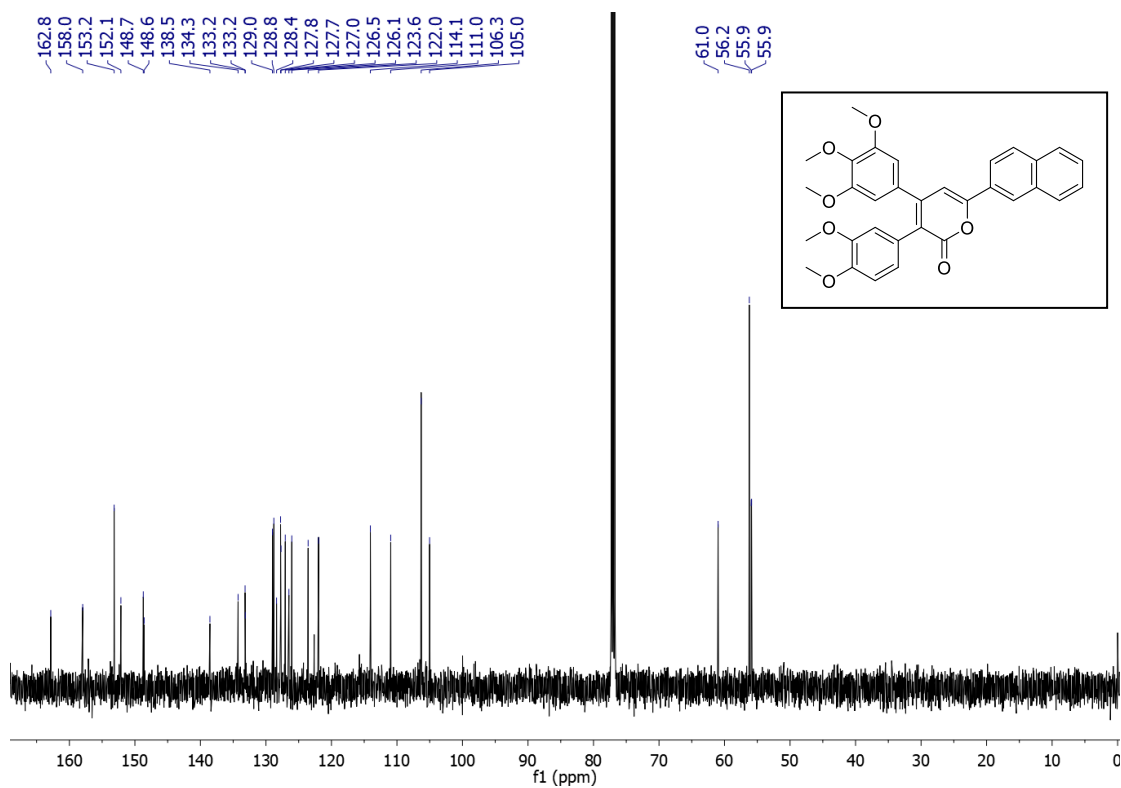

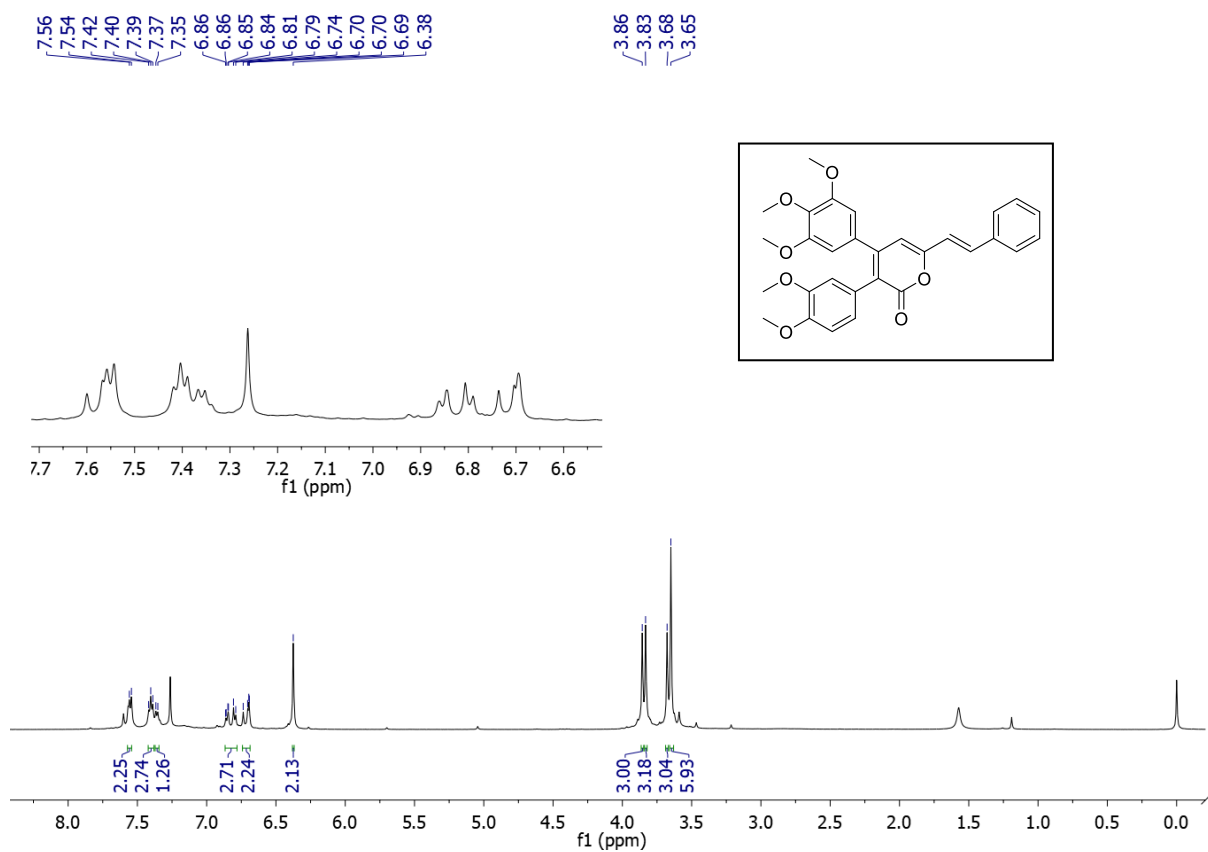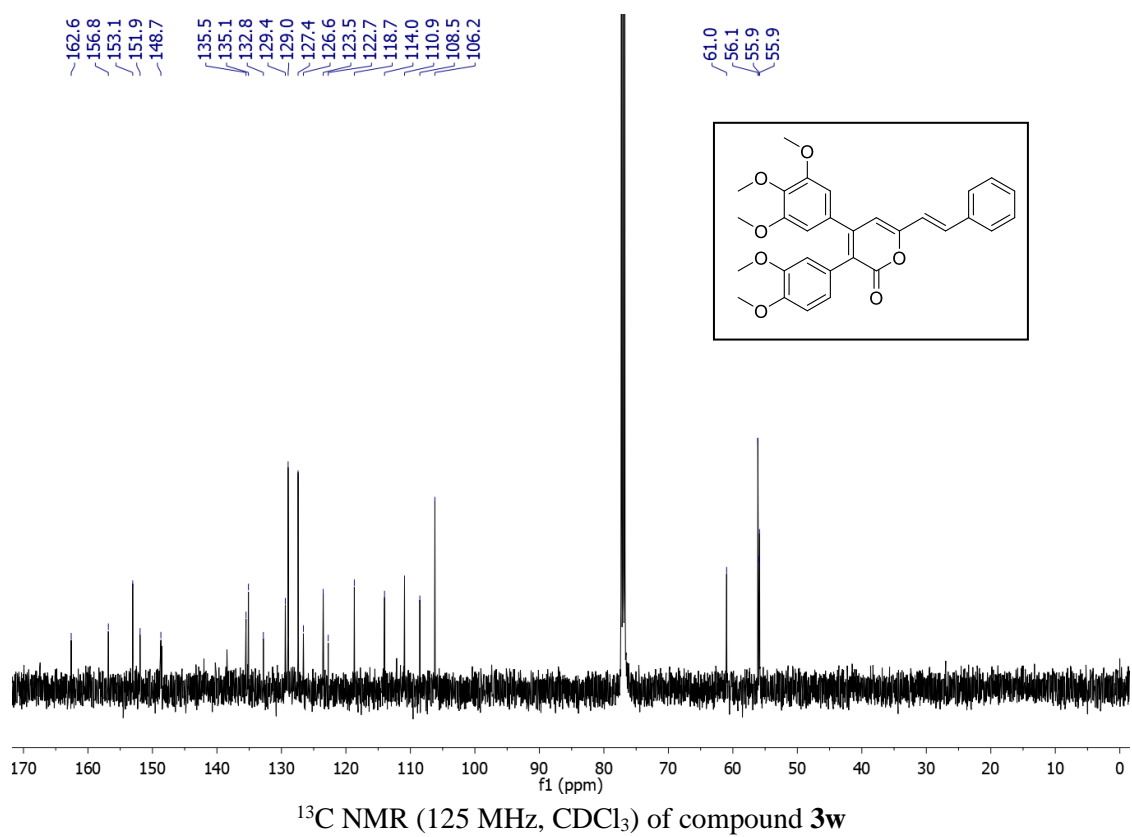

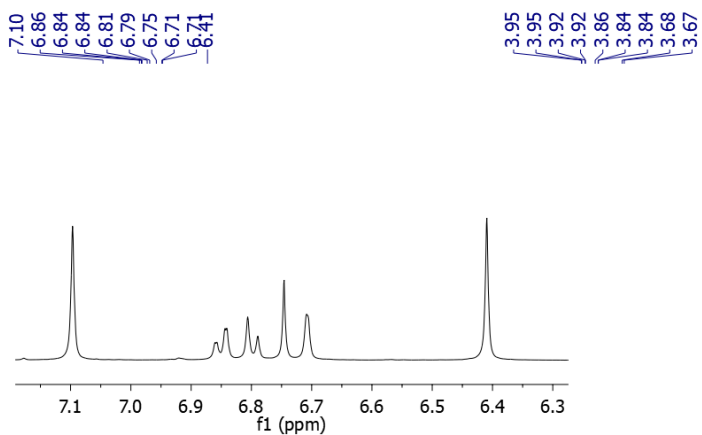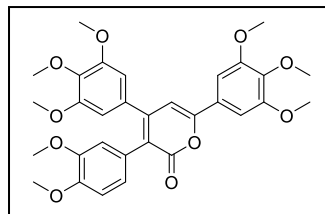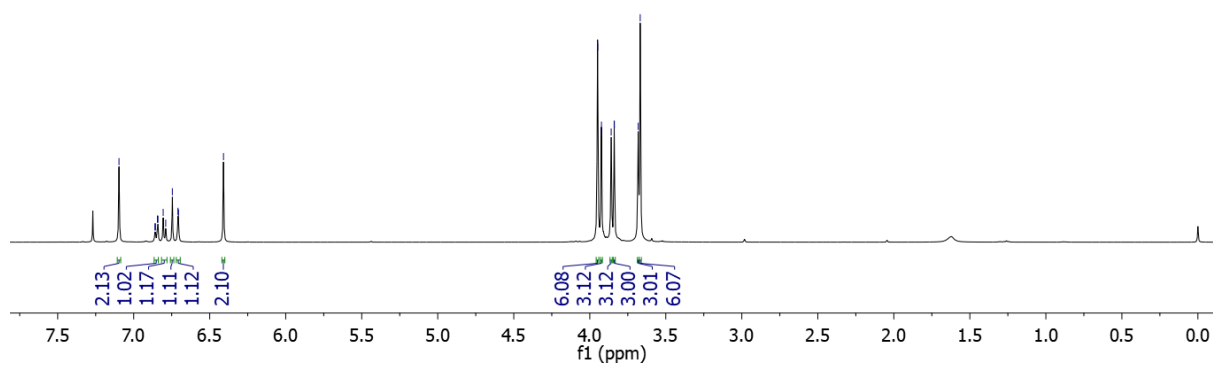

$^1\text{H}$  NMR (500 MHz,  $\text{CDCl}_3$ ) of compound **3x**

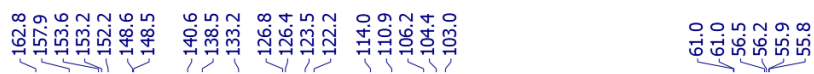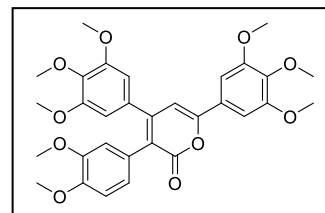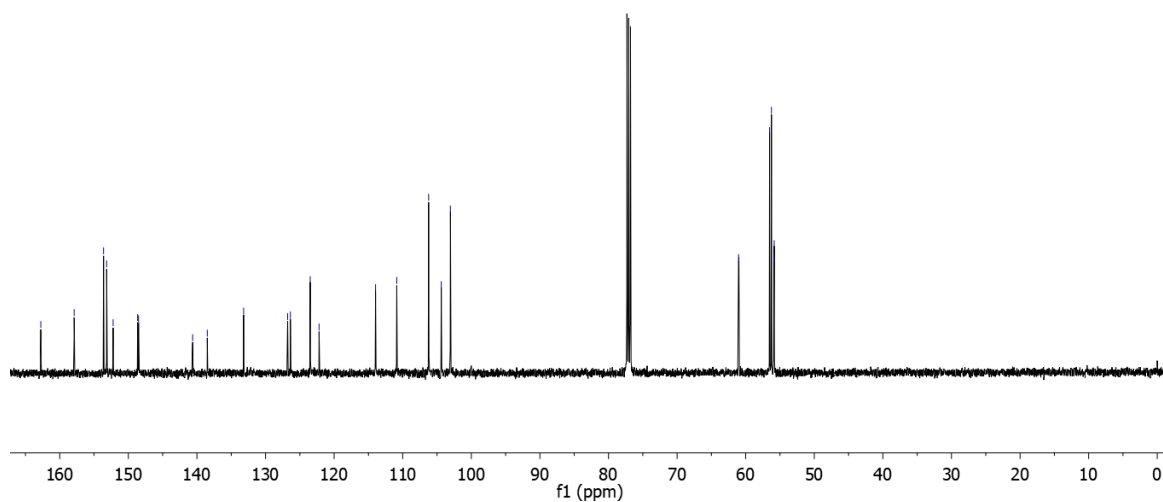

$^{13}\text{C}$  NMR (125 MHz,  $\text{CDCl}_3$ ) of compound **3x**

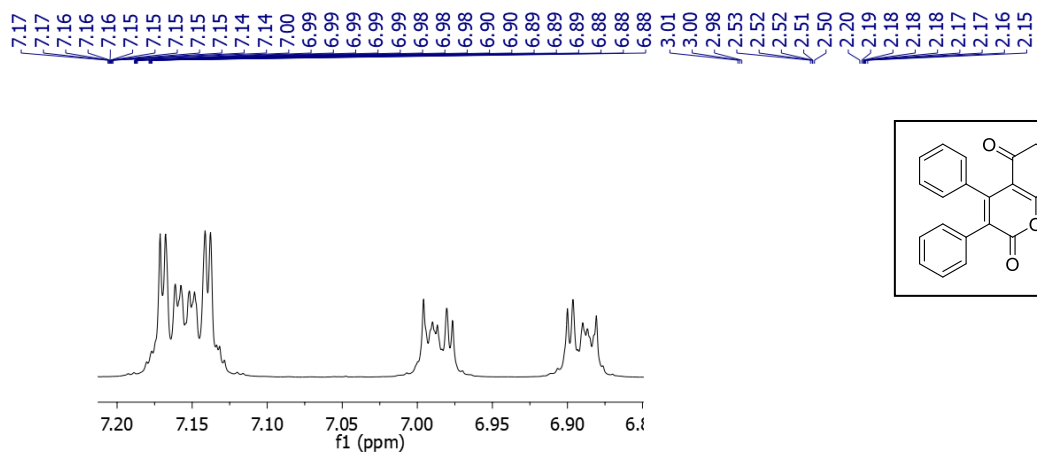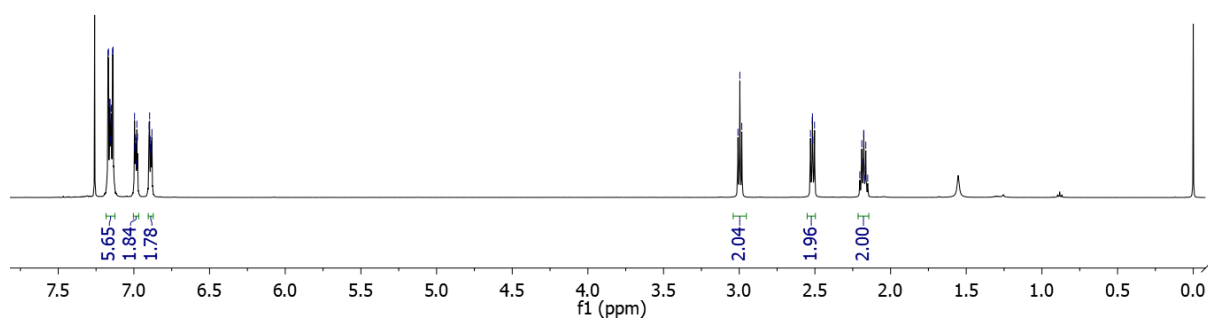

<sup>1</sup>H NMR (500 MHz, CDCl<sub>3</sub>) of compound **5a**

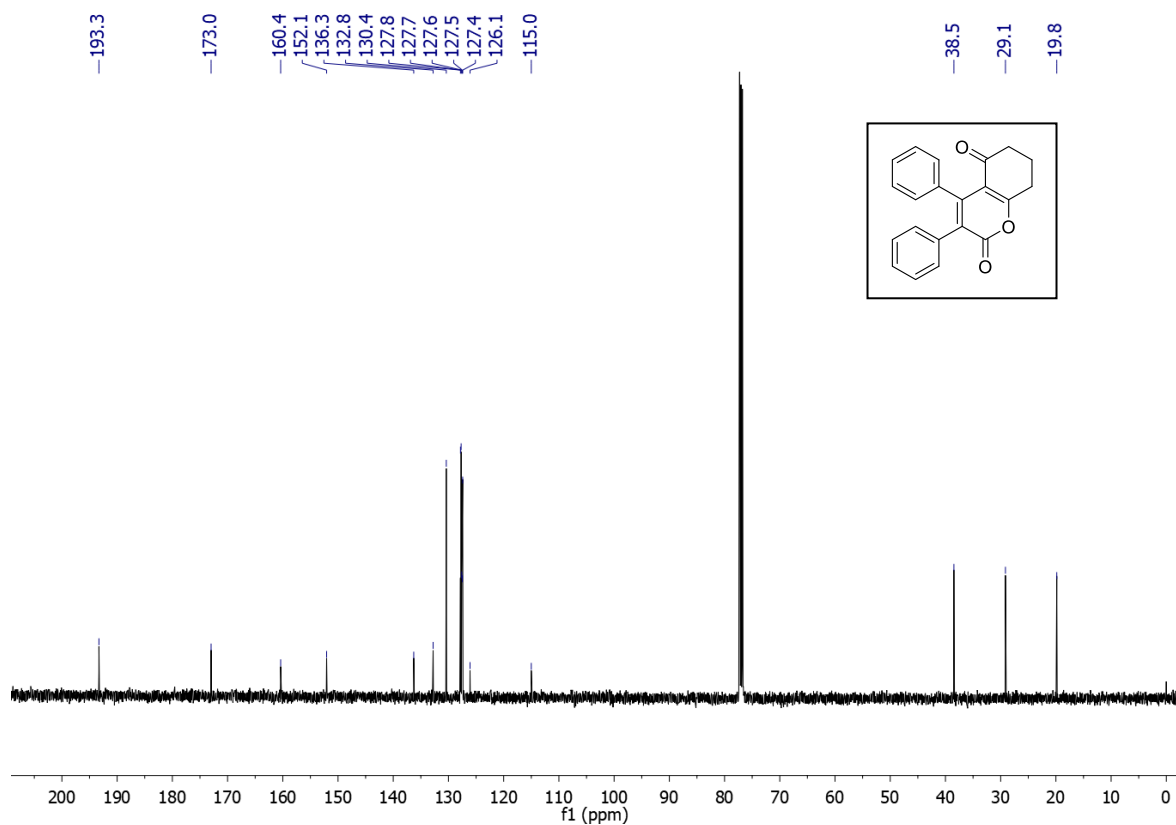

<sup>13</sup>C NMR (125 MHz, CDCl<sub>3</sub>) of compound **5a**

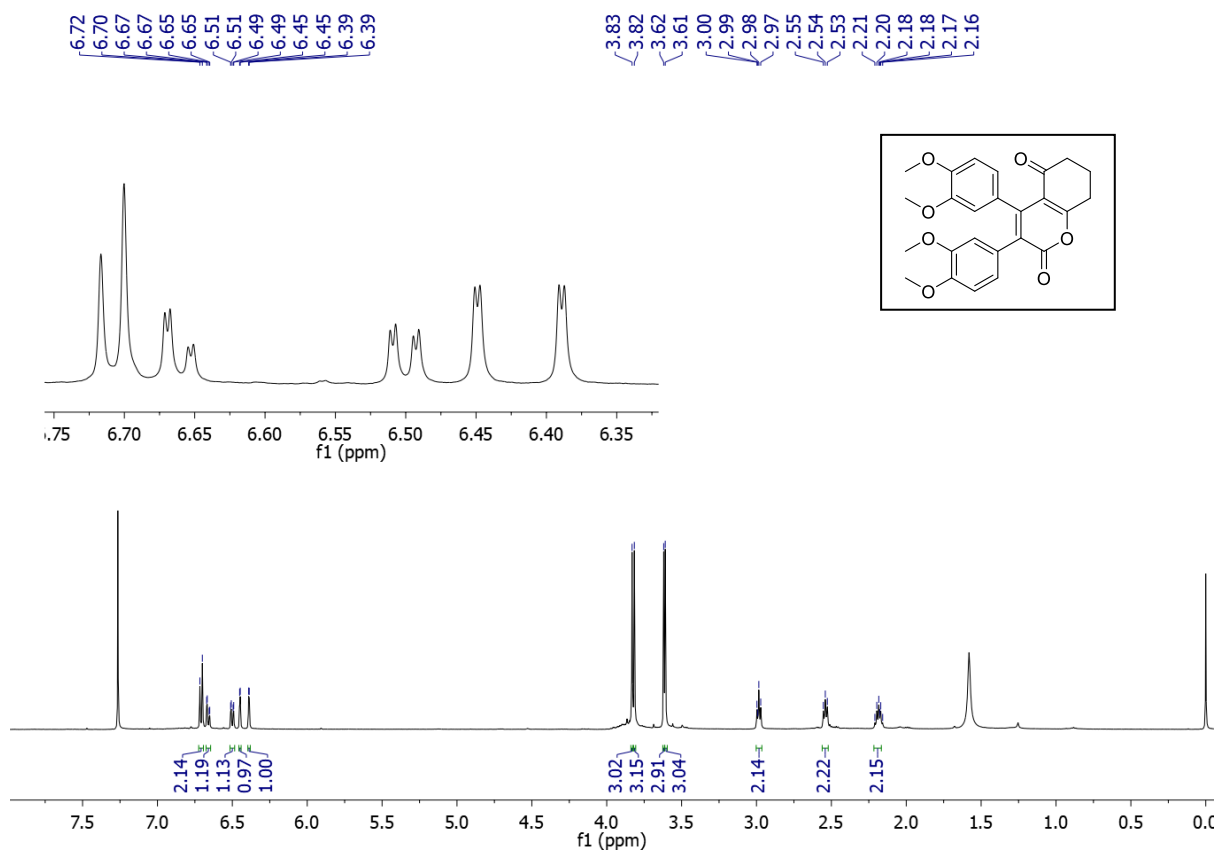

<sup>1</sup>H NMR (500 MHz, CDCl<sub>3</sub>) of compound **5b**

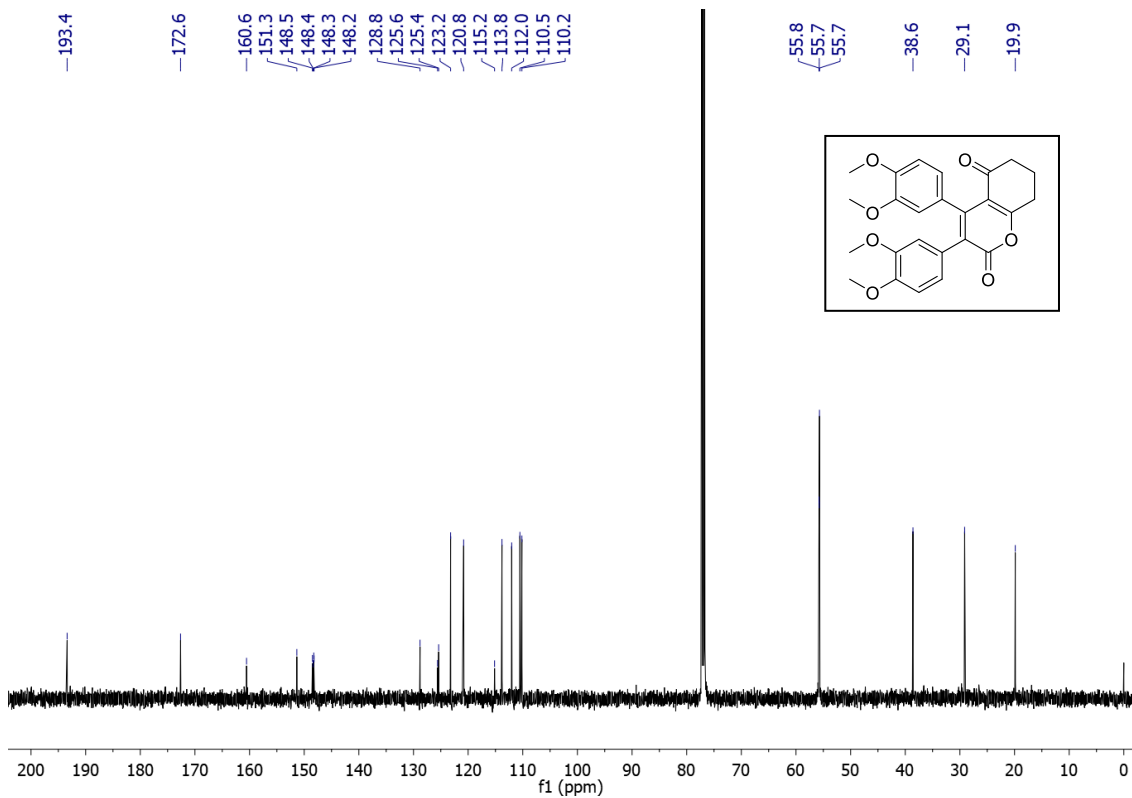

<sup>13</sup>C NMR (125 MHz, CDCl<sub>3</sub>) of compound **5b**



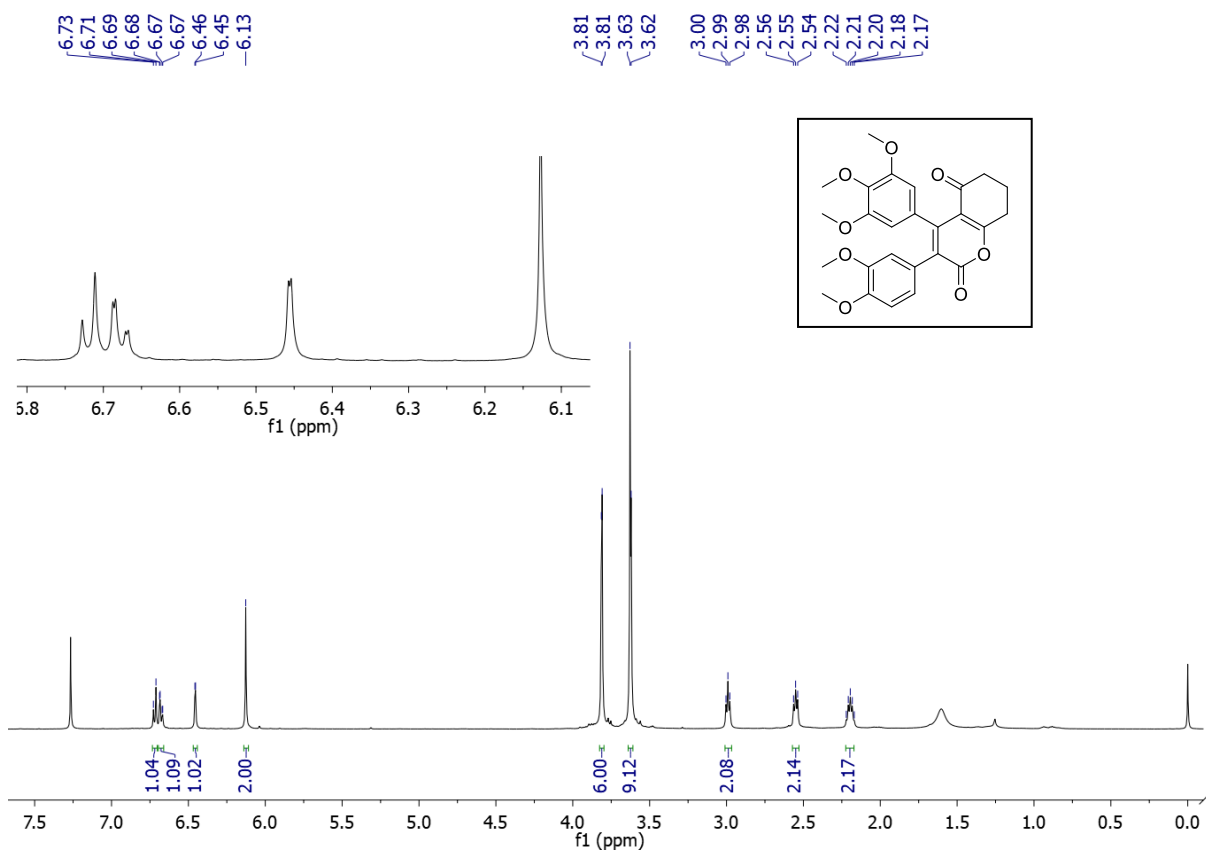

<sup>1</sup>H NMR (500 MHz, CDCl<sub>3</sub>) of compound **5c**

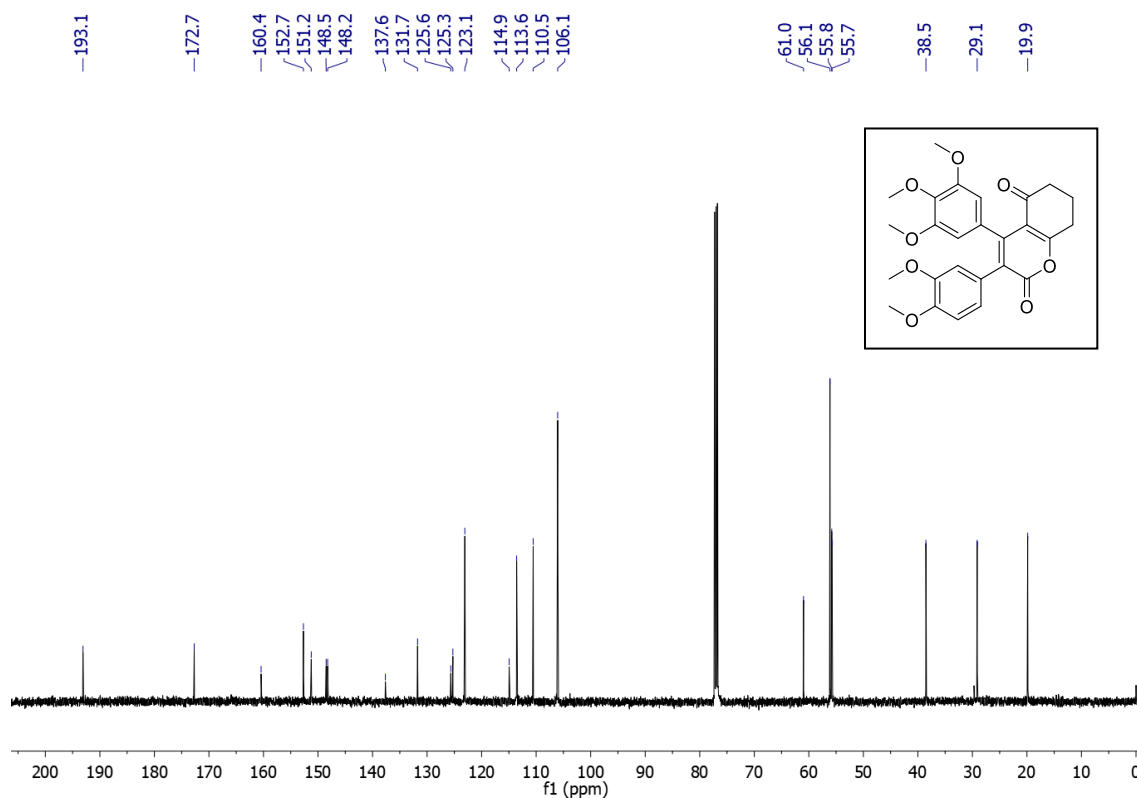

<sup>13</sup>C NMR (125 MHz, CDCl<sub>3</sub>) of compound **5c**

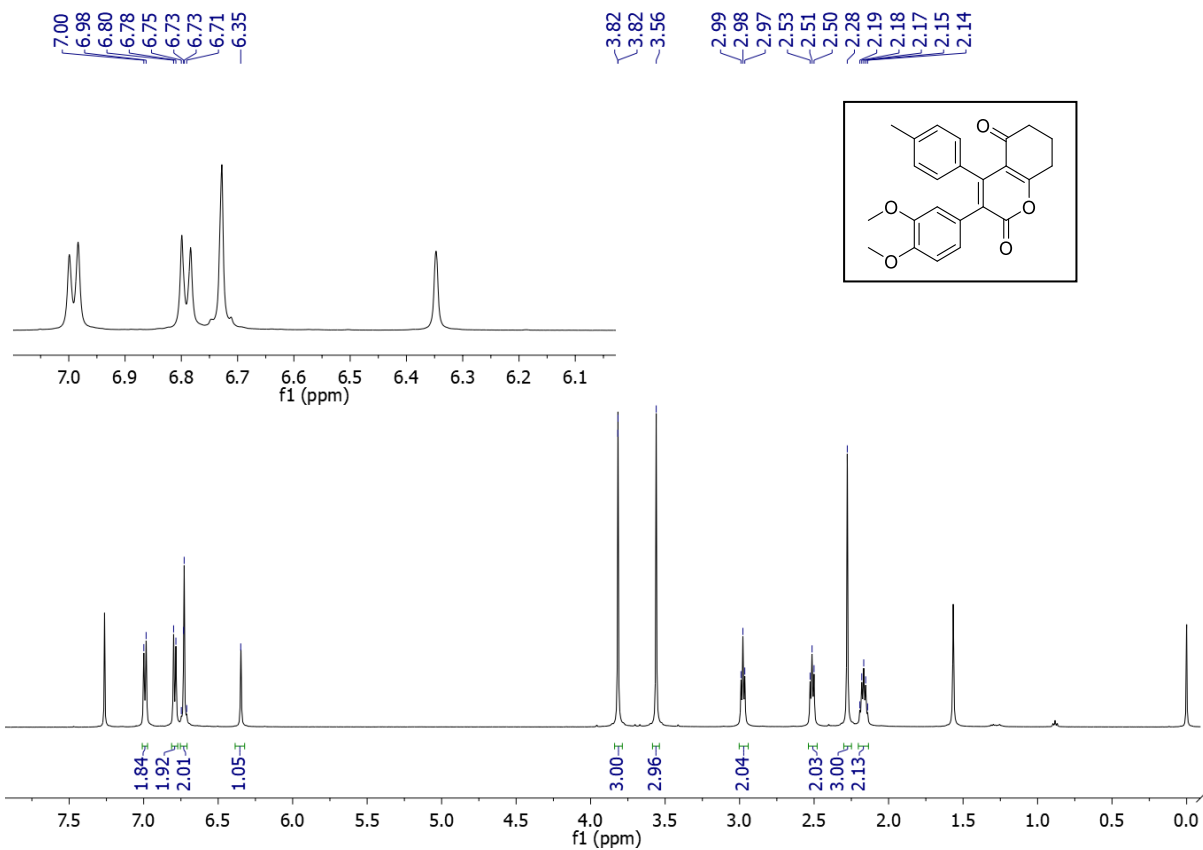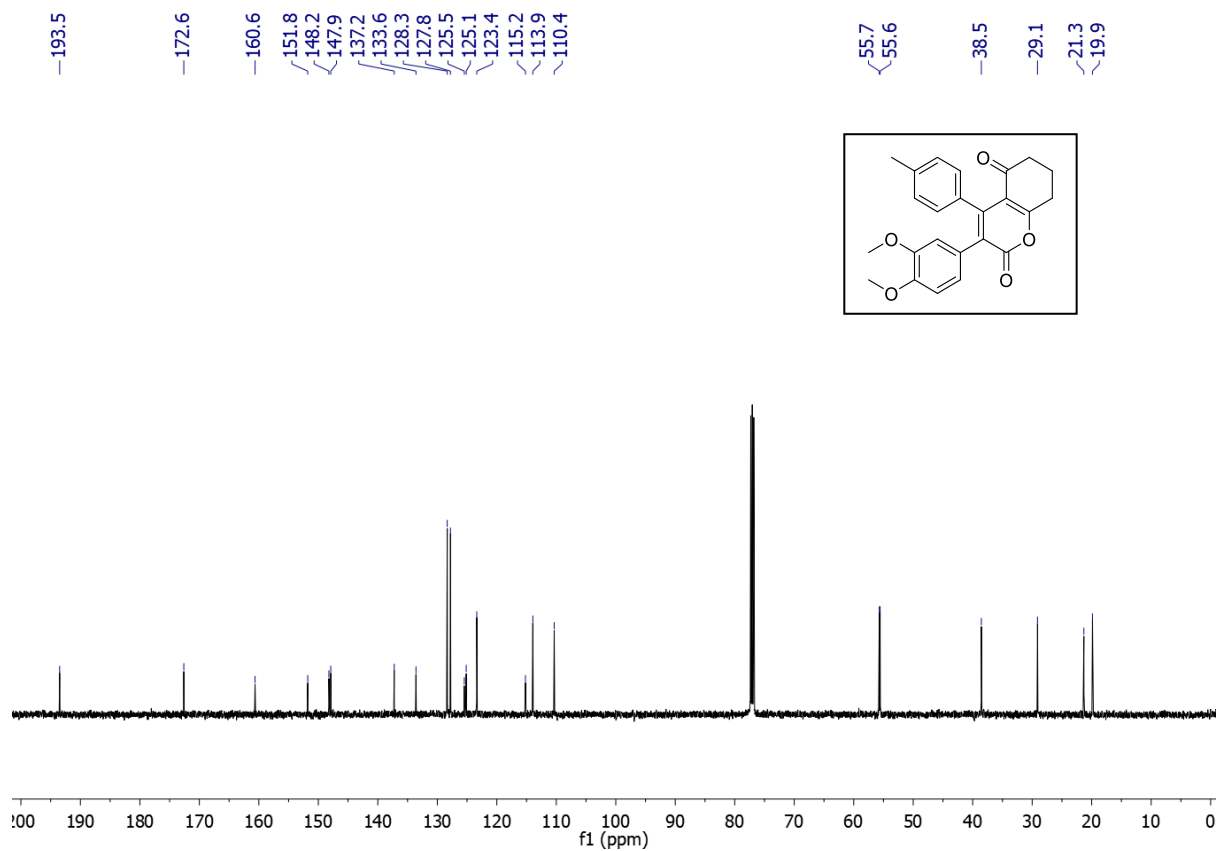

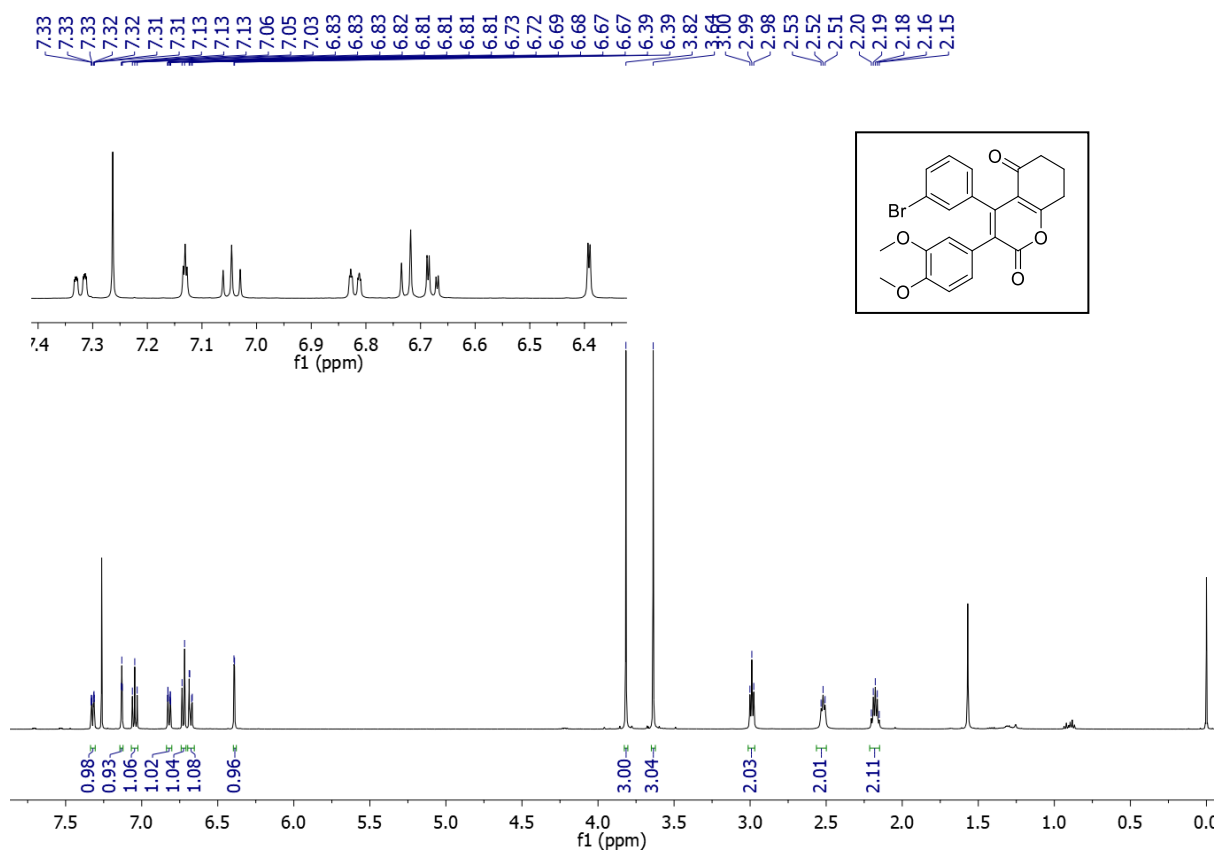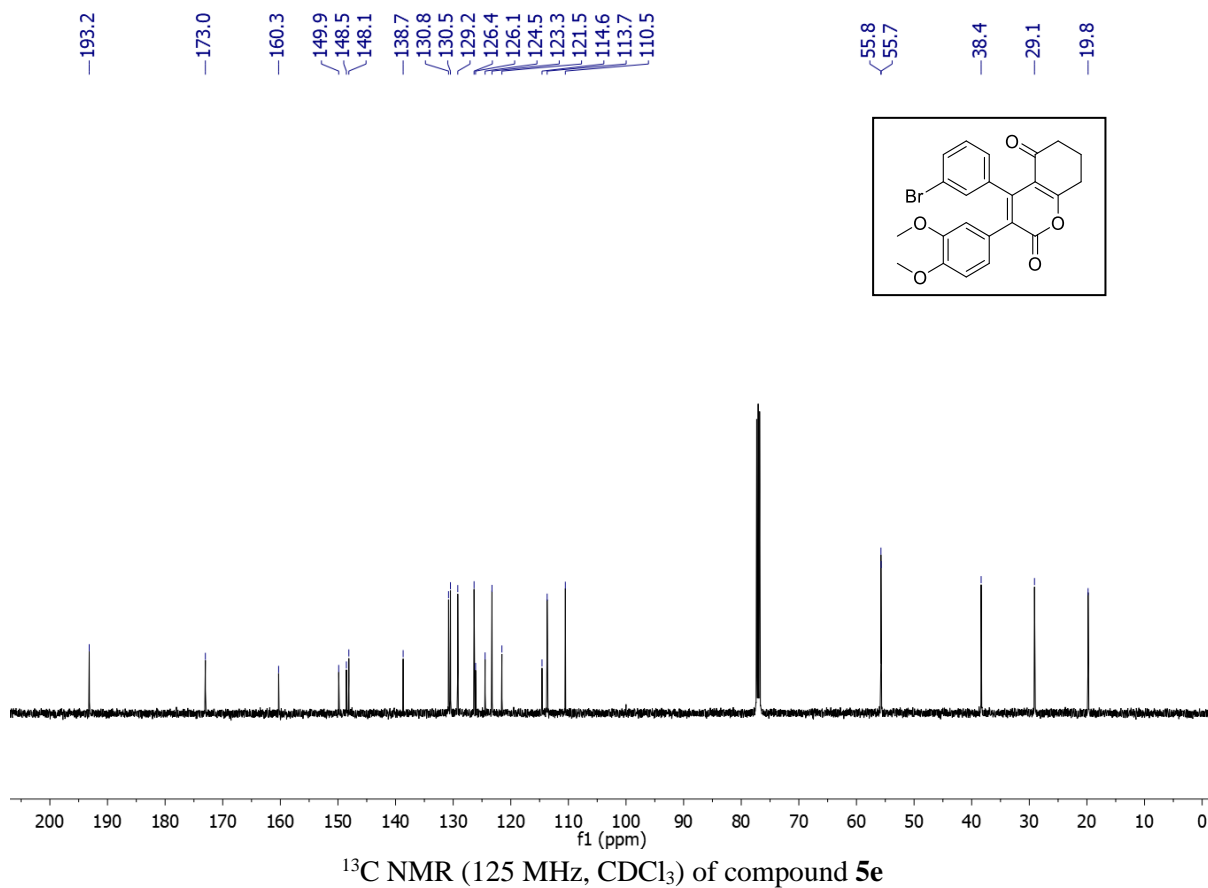

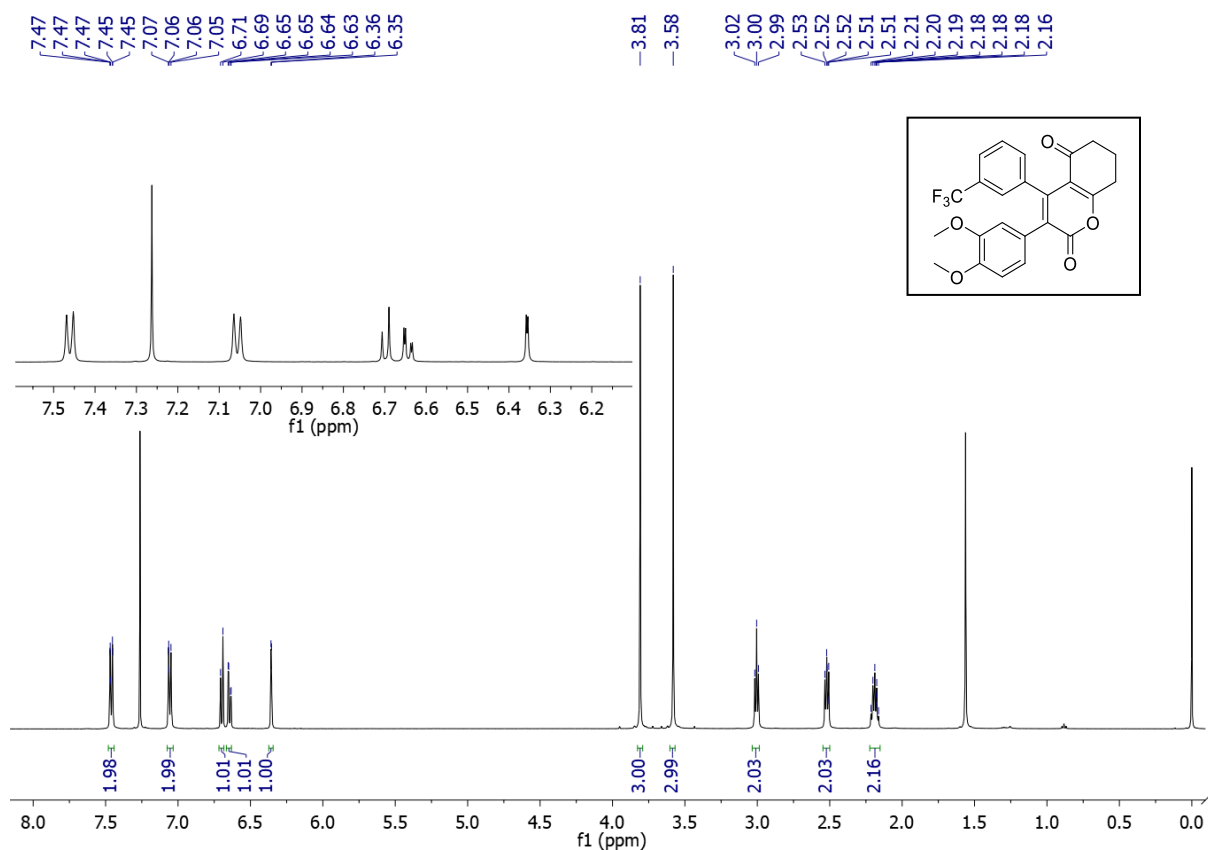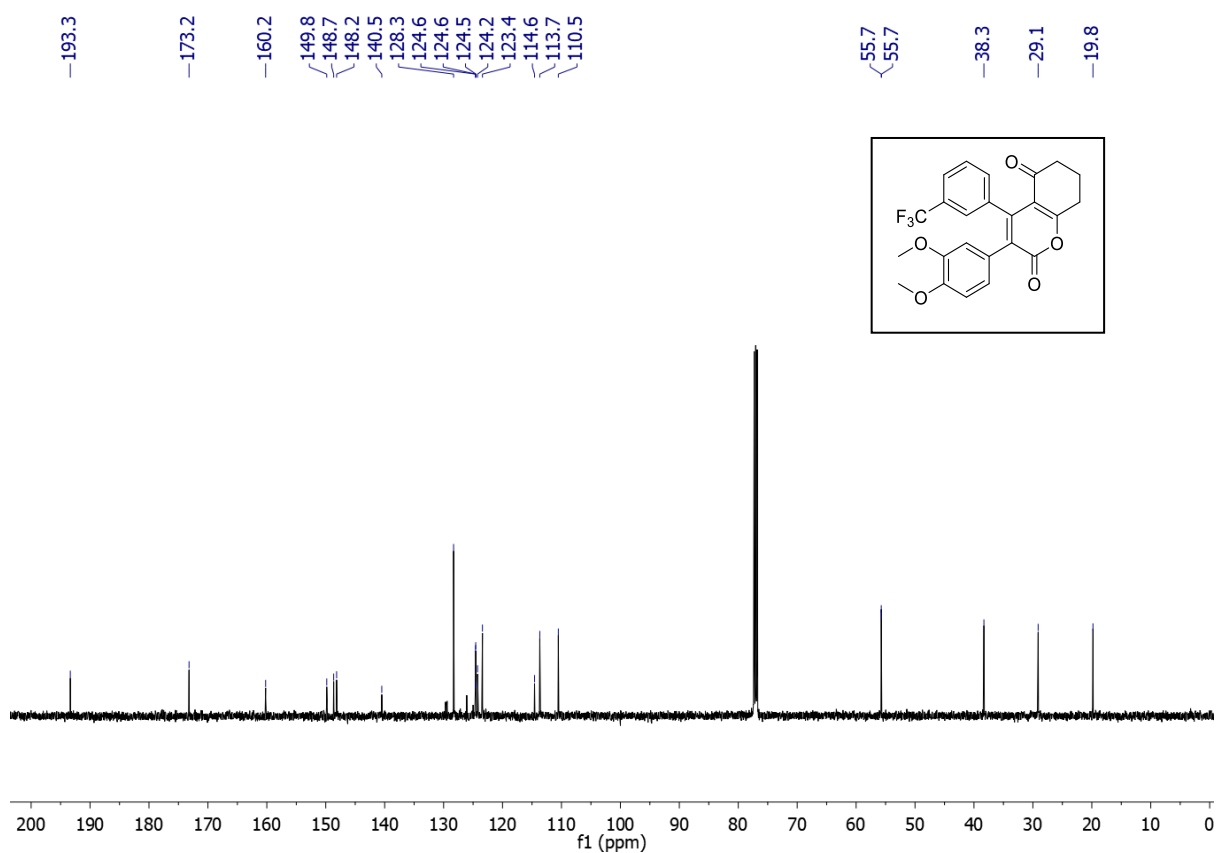

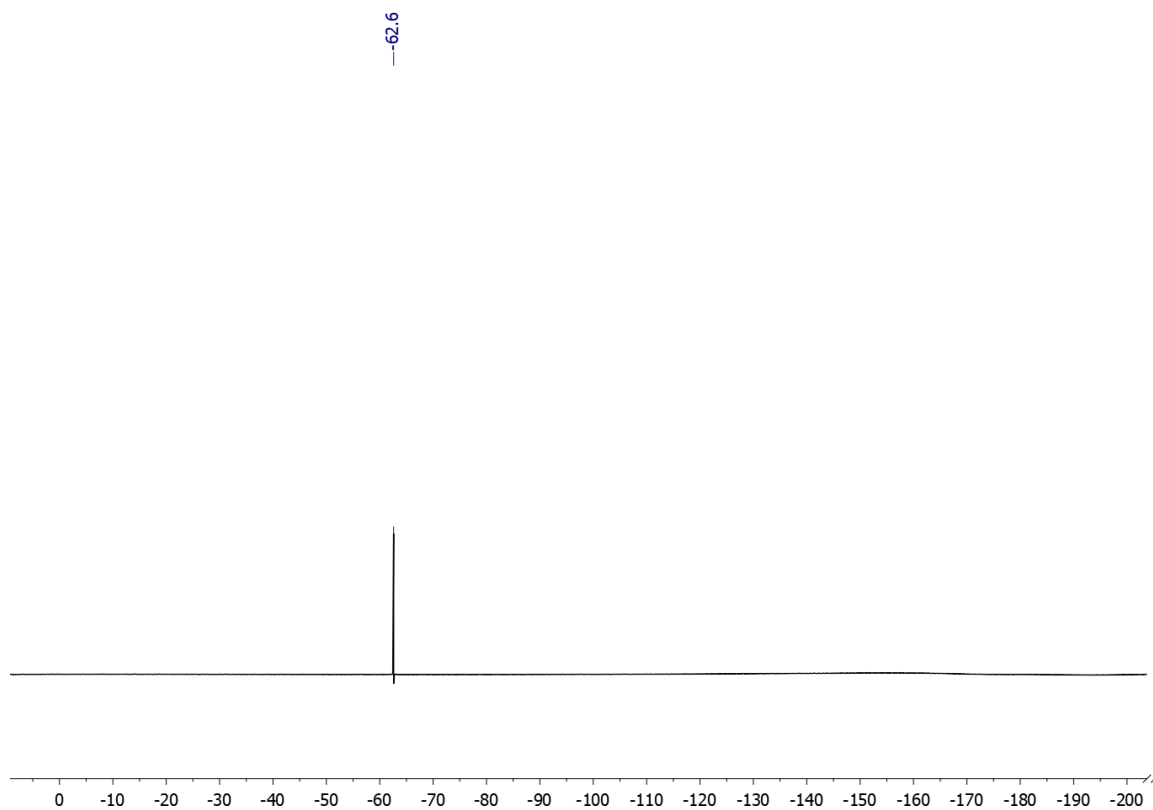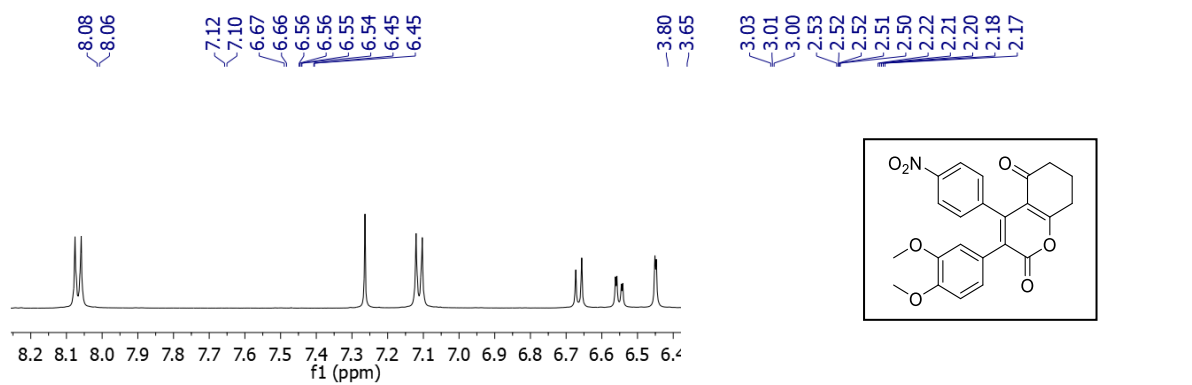

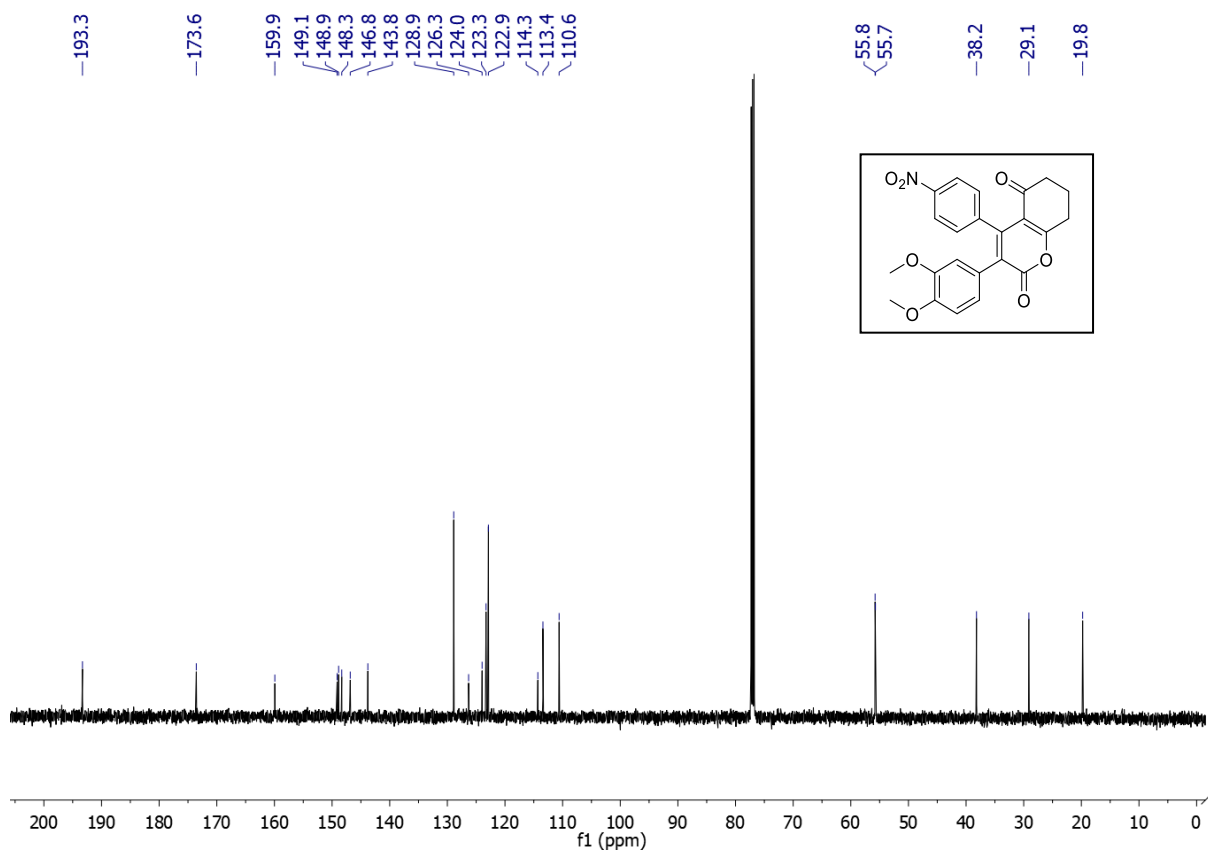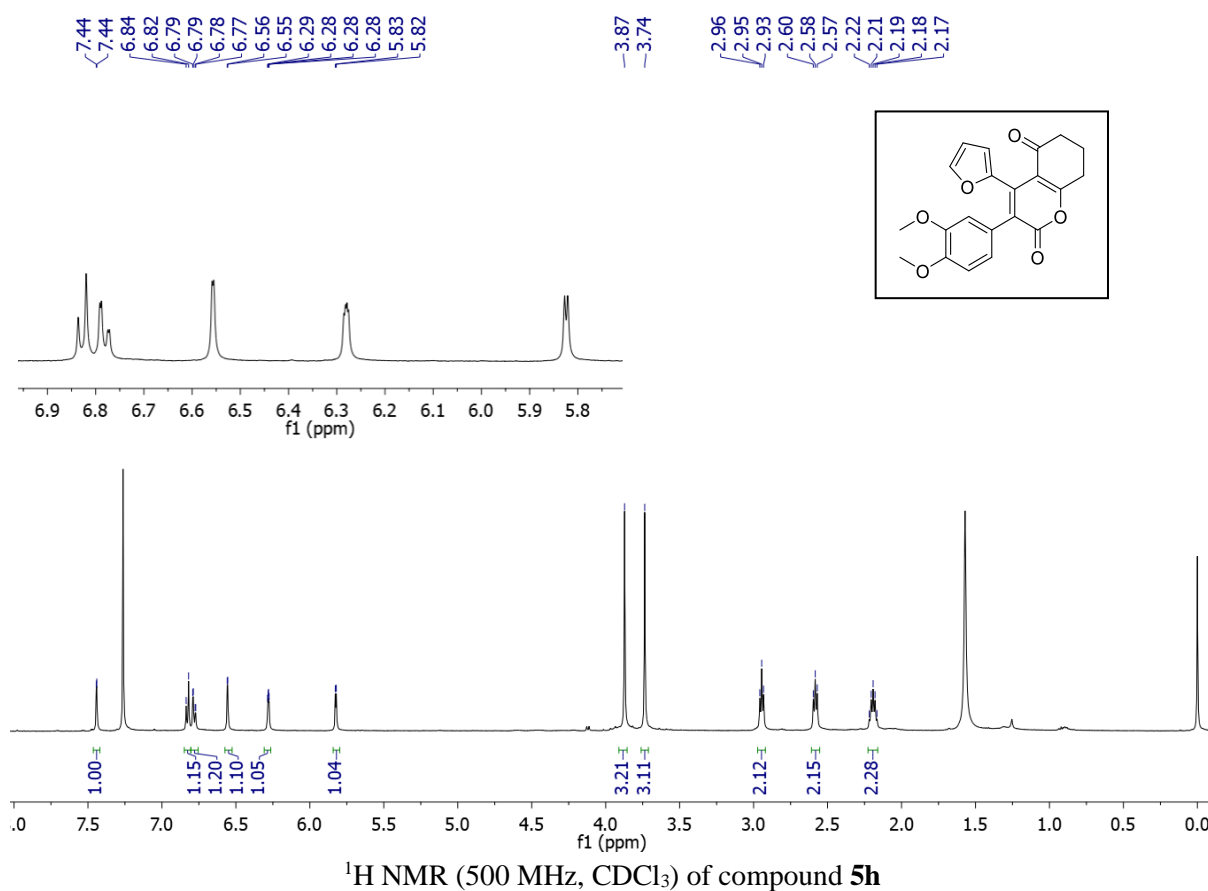

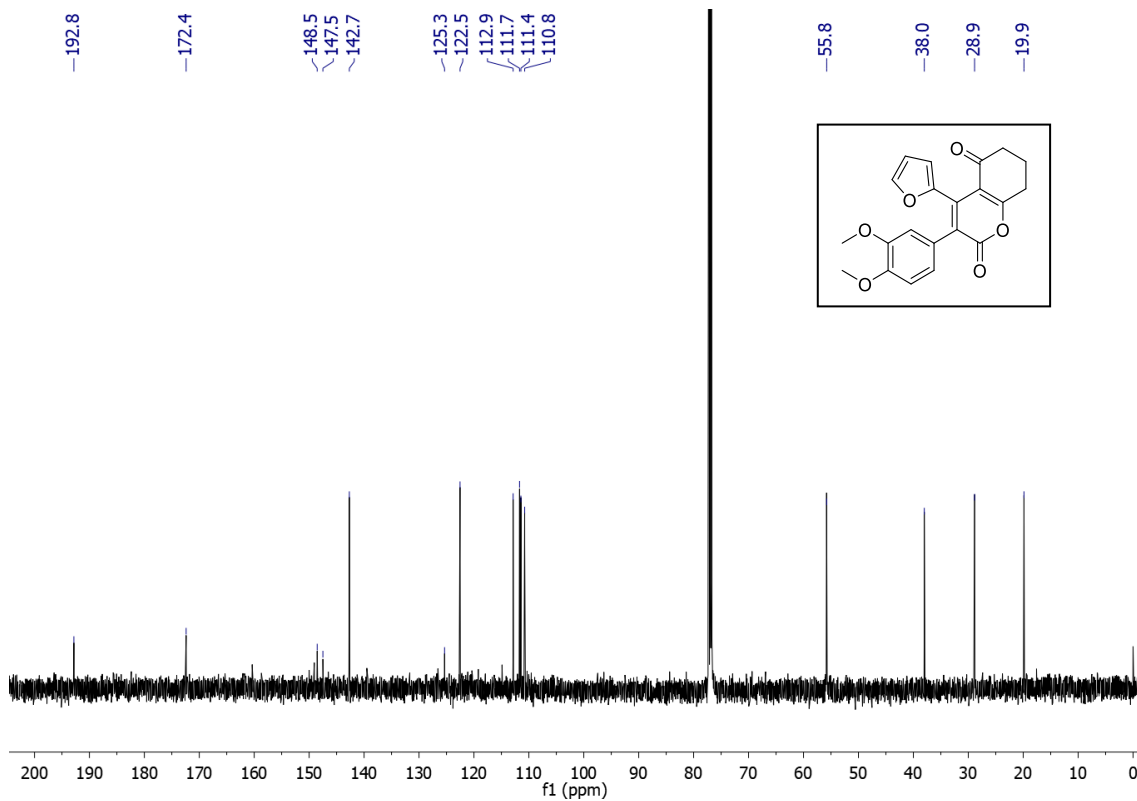

$^{13}\text{C}$  NMR (125 MHz,  $\text{CDCl}_3$ ) of compound **5h**

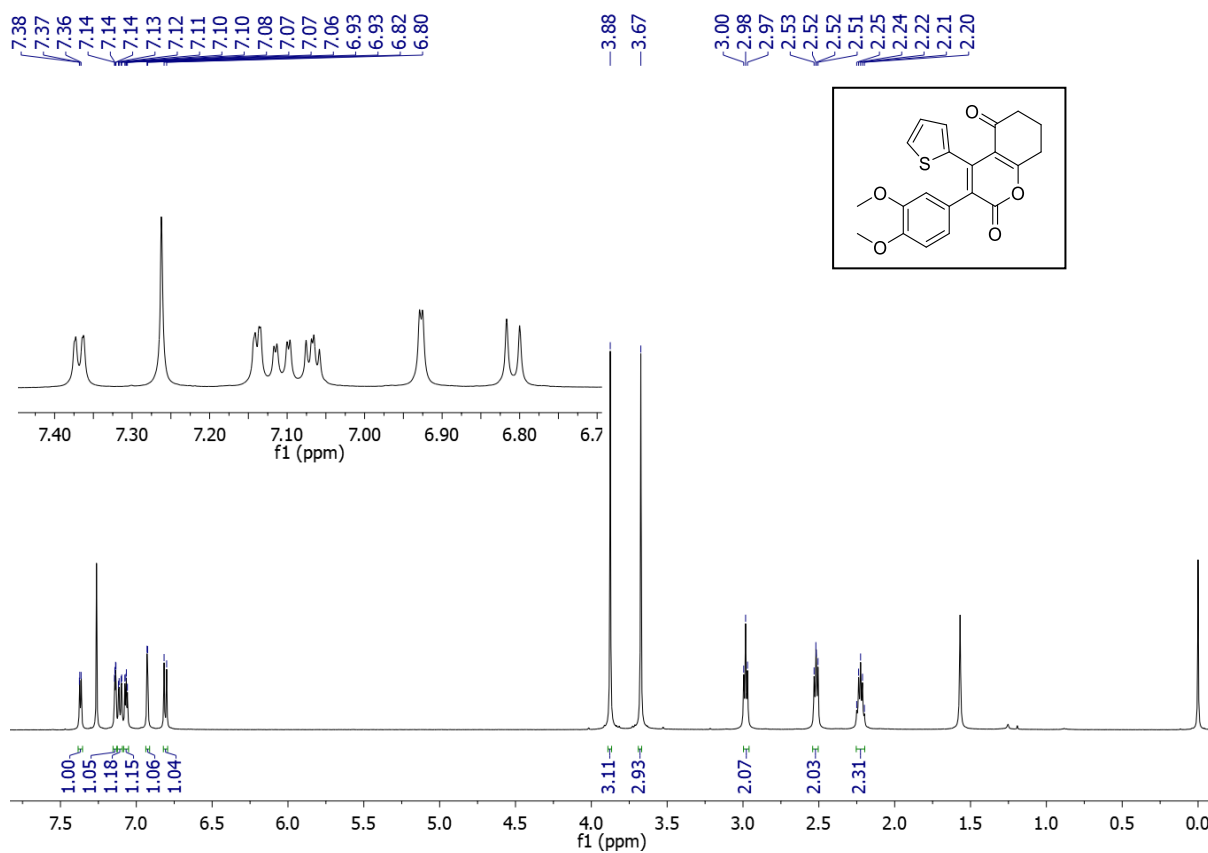

$^1\text{H}$  NMR (500 MHz,  $\text{CDCl}_3$ ) of compound **5i**

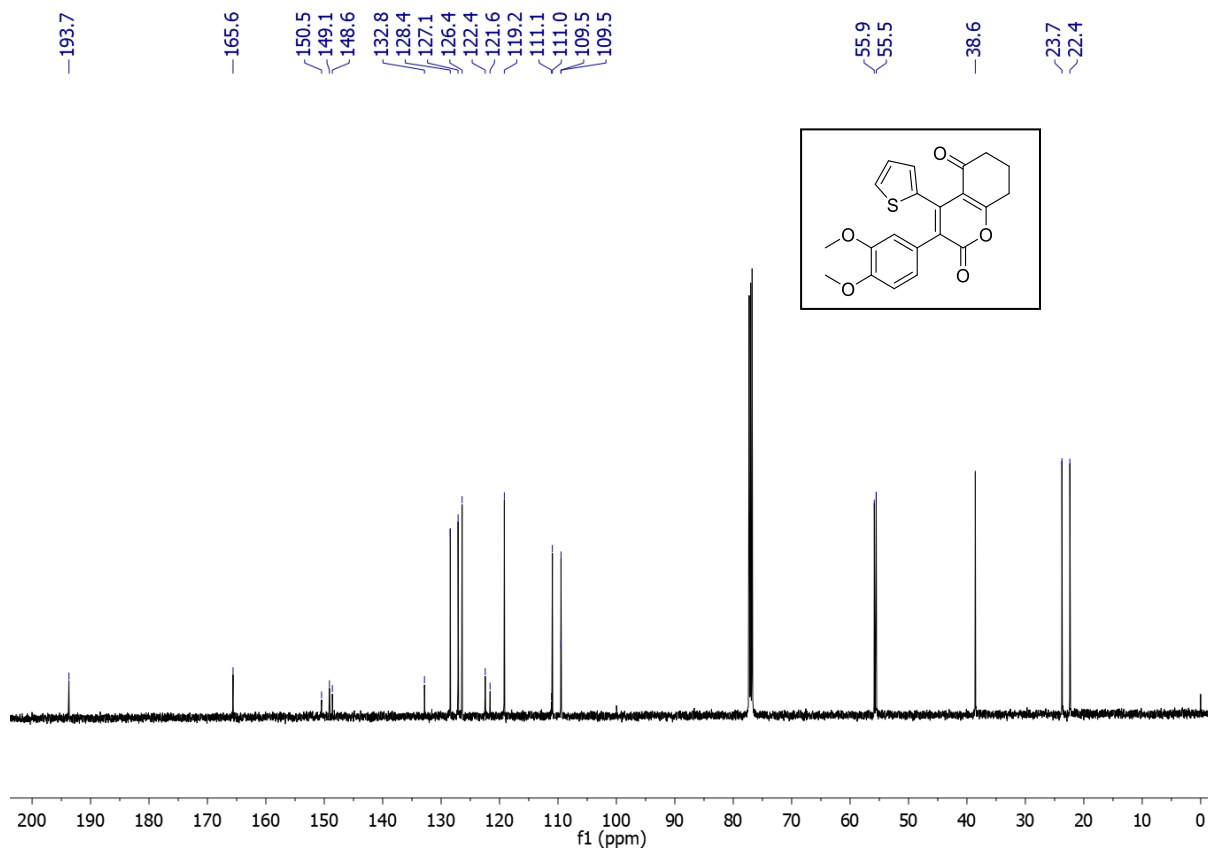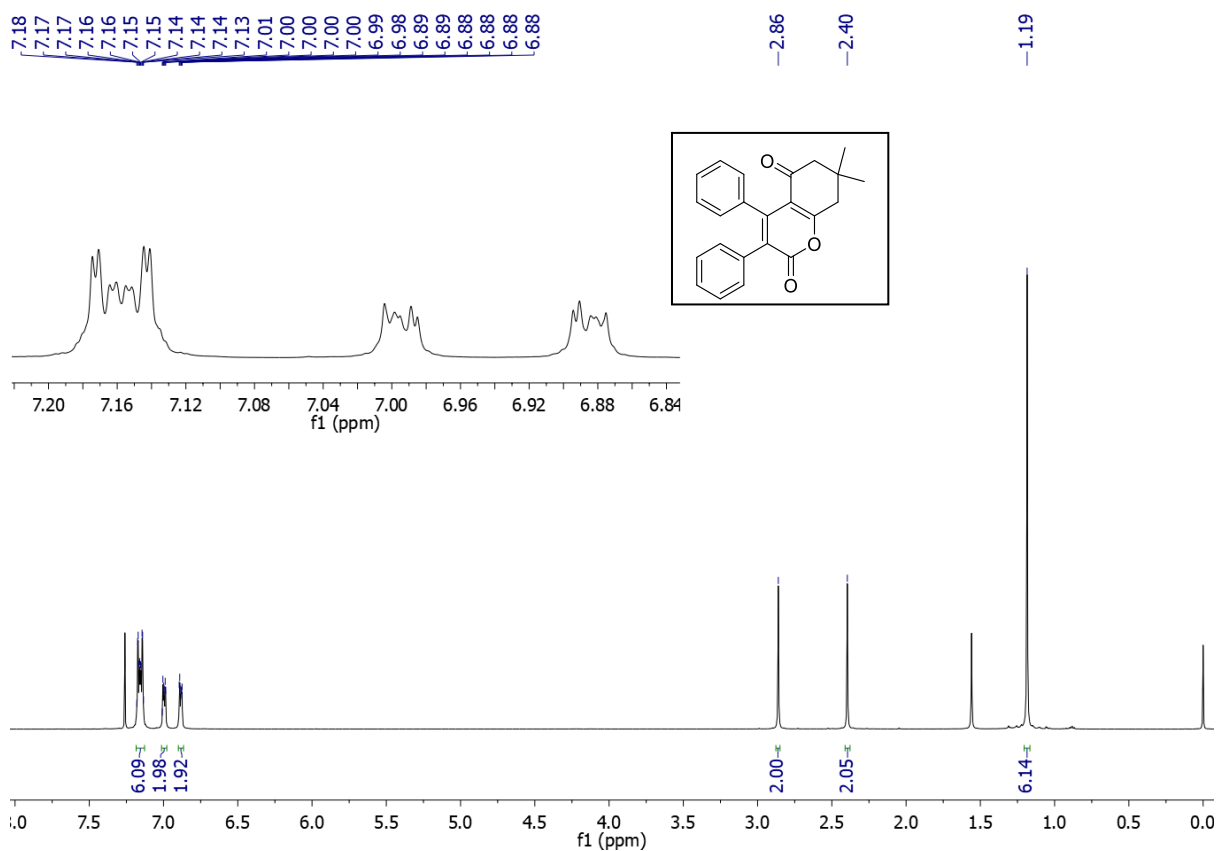



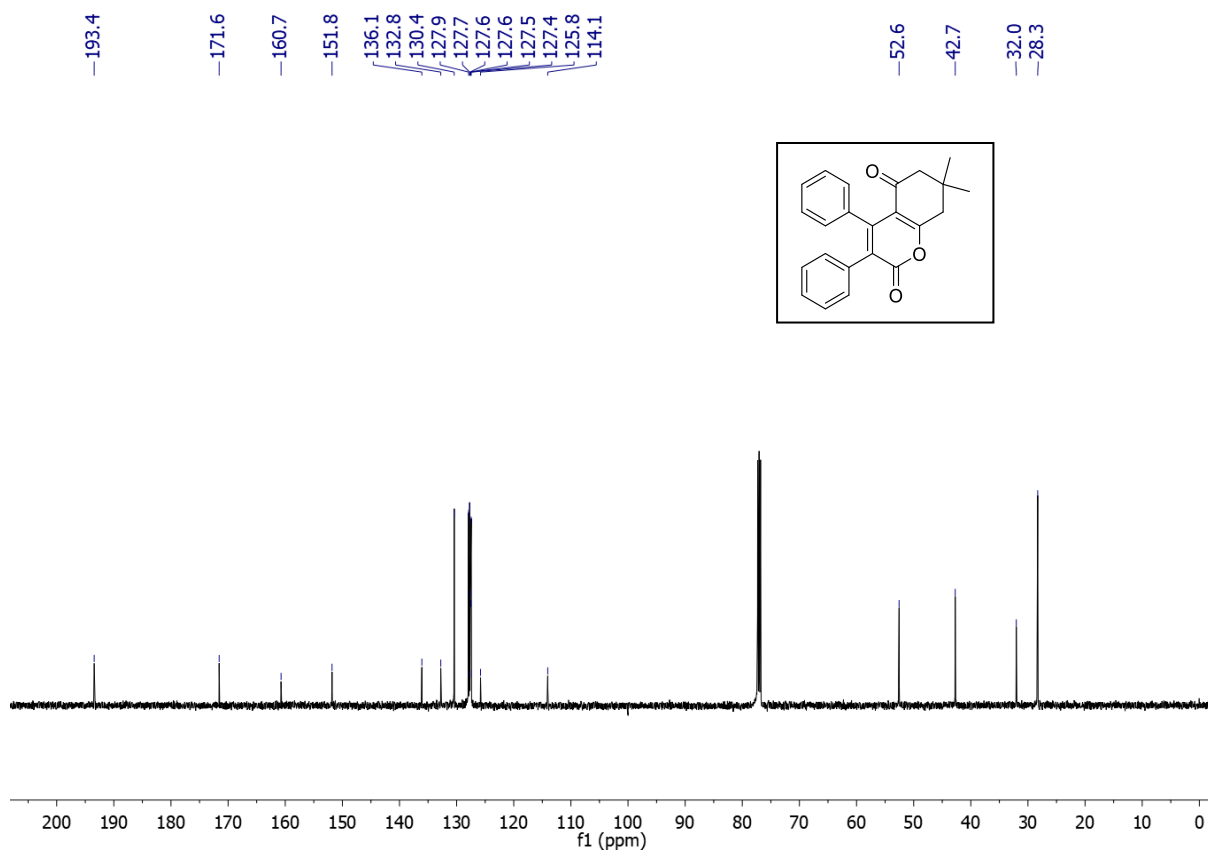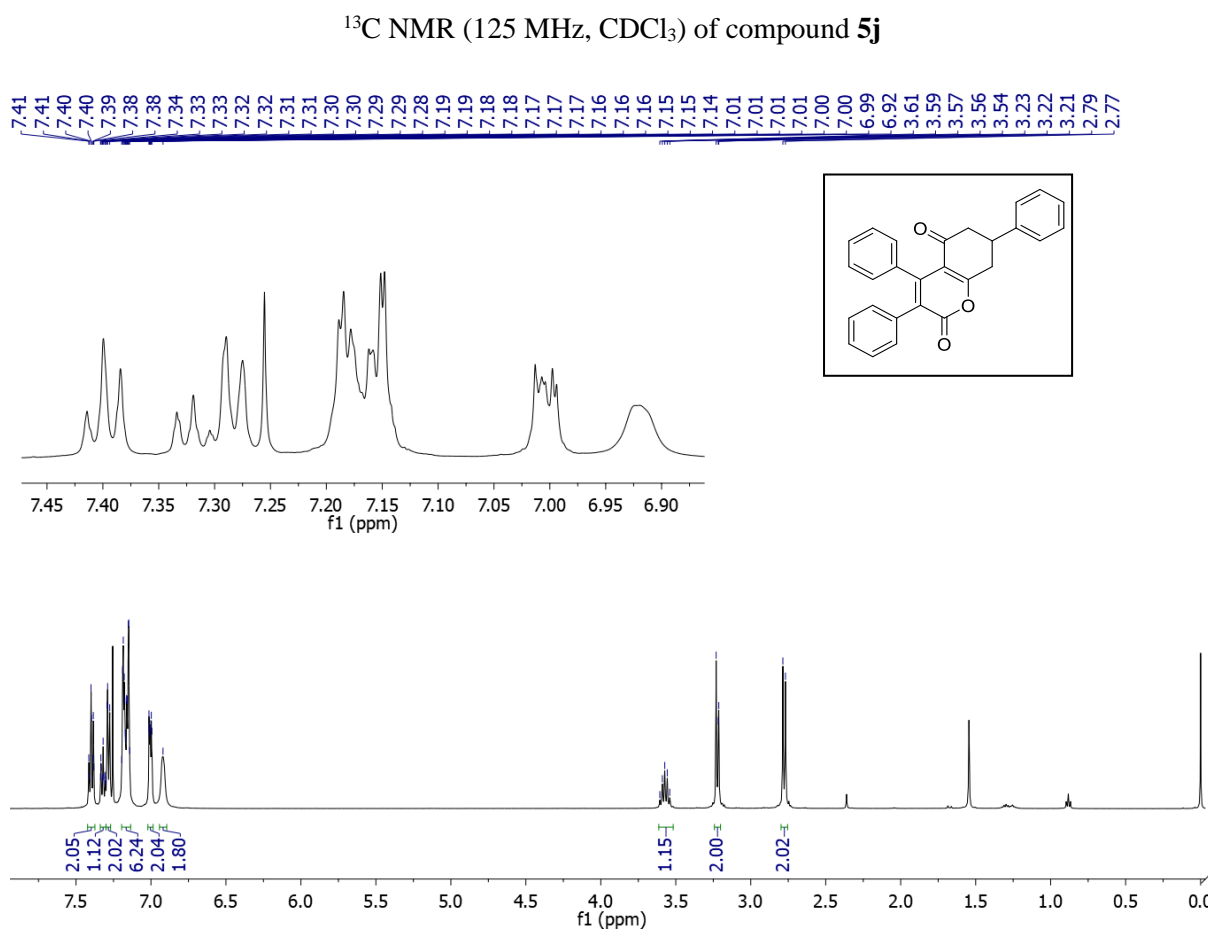

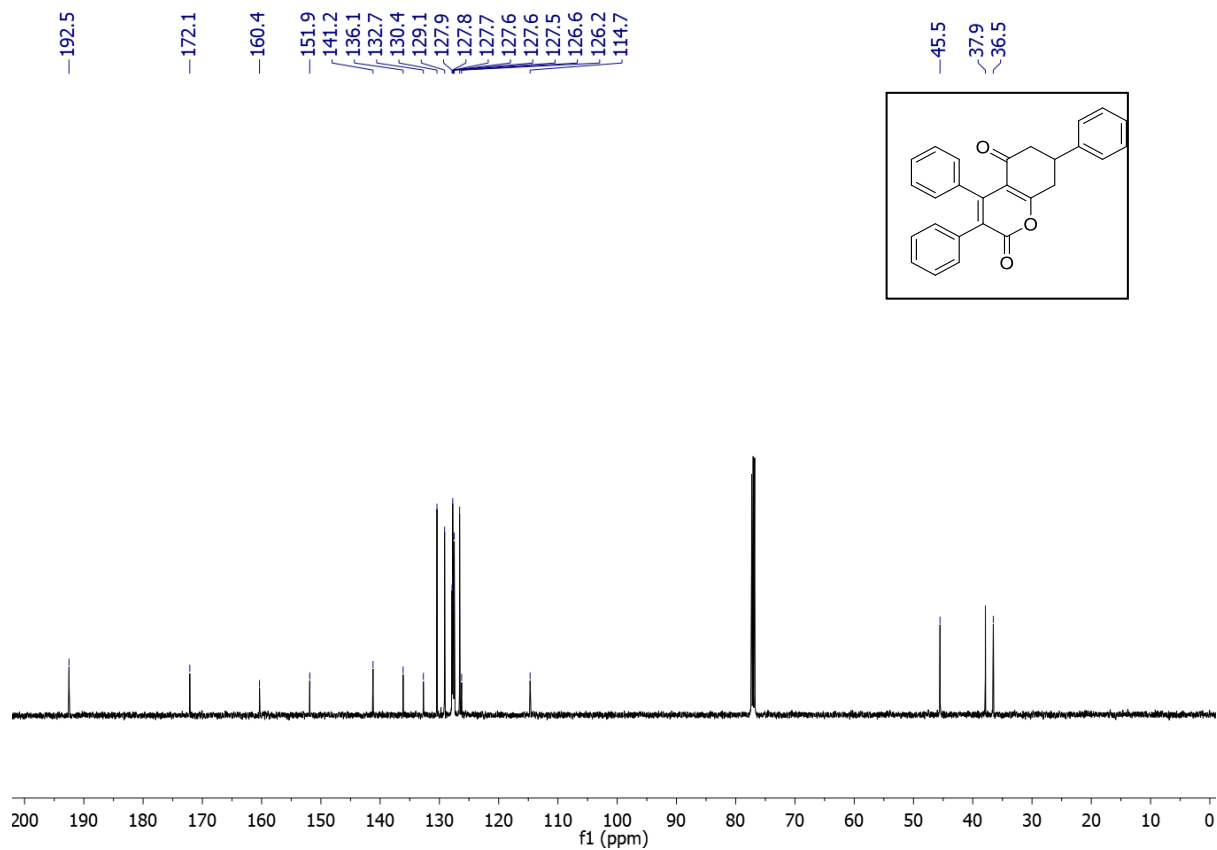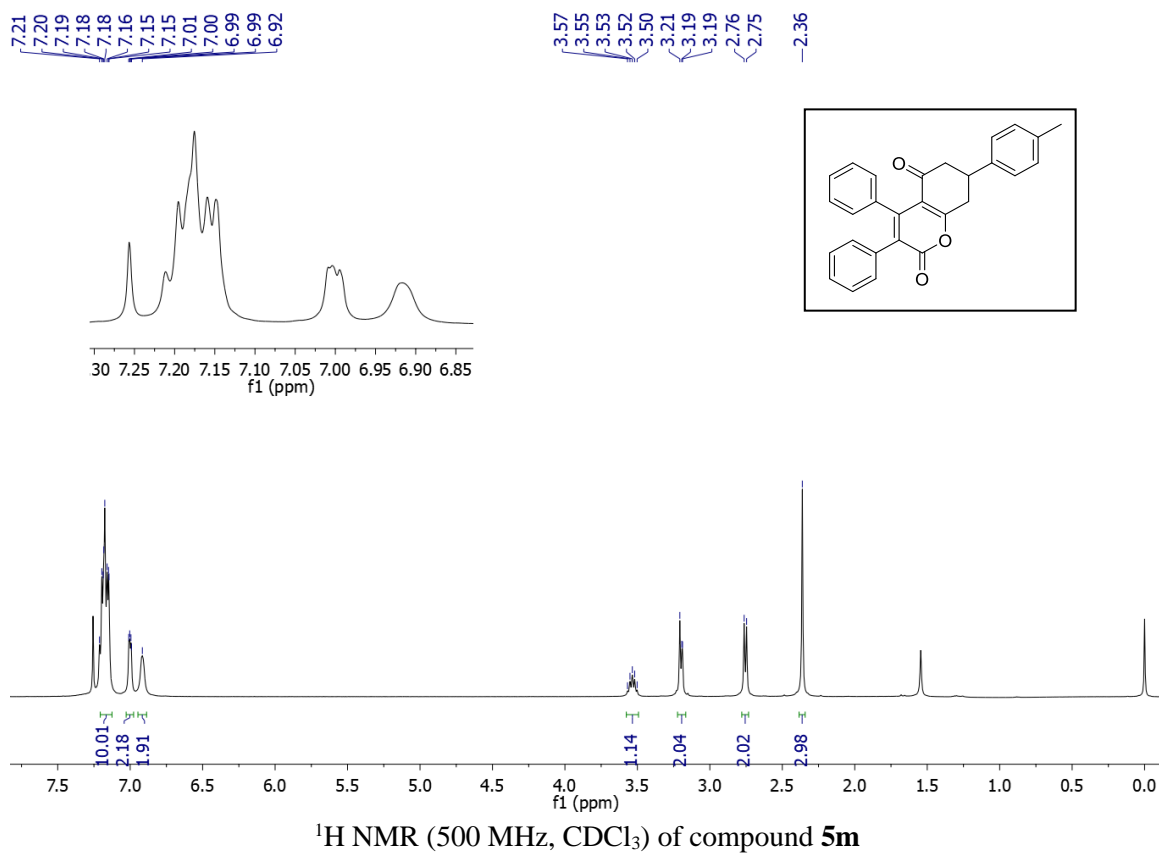

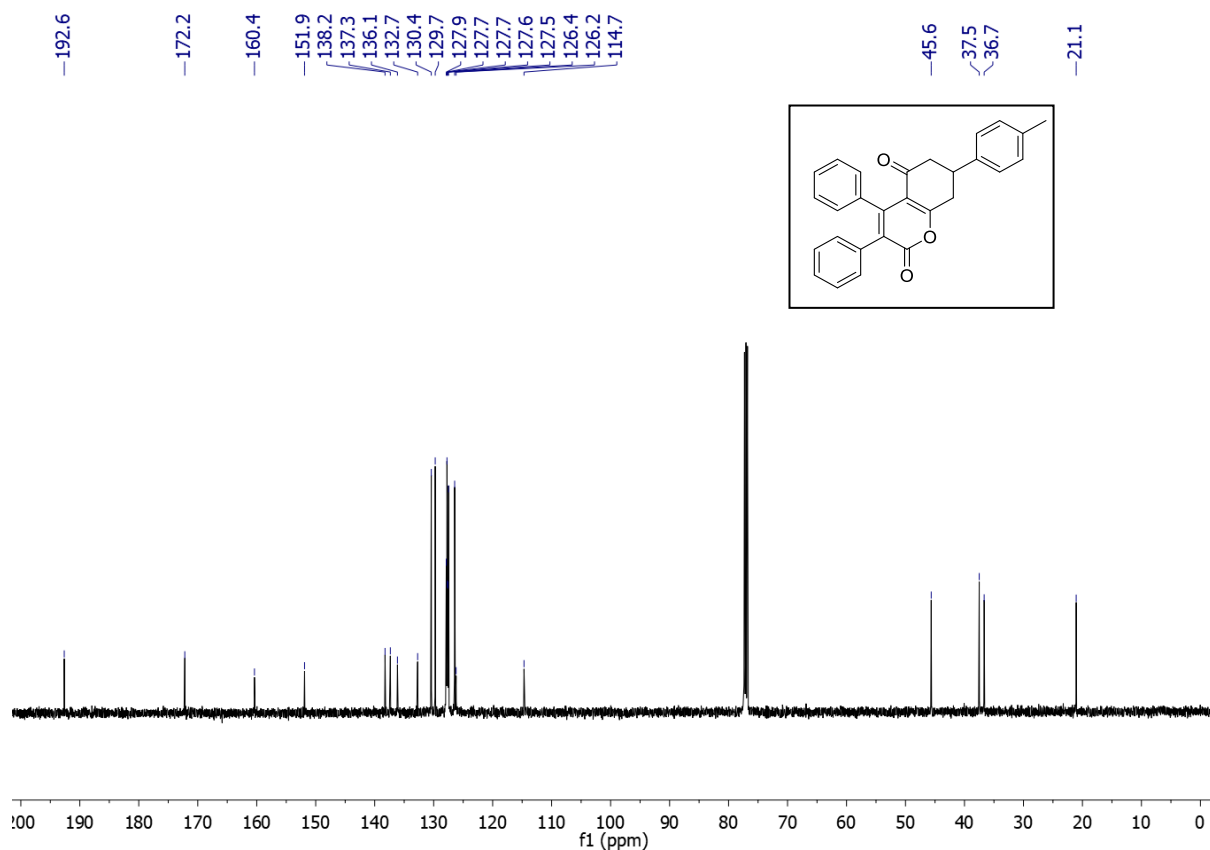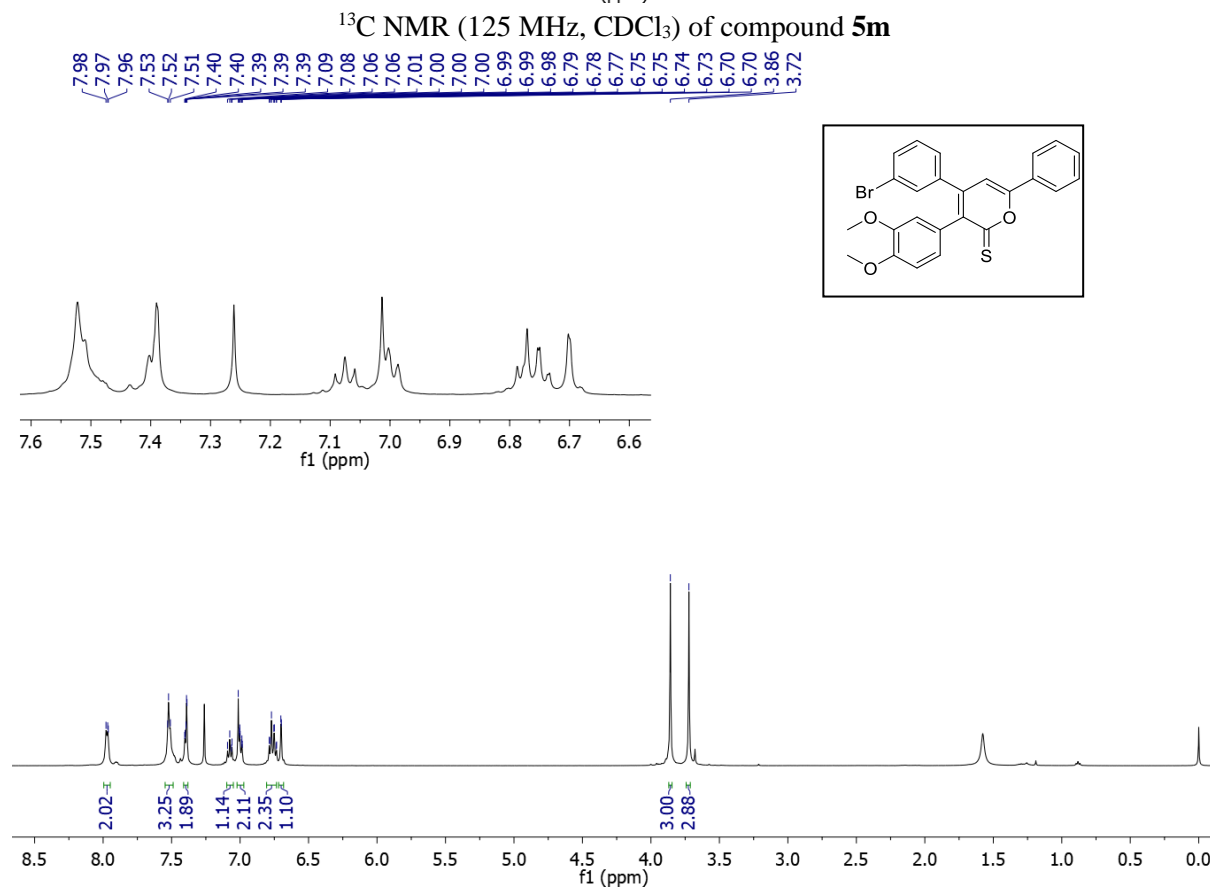

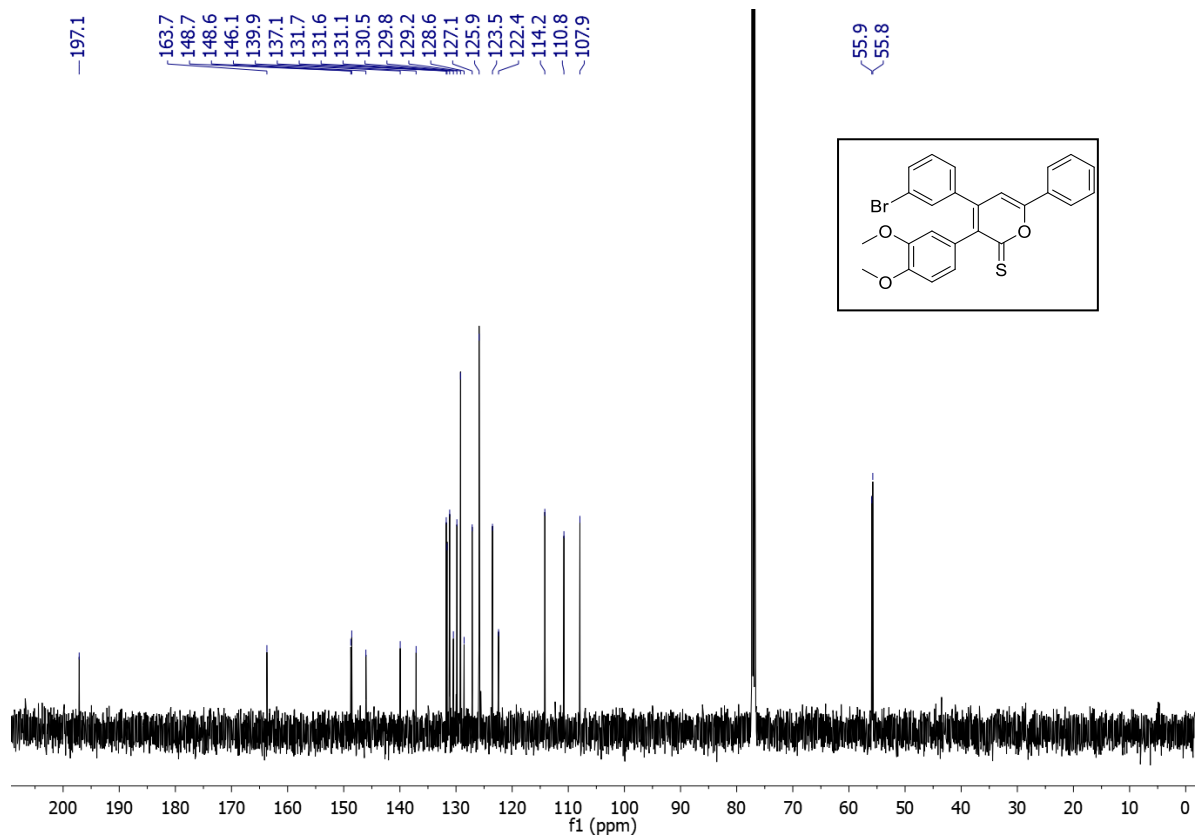

Supplement: d2nj03454a1.pdf [file d2nj03454a1.pdf]
